# Supplementary material for: Synthesis of 5,6-Dihydrophenanthridines via Palladium-Catalyzed Intramolecular Dehydrogenative Coupling of Two Aryl C−H Bonds
Source: MDPI journal article supplement (doi:10.3390/molecules28062498), 2023-03-09
Supplement: s1 [file s1]

*Supporting Information*

**Synthesis of 5,6-Dihydrophenanthridines via Palladium Catalyzed  
Intramolecular Dehydrogenative Coupling of Two Aryl C–H Bonds**

**Meng-Yue Wang <sup>†</sup>, Xue-Qing Zhu <sup>†</sup>, Bao-Yin Zhao, Hong-Xia Zhang, Yong-Qiang Wang <sup>\*</sup>  
and Qiong Jia <sup>\*</sup>**

Key Laboratory of Synthetic and Natural Functional Molecule Chemistry of  
Ministry of Education, School of Foreign Languages, College of Chemistry &  
Materials Science, Northwest University, Xi'an 710069, China

<sup>\*</sup> Correspondence: wangyq@nwu.edu.cn (Y.-Q.W.); jiaqiong@nwu.edu.cn (Q.J.)

<sup>†</sup> These authors contributed equally to this work.

**Table of Contents**

|                                                                                       |            |
|---------------------------------------------------------------------------------------|------------|
| <b>1. General information.....</b>                                                    | <b>S1</b>  |
| <b>2. Condition optimization for preparation of product 2.....</b>                    | <b>S2</b>  |
| <b>3. Experimental procedure for the KIE study.....</b>                               | <b>S4</b>  |
| <b>4. Spectral copies of substrates <sup>1</sup>H NMR and <sup>13</sup>C NMR.....</b> | <b>S5</b>  |
| <b>5. Spectral copies of products <sup>1</sup>H NMR and <sup>13</sup>C NMR.....</b>   | <b>S25</b> |
| <b>6. Spectral copies of 3-7 <sup>1</sup>H NMR and <sup>13</sup>C NMR.....</b>        | <b>S45</b> |
| <b>7. X-ray Crystal Structure of Compounds 2a.....</b>                                | <b>S50</b> |

## 1. General information

All reactions were carried out under an air atmosphere. Unless noted otherwise, commercially available chemicals were used without further purification. Flash chromatography was performed with silica gel (200-300 mesh). Oil bath served as the heat source. NMR spectra were acquired on Bruker 400 MHz ( $^1\text{H}$  at 400 MHz,  $^{13}\text{C}$  at 101 MHz) or Jeol 400 MHz ( $^1\text{H}$  at 400 MHz,  $^{13}\text{C}$  at 100 MHz). NMR spectra were recorded in  $\text{CDCl}_3$  (TMS,  $\delta = 0.00$  ppm for  $^1\text{H}$  NMR and  $\delta = 77.10$  ppm for  $^{13}\text{C}$  NMR) or  $\text{DMSO-d}_6$  ( $\delta = 2.50$  ppm for  $^1\text{H}$  NMR and  $\delta = 39.52$  ppm for  $^{13}\text{C}$  NMR) or  $\text{CD}_3\text{OD}$  ( $\delta = 3.31$  ppm for  $^1\text{H}$  NMR and  $\delta = 49.00$  ppm for  $^{13}\text{C}$  NMR) using the solvent residue peaks as the internal references. Coupling constants were reported in Hertz (Hz). Data for  $^1\text{H}$  NMR spectra were reported as follows: chemical shift (ppm, referenced to protium, s = singlet, d = doublet, t = triplet, q = quartet, dd = doublet of doublets, td = triplet of doublets, ddd = doublet of doublet of doublets, m = multiplet, coupling constant (Hz), and integration). Infrared (IR) data were acquired on a Bruker Invenio-RFT-IR spectrometer. Absorbance frequencies are reported in reciprocal centimeters ( $\text{cm}^{-1}$ ). Mass spectra were acquired on a BrukerDaltonics S2 MicroTof-Q II mass spectrometer. X-ray crystal structure analyses were measured on Bruker Smart APEXIICCD instrument using  $\text{Mo-K}\alpha$  radiation. The structures were solved and refined using the SHELXTL software package.

## 2. Condition optimization for preparation of product 2

**Table S1.** Optimization of conditions for the synthesis of 5,6-dihydrophenanthridine

Reaction scheme: **1**  $\xrightarrow[\text{solvent, } T/^{\circ}\text{C}]{[\text{Pd}], \text{additive}}$  **2**

|    | R <sup>1</sup>          | R <sup>2</sup> | Pd cat.<br>(equiv)         | Additive<br>(equiv)                          | T<br>/°C | Solvent                                             | Yield<br>(%) <sup>a</sup> |
|----|-------------------------|----------------|----------------------------|----------------------------------------------|----------|-----------------------------------------------------|---------------------------|
| 1  | -H                      | Ac             | Pd(OAc) <sub>2</sub> (0.1) | /                                            | 70       | DMSO                                                | 0                         |
| 2  | -CONMe <sub>2</sub>     | Ac             | Pd(OAc) <sub>2</sub> (0.1) | /                                            | 70       | DMSO                                                | trace                     |
| 3  | -CO(2-Py)               | Ac             | Pd(OAc) <sub>2</sub> (0.1) | /                                            | 70       | DMSO                                                | trace                     |
| 4  | -SO <sub>2</sub> (2-Py) | Ac             | Pd(OAc) <sub>2</sub> (0.1) | /                                            | 70       | DMSO                                                | 9                         |
| 5  | -SO <sub>2</sub> (2-Py) | Ac             | Pd(OAc) <sub>2</sub> (0.1) | /                                            | 70       | DCE                                                 | 5                         |
| 6  | -SO <sub>2</sub> (2-Py) | Ac             | Pd(OAc) <sub>2</sub> (0.1) | /                                            | 70       | HFIP                                                | 11                        |
| 7  | -SO <sub>2</sub> (2-Py) | Ac             | Pd(OAc) <sub>2</sub> (0.1) | /                                            | 70       | CF <sub>3</sub> CH <sub>2</sub> OH                  | 12                        |
| 8  | -SO <sub>2</sub> (2-Py) | Ac             | Pd(OAc) <sub>2</sub> (0.1) | /                                            | 70       | CF <sub>2</sub> HCF <sub>2</sub> CH <sub>2</sub> OH | 4                         |
| 9  | -SO <sub>2</sub> (2-Py) | Ac             | Pd(OAc) <sub>2</sub> (0.1) | /                                            | 70       | CF <sub>2</sub> HCH <sub>2</sub> OH                 | 5                         |
| 10 | -SO <sub>2</sub> (2-Py) | Ac             | Pd(OAc) <sub>2</sub> (0.1) | /                                            | 70       | EA                                                  | 2                         |
| 11 | -SO <sub>2</sub> (2-Py) | Ac             | Pd(OAc) <sub>2</sub> (0.1) | /                                            | 70       | PhMe                                                | 3                         |
| 12 | -SO <sub>2</sub> (2-Py) | Ac             | Pd(OAc) <sub>2</sub> (0.1) | /                                            | 70       | Other solvents                                      | N.R.                      |
| 13 | -SO <sub>2</sub> (2-Py) | Ac             | Pd(OAc) <sub>2</sub> (0.1) | Cu(TFA) <sub>2</sub> ·H <sub>2</sub> O (1.1) | 70       | CF <sub>3</sub> CH <sub>2</sub> OH                  | 31                        |
| 14 | -SO <sub>2</sub> (2-Py) | Ac             | Pd(OAc) <sub>2</sub> (0.1) | Cu(OAc) <sub>2</sub> ·H <sub>2</sub> O (1.1) | 70       | CF <sub>3</sub> CH <sub>2</sub> OH                  | 22                        |
| 15 | -SO <sub>2</sub> (2-Py) | Ac             | Pd(OAc) <sub>2</sub> (0.1) | Cu(OAc) <sub>2</sub> (1.1)                   | 70       | CF <sub>3</sub> CH <sub>2</sub> OH                  | 21                        |
| 16 | -SO <sub>2</sub> (2-Py) | Ac             | Pd(OAc) <sub>2</sub> (0.1) | CuOAc (1.1)                                  | 70       | CF <sub>3</sub> CH <sub>2</sub> OH                  | 11                        |
| 17 | -SO <sub>2</sub> (2-Py) | Ac             | Pd(OAc) <sub>2</sub> (0.1) | CuI (1.1)                                    | 70       | CF <sub>3</sub> CH <sub>2</sub> OH                  | 10                        |
| 18 | -SO <sub>2</sub> (2-Py) | Ac             | Pd(OAc) <sub>2</sub> (0.1) | CuO (1.1)                                    | 70       | CF <sub>3</sub> CH <sub>2</sub> OH                  | 12                        |
| 19 | -SO <sub>2</sub> (2-Py) | Ac             | Pd(OAc) <sub>2</sub> (0.1) | CuSO <sub>4</sub> (1.1)                      | 70       | CF <sub>3</sub> CH <sub>2</sub> OH                  | 18                        |
| 20 | -SO <sub>2</sub> (2-Py) | Ac             | Pd(OAc) <sub>2</sub> (0.1) | CuF <sub>2</sub> ·2H <sub>2</sub> O (1.1)    | 70       | CF <sub>3</sub> CH <sub>2</sub> OH                  | 29                        |
| 21 | -SO <sub>2</sub> (2-Py) | Ac             | Pd(OAc) <sub>2</sub> (0.1) | AgTFA (1.1)                                  | 70       | CF <sub>3</sub> CH <sub>2</sub> OH                  | 9                         |
| 22 | -SO <sub>2</sub> (2-Py) | Ac             | Pd(OAc) <sub>2</sub> (0.1) | AgNO <sub>3</sub> (1.1)                      | 70       | CF <sub>3</sub> CH <sub>2</sub> OH                  | 8                         |

|                 |                         |     |                                                             |                                              |     |                                    |       |
|-----------------|-------------------------|-----|-------------------------------------------------------------|----------------------------------------------|-----|------------------------------------|-------|
| 23              | -SO <sub>2</sub> (2-Py) | Ac  | Pd(OAc) <sub>2</sub> (0.1)                                  | Other additives                              | 70  | CF <sub>3</sub> CH <sub>2</sub> OH | N.R.  |
| 24 <sup>b</sup> | -SO <sub>2</sub> (2-Py) | Ac  | Pd(OAc) <sub>2</sub> (0.1)                                  | -                                            | 70  | CF <sub>3</sub> CH <sub>2</sub> OH | 8     |
| 25              | -SO <sub>2</sub> (2-Py) | Ac  | Pd(OAc) <sub>2</sub> (0.1)                                  | Cu(TFA) <sub>2</sub> ·H <sub>2</sub> O (1.1) | 40  | CF <sub>3</sub> CH <sub>2</sub> OH | N.R.  |
| 26              | -SO <sub>2</sub> (2-Py) | Ac  | Pd(OAc) <sub>2</sub> (0.1)                                  | Cu(TFA) <sub>2</sub> ·H <sub>2</sub> O (1.1) | 60  | CF <sub>3</sub> CH <sub>2</sub> OH | 23    |
| 27              | -SO <sub>2</sub> (2-Py) | Ac  | Pd(OAc) <sub>2</sub> (0.1)                                  | Cu(TFA) <sub>2</sub> ·H <sub>2</sub> O (1.1) | 80  | CF <sub>3</sub> CH <sub>2</sub> OH | 35    |
| 28              | -SO <sub>2</sub> (2-Py) | Ac  | Pd(OAc) <sub>2</sub> (0.1)                                  | Cu(TFA) <sub>2</sub> ·H <sub>2</sub> O (1.1) | 100 | CF <sub>3</sub> CH <sub>2</sub> OH | 45    |
| 29              | -SO <sub>2</sub> (2-Py) | Ac  | Pd(OAc) <sub>2</sub> (0.1)                                  | Cu(TFA) <sub>2</sub> ·H <sub>2</sub> O (1.1) | 120 | CF <sub>3</sub> CH <sub>2</sub> OH | 46    |
| 30              | -SO <sub>2</sub> (2-Py) | Ts  | Pd(OAc) <sub>2</sub> (0.1)                                  | Cu(TFA) <sub>2</sub> ·H <sub>2</sub> O (1.1) | 100 | CF <sub>3</sub> CH <sub>2</sub> OH | trace |
| 31              | -SO <sub>2</sub> (2-Py) | Boc | Pd(OAc) <sub>2</sub> (0.1)                                  | Cu(TFA) <sub>2</sub> ·H <sub>2</sub> O (1.1) | 100 | CF <sub>3</sub> CH <sub>2</sub> OH | trace |
| 32              | -SO <sub>2</sub> (2-Py) | Me  | Pd(OAc) <sub>2</sub> (0.1)                                  | Cu(TFA) <sub>2</sub> ·H <sub>2</sub> O (1.1) | 100 | CF <sub>3</sub> CH <sub>2</sub> OH | 3     |
| 33              | -SO <sub>2</sub> (2-Py) | Ph  | Pd(OAc) <sub>2</sub> (0.1)                                  | Cu(TFA) <sub>2</sub> ·H <sub>2</sub> O (1.1) | 100 | CF <sub>3</sub> CH <sub>2</sub> OH | 18    |
| 34              | -SO <sub>2</sub> (2-Py) | Ac  | Pd(PPh <sub>3</sub> ) <sub>4</sub> (0.1)                    | Cu(TFA) <sub>2</sub> ·H <sub>2</sub> O (1.1) | 100 | CF <sub>3</sub> CH <sub>2</sub> OH | 53    |
| 35              | -SO <sub>2</sub> (2-Py) | Ac  | Pd(TFA) <sub>2</sub> (0.1)                                  | Cu(TFA) <sub>2</sub> ·H <sub>2</sub> O (1.1) | 100 | CF <sub>3</sub> CH <sub>2</sub> OH | 62    |
| 36              | -SO <sub>2</sub> (2-Py) | Ac  | Pd <sub>2</sub> (dba) <sub>3</sub> (0.1)                    | Cu(TFA) <sub>2</sub> ·H <sub>2</sub> O (1.1) | 100 | CF <sub>3</sub> CH <sub>2</sub> OH | trace |
| 37              | -SO <sub>2</sub> (2-Py) | Ac  | Pd(OH) <sub>2</sub> (0.1)                                   | Cu(TFA) <sub>2</sub> ·H <sub>2</sub> O (1.1) | 100 | CF <sub>3</sub> CH <sub>2</sub> OH | N.R.  |
| 38              | -SO <sub>2</sub> (2-Py) | Ac  | PdI <sub>2</sub> (0.1)                                      | Cu(TFA) <sub>2</sub> ·H <sub>2</sub> O (1.1) | 100 | CF <sub>3</sub> CH <sub>2</sub> OH | N.R.  |
| 39              | -SO <sub>2</sub> (2-Py) | Ac  | Pd(PPh <sub>3</sub> ) <sub>2</sub> Cl <sub>2</sub><br>(0.1) | Cu(TFA) <sub>2</sub> ·H <sub>2</sub> O (1.1) | 100 | CF <sub>3</sub> CH <sub>2</sub> OH | 36    |
| 40              | -SO <sub>2</sub> (2-Py) | Ac  | Pd(TFA) <sub>2</sub> (0.15)                                 | Cu(TFA) <sub>2</sub> ·H <sub>2</sub> O (1.1) | 100 | CF <sub>3</sub> CH <sub>2</sub> OH | 74    |
| 41              | -SO <sub>2</sub> (2-Py) | Ac  | Pd(TFA) <sub>2</sub> (0.3)                                  | Cu(TFA) <sub>2</sub> ·H <sub>2</sub> O (1.1) | 100 | CF <sub>3</sub> CH <sub>2</sub> OH | 75    |
| 42              | -SO <sub>2</sub> (2-Py) | Ac  | /                                                           | Cu(TFA) <sub>2</sub> ·H <sub>2</sub> O (1.1) | 100 | CF <sub>3</sub> CH <sub>2</sub> OH | /     |
| 43              | -SO <sub>2</sub> (2-Py) | Ac  | Pd(TFA) <sub>2</sub> (0.15)                                 | Cu(TFA) <sub>2</sub> ·H <sub>2</sub> O (0.5) | 100 | CF <sub>3</sub> CH <sub>2</sub> OH | 16    |
| 44              | -SO <sub>2</sub> (2-Py) | Ac  | Pd(TFA) <sub>2</sub> (0.15)                                 | Cu(TFA) <sub>2</sub> ·H <sub>2</sub> O (2.2) | 100 | CF <sub>3</sub> CH <sub>2</sub> OH | 83    |
| 45              | -SO <sub>2</sub> (2-Py) | Ac  | Pd(TFA) <sub>2</sub> (0.15)                                 | Cu(TFA) <sub>2</sub> ·H <sub>2</sub> O (4.0) | 100 | CF <sub>3</sub> CH <sub>2</sub> OH | 82    |
| 46 <sup>b</sup> | -SO <sub>2</sub> (2-Py) | Ac  | Pd(TFA) <sub>2</sub> (0.15)                                 | Cu(TFA) <sub>2</sub> ·H <sub>2</sub> O (2.2) | 100 | CF <sub>3</sub> CH <sub>2</sub> OH | 83    |

<sup>a</sup> Isolated yield. <sup>b</sup> Under argon atmosphere.

### 3. Experimental procedure for the KIE study

**3.1 Starting material:** The synthesis of [D<sub>7</sub>]-benzyl bromide was synthesized according to the literature [59]. The synthesis of [D<sub>7</sub>]-**1a** and [D<sub>6</sub>]-**2a** were the same as the synthesis of above mentioned materials **1a** and **2a**.

**KIE experiment:** We use **1a** and [D<sub>7</sub>]-**1a** as starting materials and two parallel reacting at standard conditions. The conversion was measured by <sup>1</sup>H NMR analysis for three times (1.5 h, 2.0 h, 3.0 h) to compare the initial reaction rates.

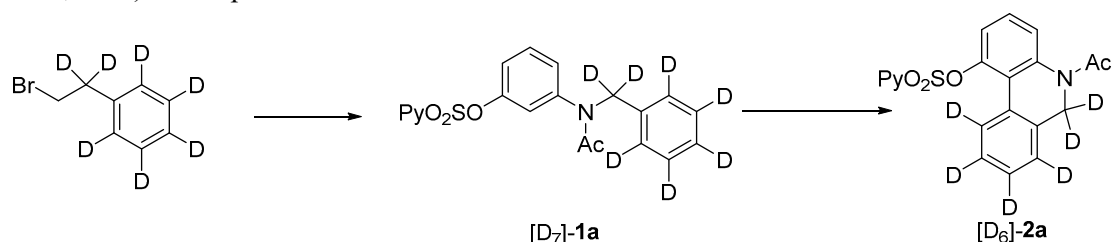

Table S2 Conversion (%) of the reaction of **1a** (7-H or 7-D).

BrC1(C)C(C)C(C)C(C)C1  $\xrightarrow[\text{K}_H / \text{K}_D = 3.04]{\text{standard condition}}$  CC(=O)N1C(C)C(C)C(C)C1  
**1a**, [D<sub>7</sub>]-**1a**  **2a**, [D<sub>6</sub>]-**2a**

| reaction time (h) | H-Conversion (%) | D-Conversion (%) |
|-------------------|------------------|------------------|
| 0                 | 0                | 0                |
| 1.5               | 3.18             | 1.47             |
| 2.0               | 3.66             | 2.91             |
| 3.0               | 9.09             | 3.67             |

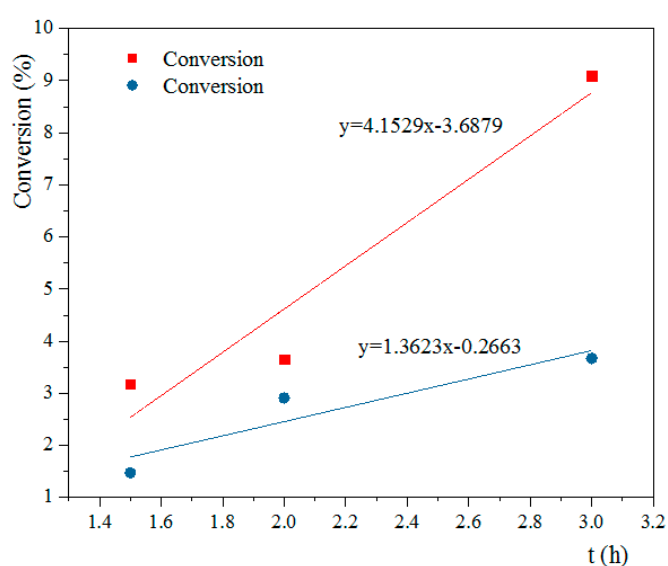

Figure S1. Conversion (%) of the reaction of **1a** (7-H or 7-D).

#### 4. Spectral copies of substrates $^1\text{H}$ NMR and $^{13}\text{C}$ NMR

$^1\text{H}$  NMR spectra of compound **1a**

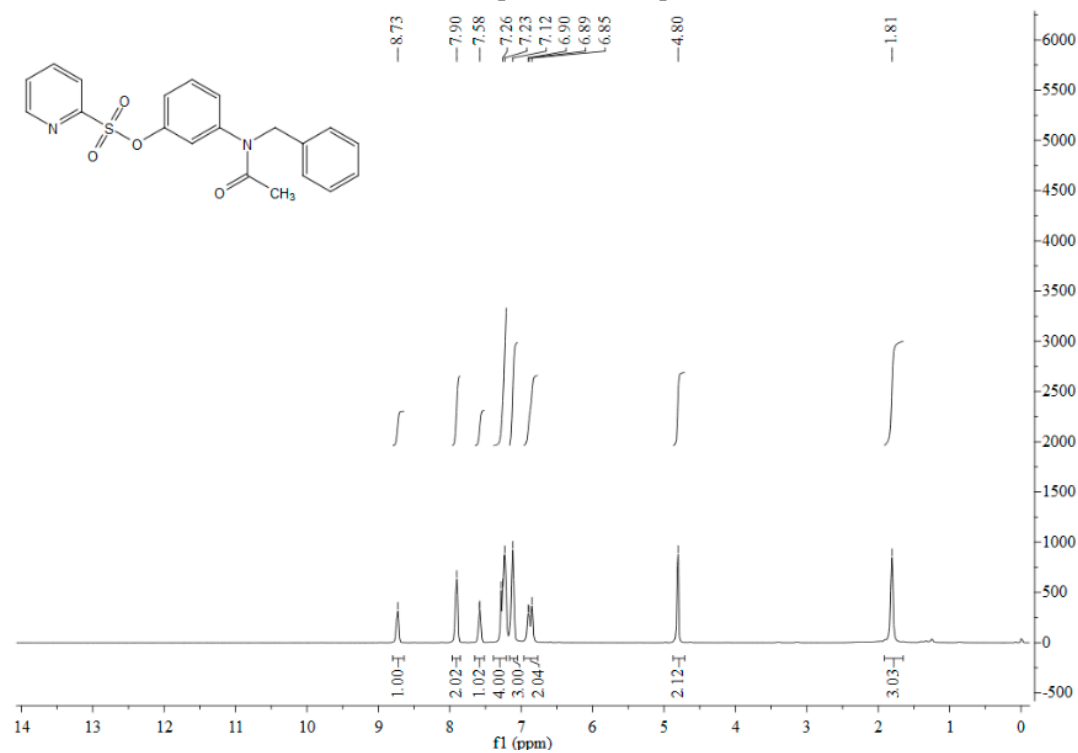

$^{13}\text{C}$  NMR spectra of compound **1a**

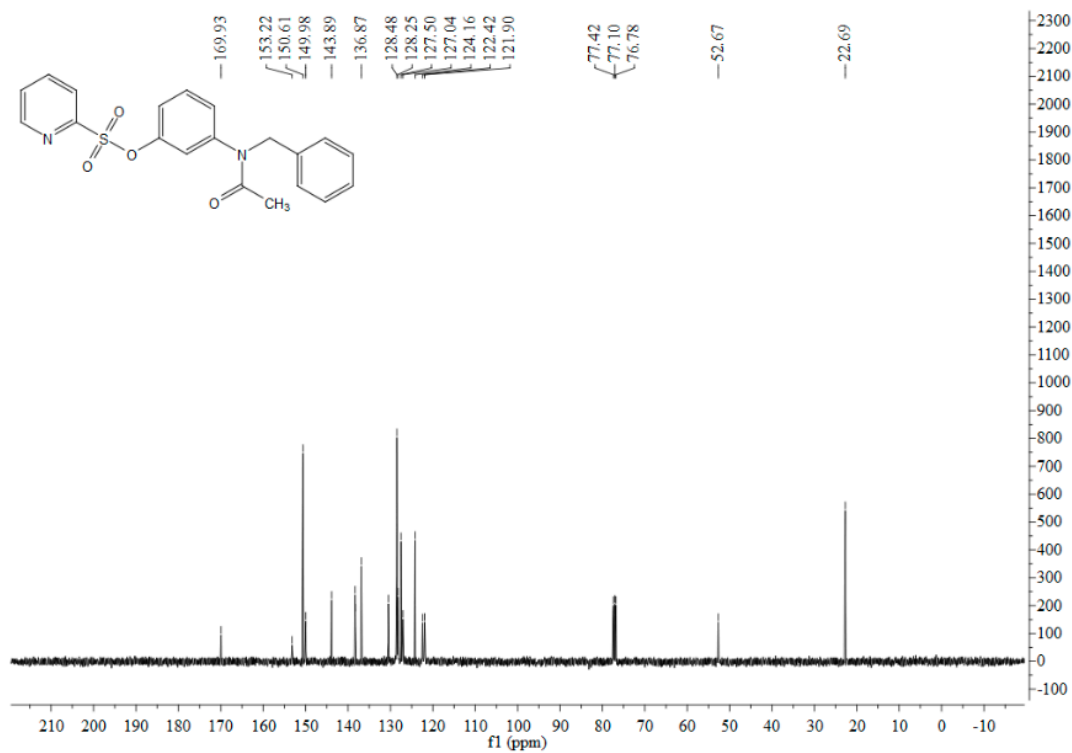

<sup>1</sup>H NMR spectra of compound **1b**

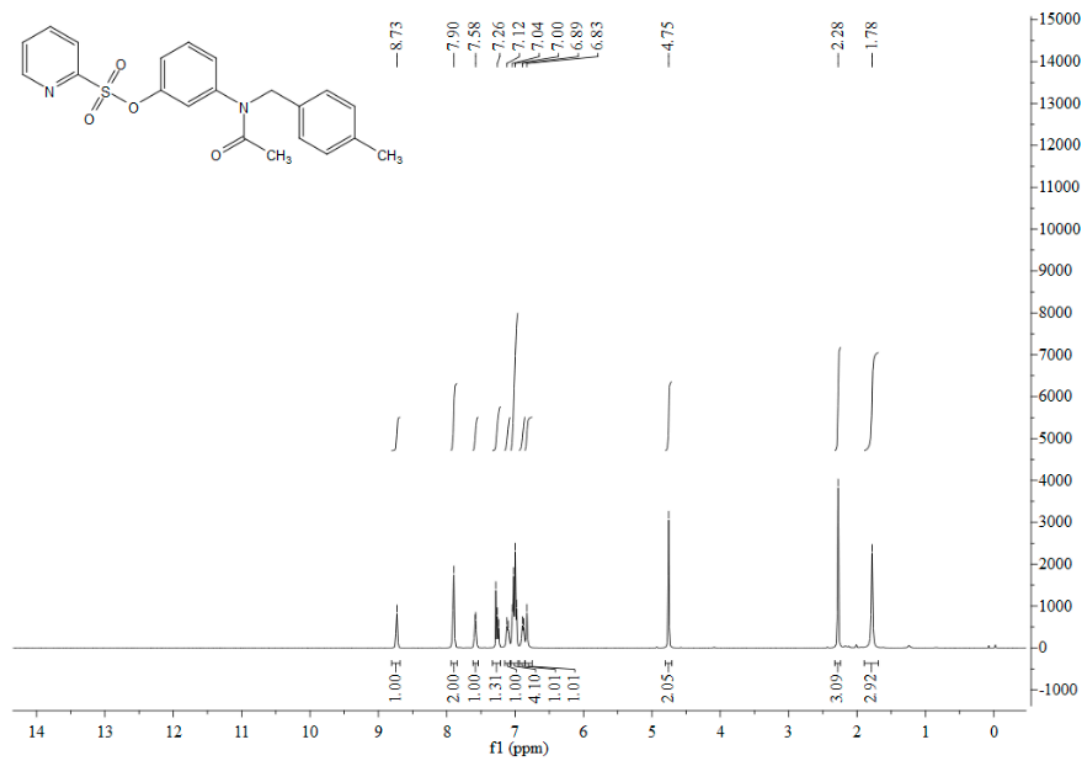

<sup>13</sup>C NMR spectra of compound **1b**

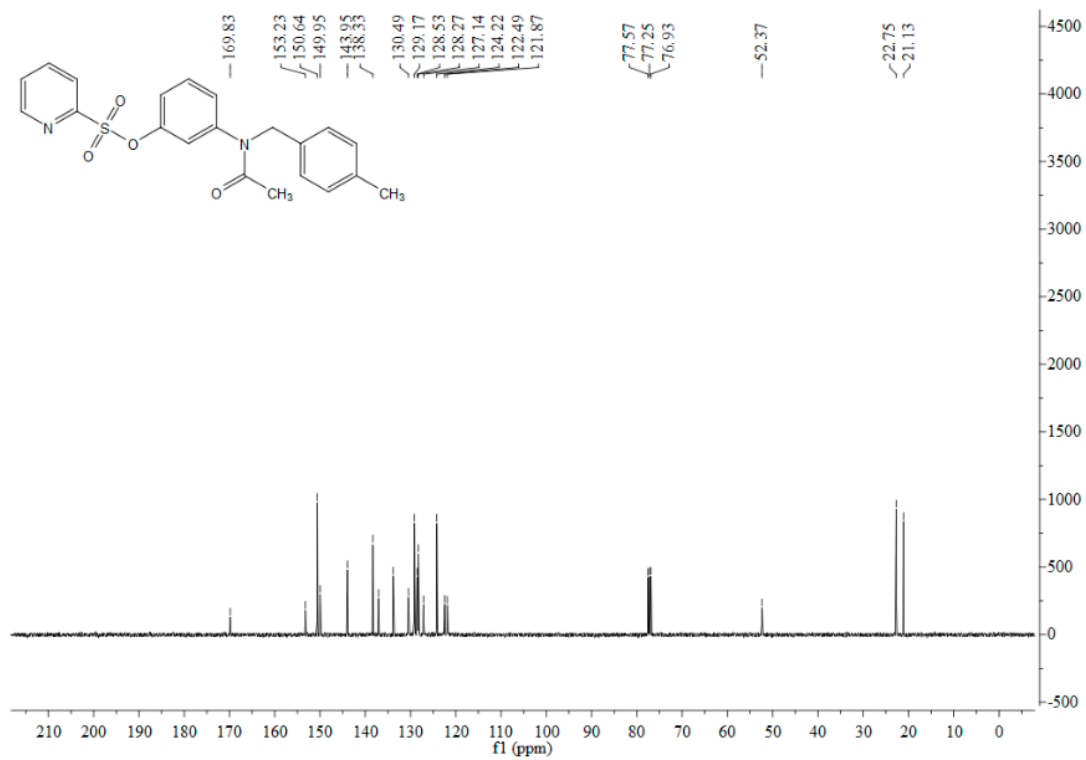

<sup>13</sup>C NMR spectra of compound 1c

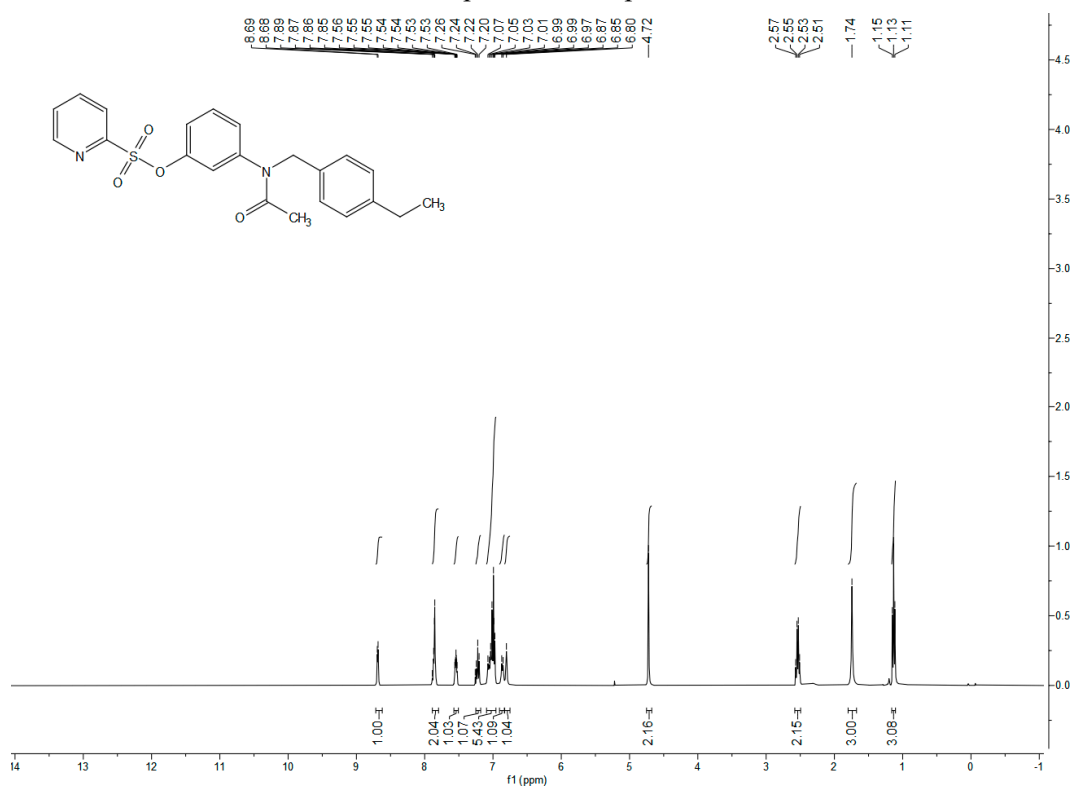

<sup>13</sup>C NMR spectra of compound 1c

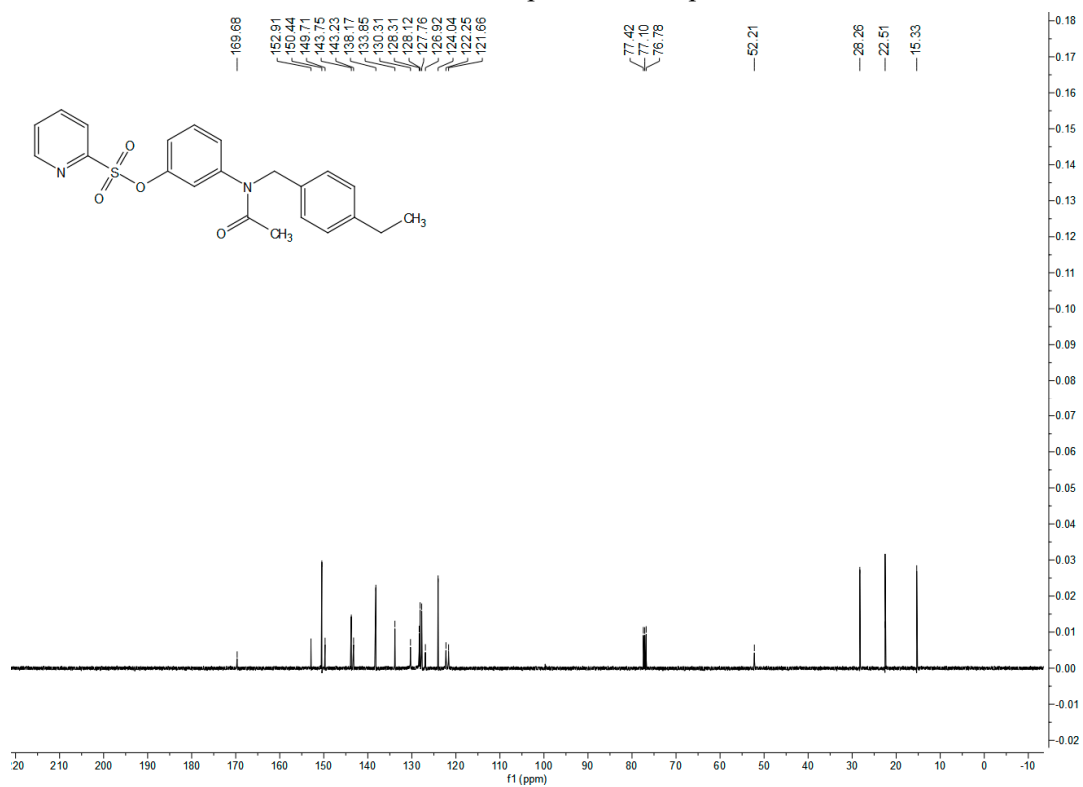



<sup>1</sup>H NMR spectra of compound **1d**

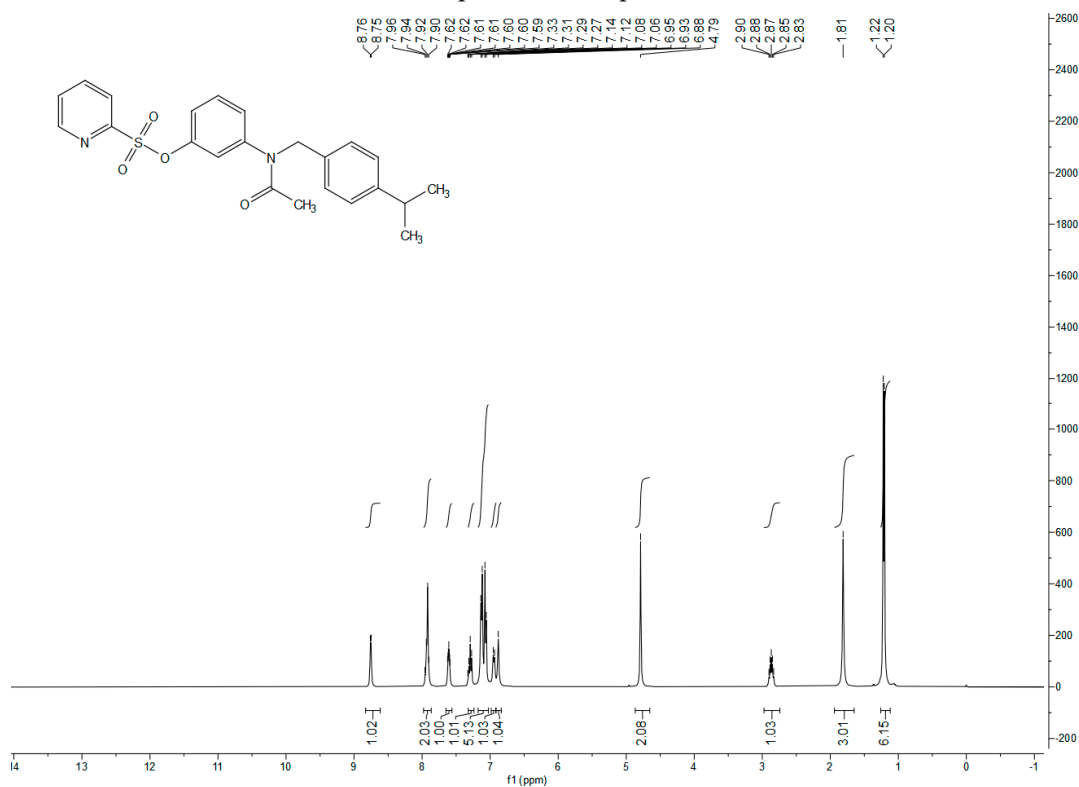 $^{13}\text{C}$  NMR spectra of compound **1d**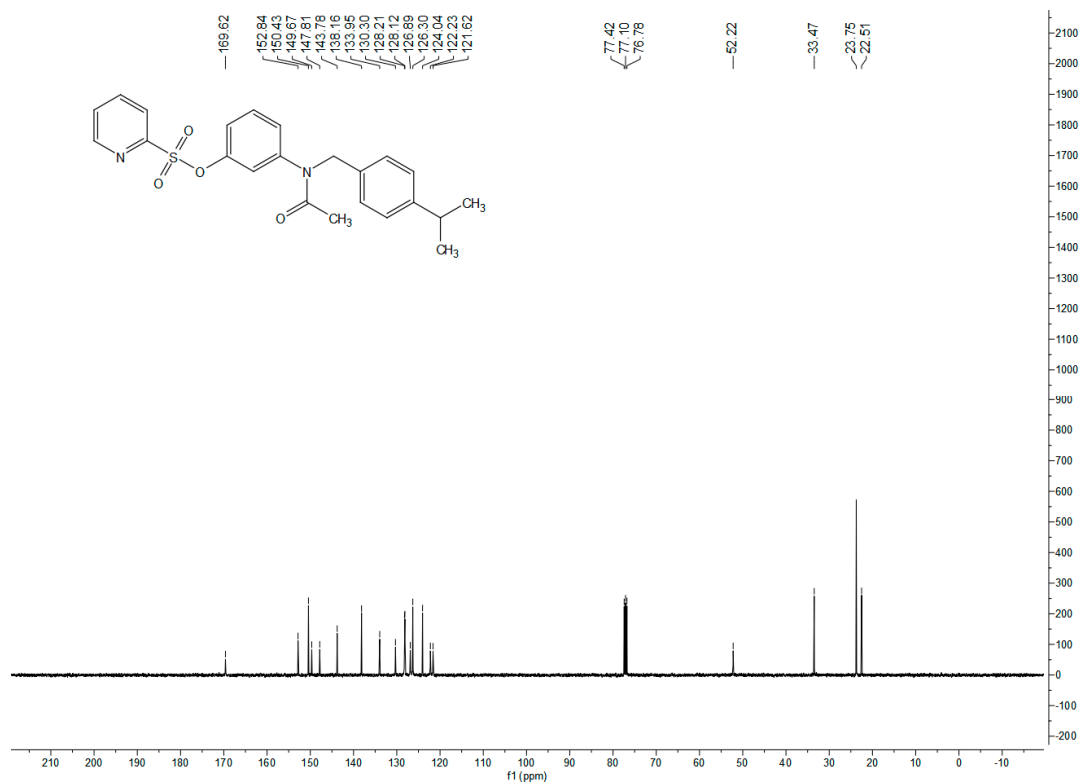

<sup>1</sup>H NMR spectra of compound **1e**

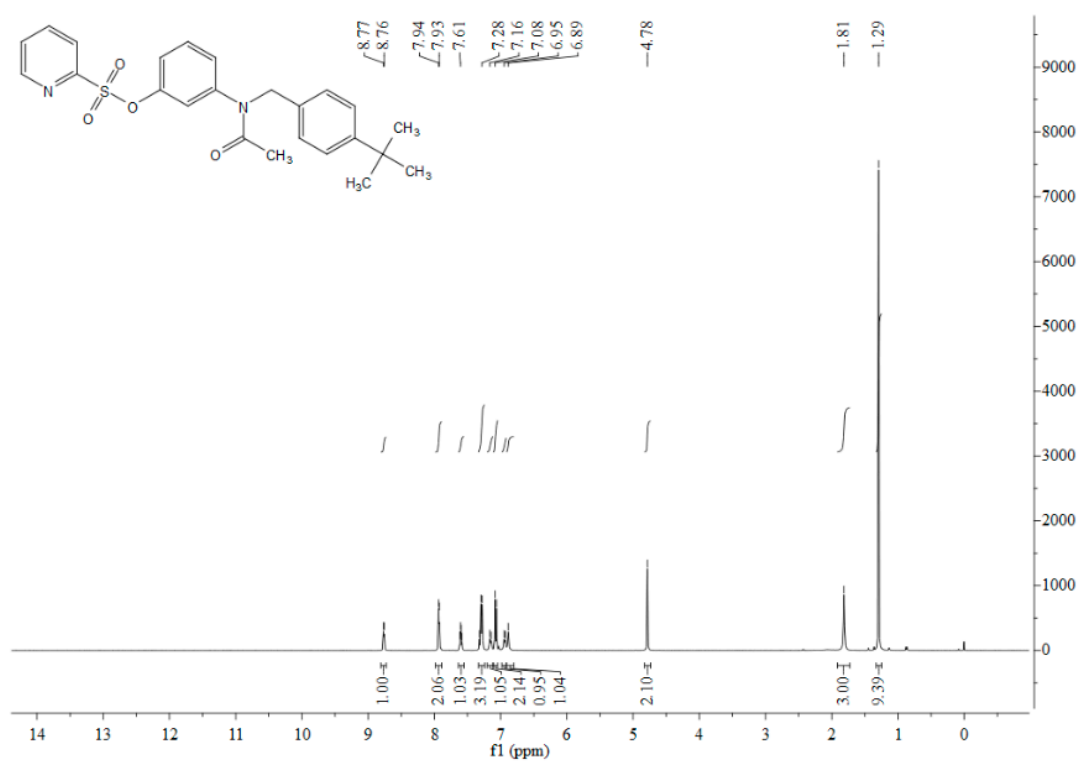

<sup>13</sup>C NMR spectra of compound **1e**

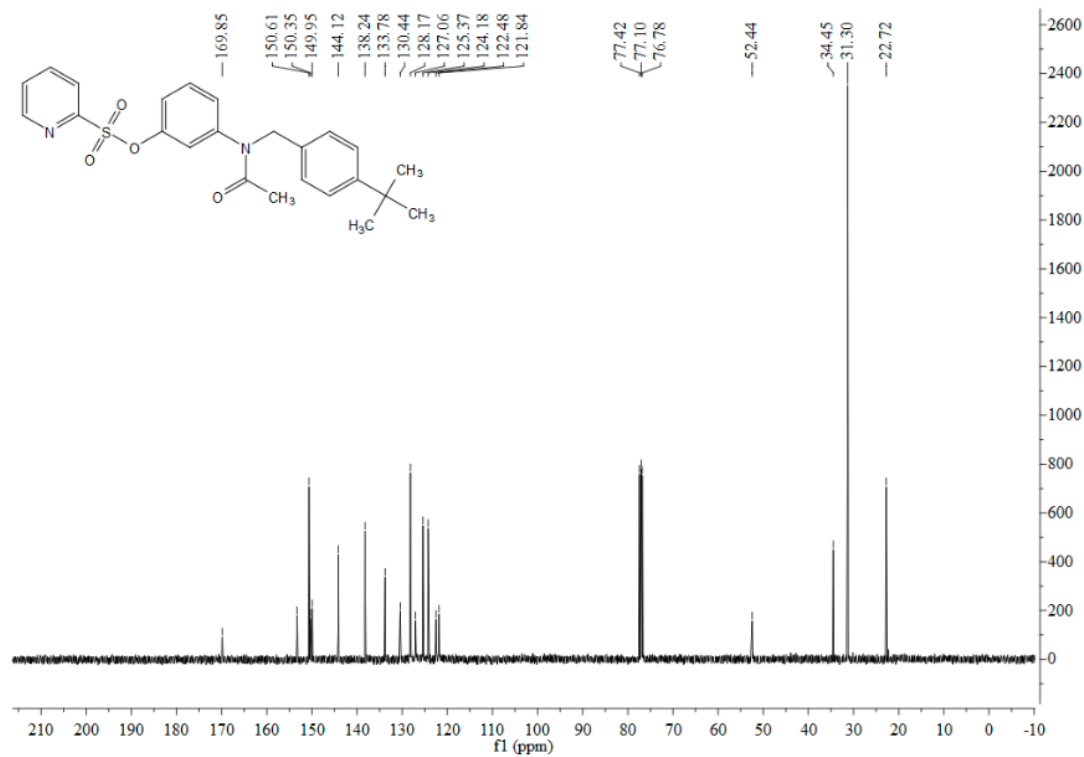

# <sup>1</sup>H NMR spectra of compound **1f**

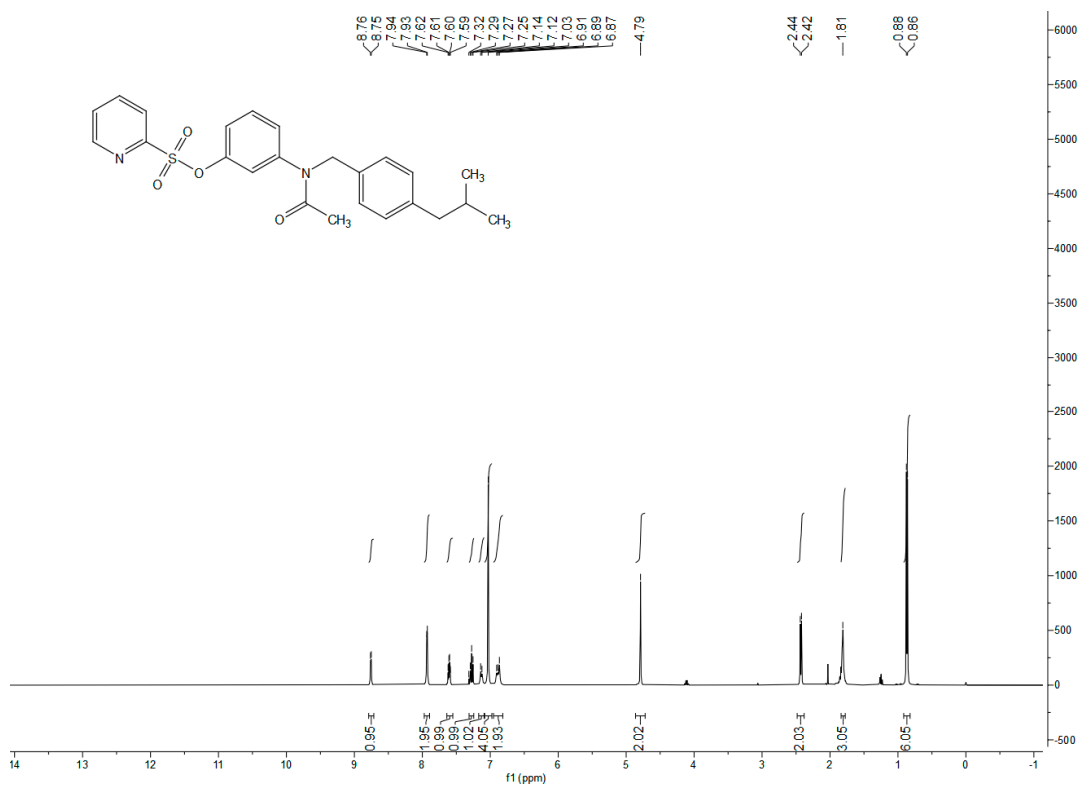

# <sup>13</sup>C NMR spectra of compound **1f**

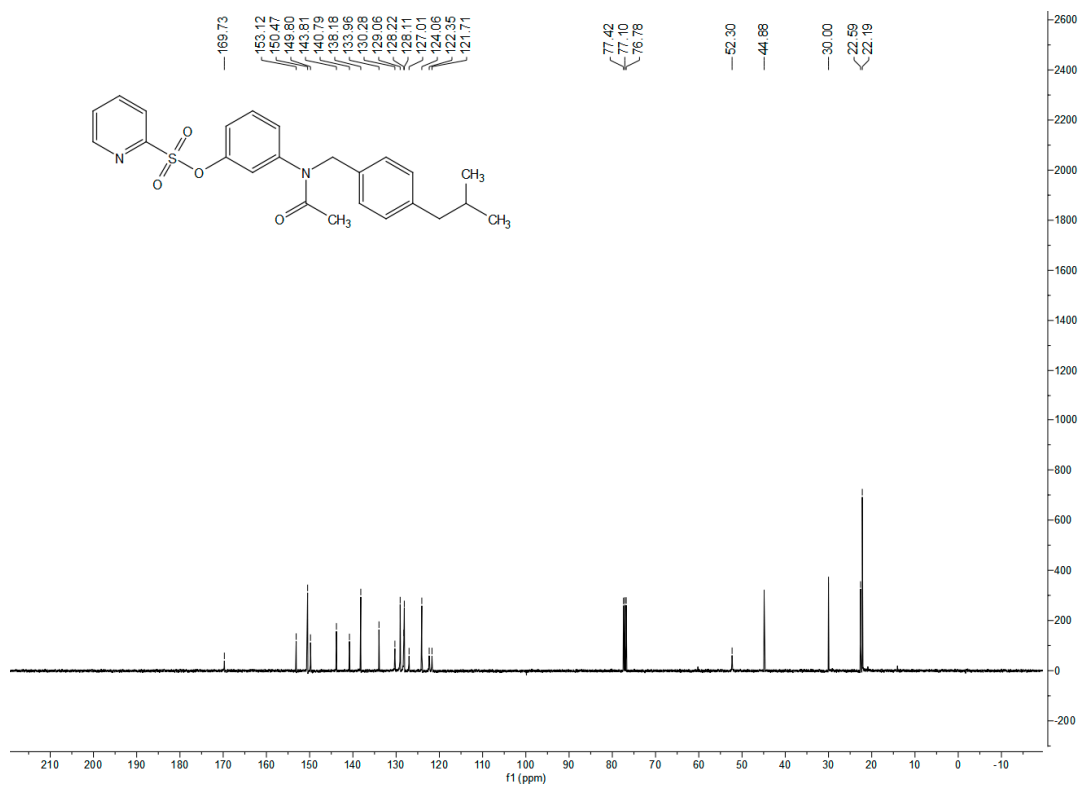

<sup>1</sup>H NMR spectra of compound **1g**

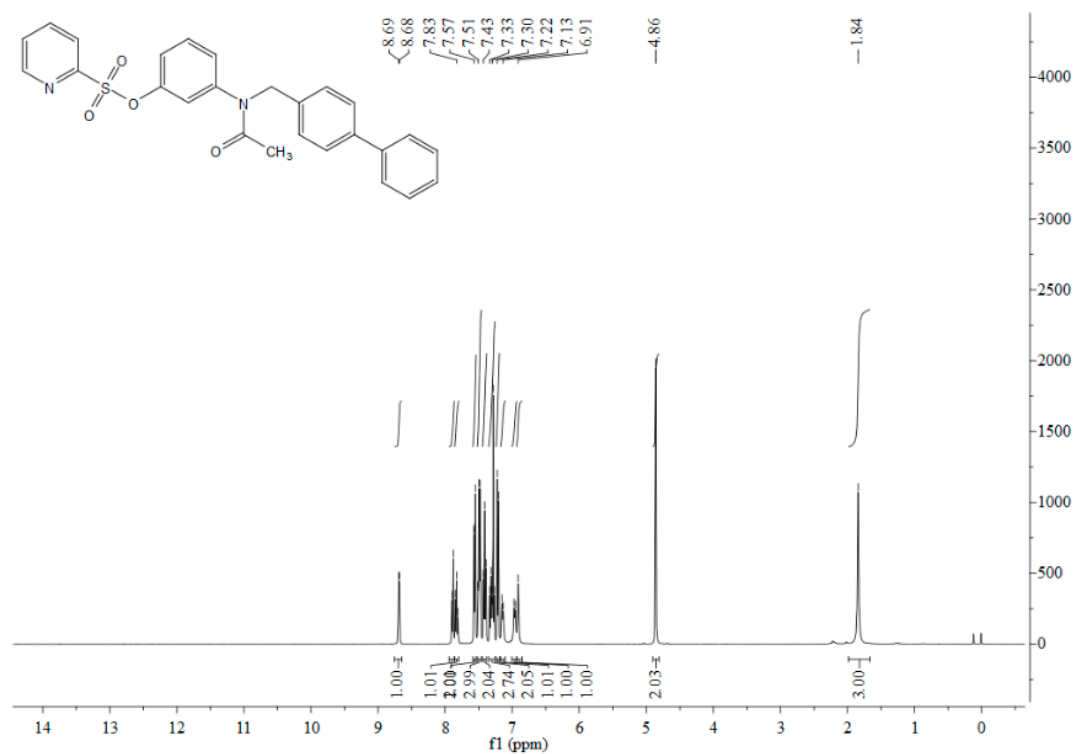

<sup>13</sup>C NMR spectra of compound **1g**

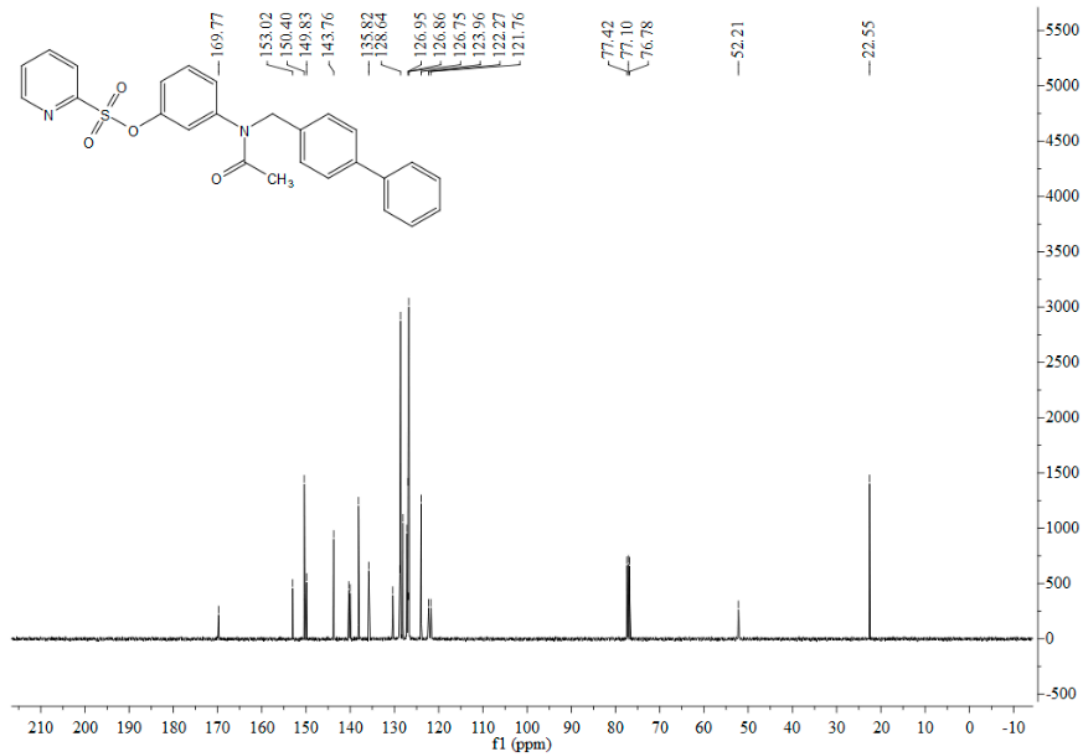

<sup>1</sup>H NMR spectra of compound **1h**

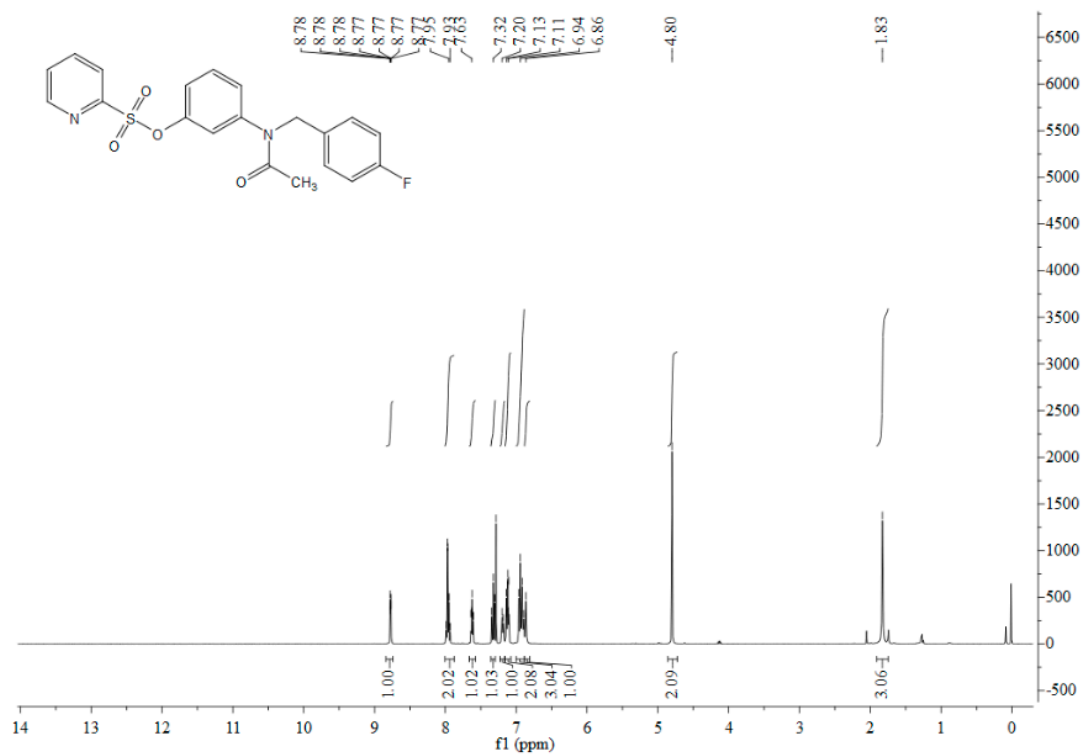

<sup>13</sup>C NMR spectra of compound **1h**

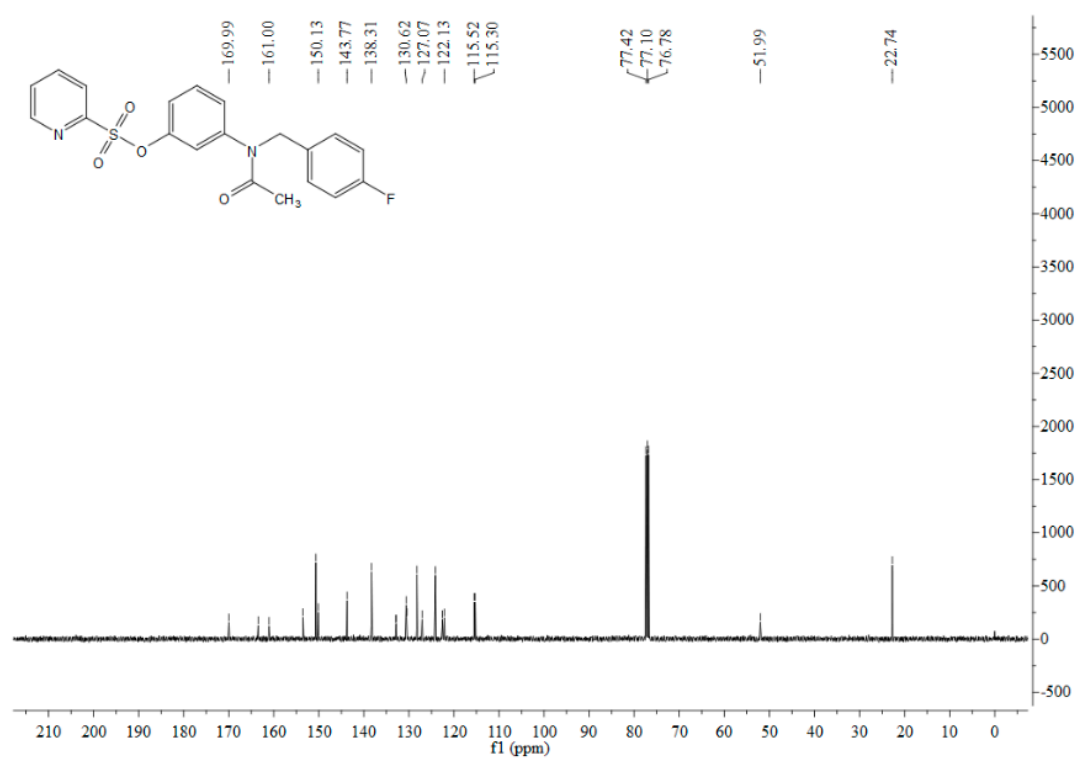

Chemical structure of compound 10 is shown above the spectrum. The spectrum displays peaks corresponding to the following chemical shifts (ppm): 169.94, 153.28, 150.55, 150.01, 143.64, 138.27, 130.60, 130.00, 128.59, 128.19, 126.88, 124.06, 122.36, 122.03, 77.42, 77.10, 76.78, 51.95, and 22.60.

# <sup>1</sup>H NMR spectra of compound **1j**

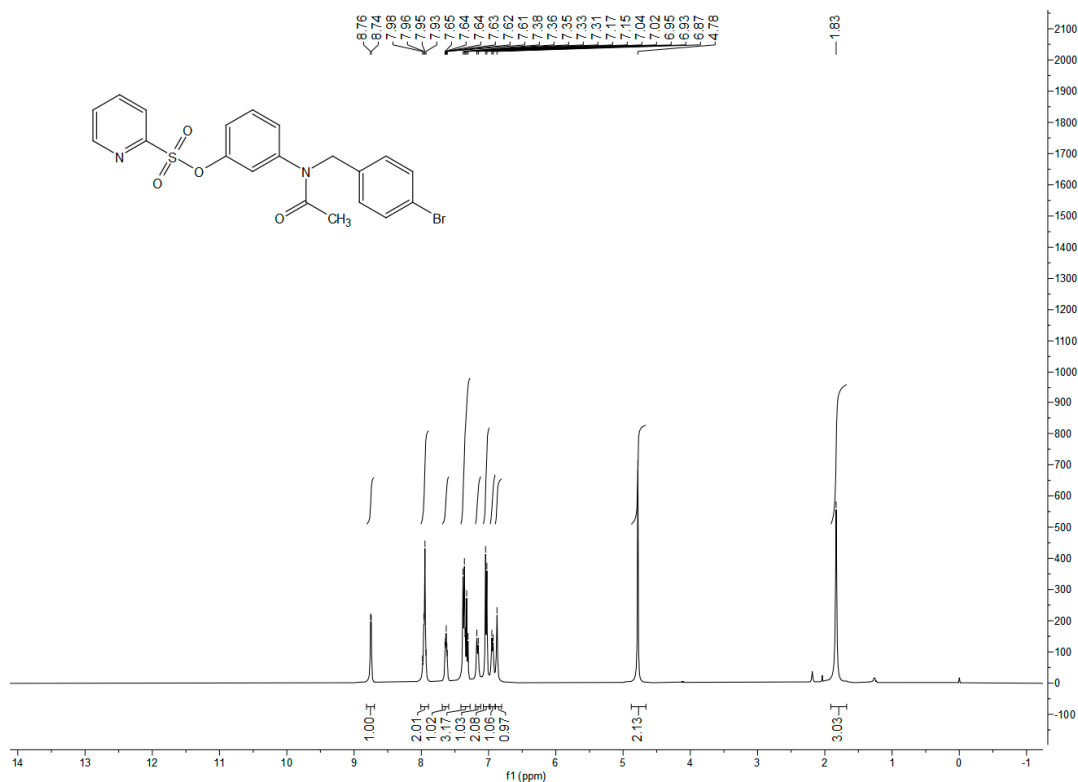

# <sup>13</sup>C NMR spectra of compound **1j**

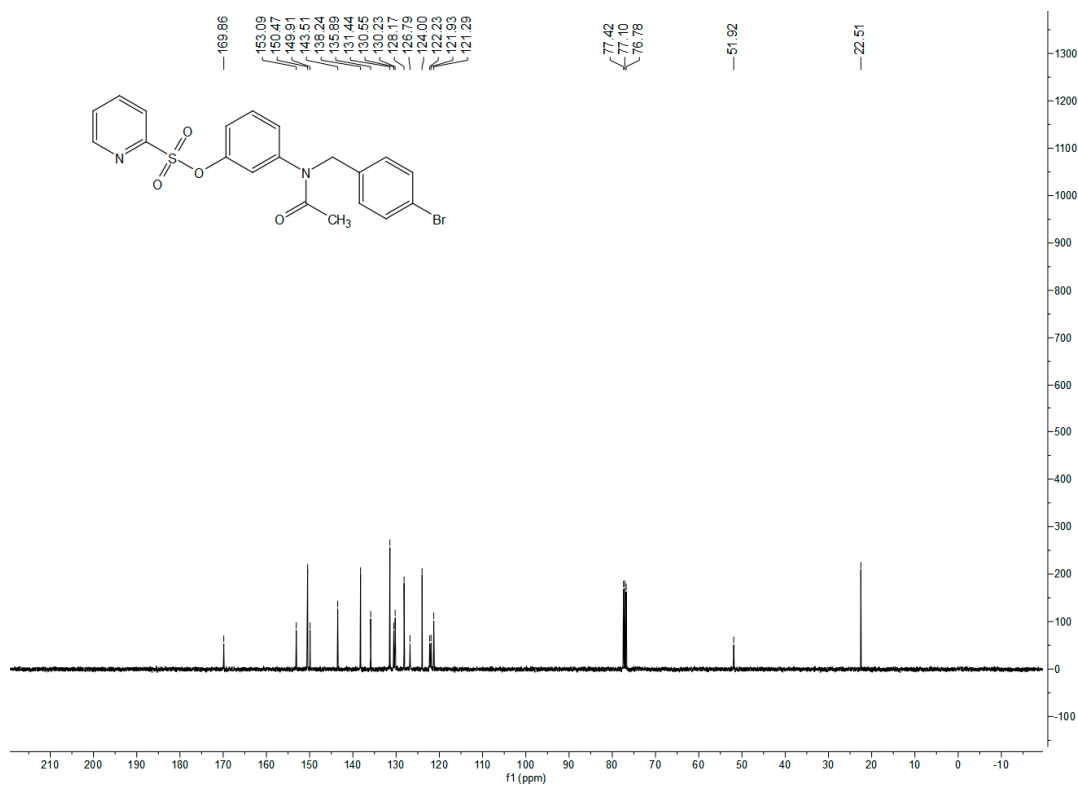

<sup>1</sup>H NMR spectra of compound **1k**

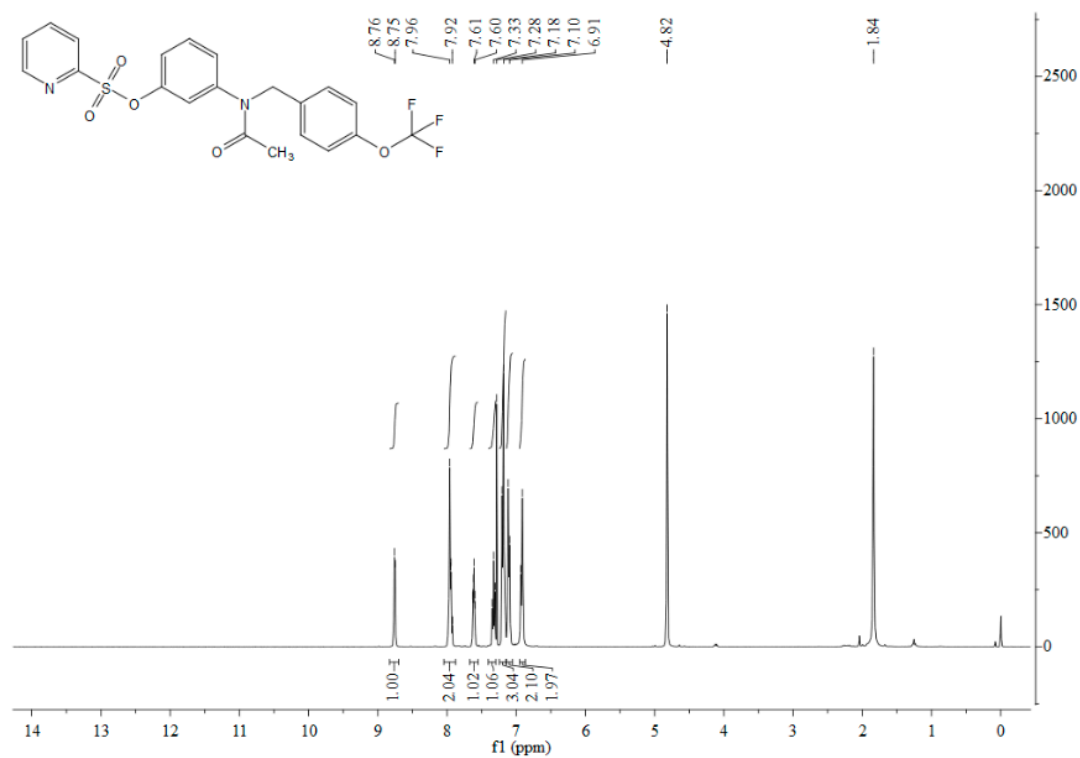

<sup>13</sup>C NMR spectra of compound **1k**

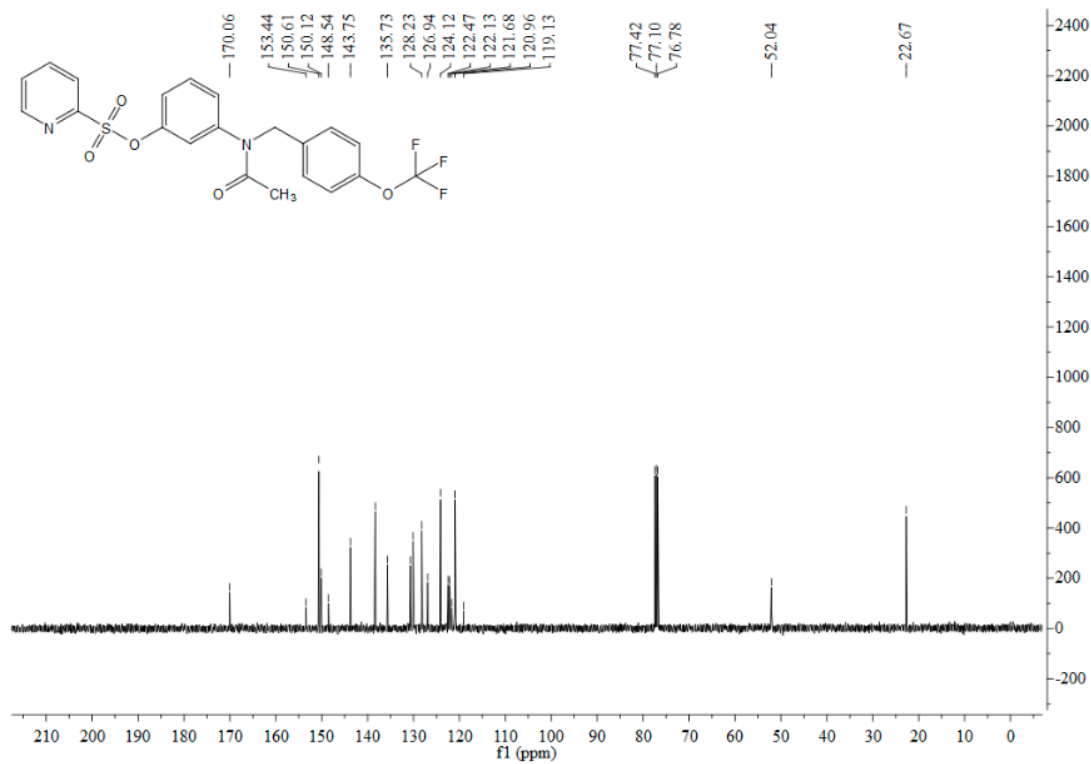



<sup>1</sup>H NMR spectra of compound **11**

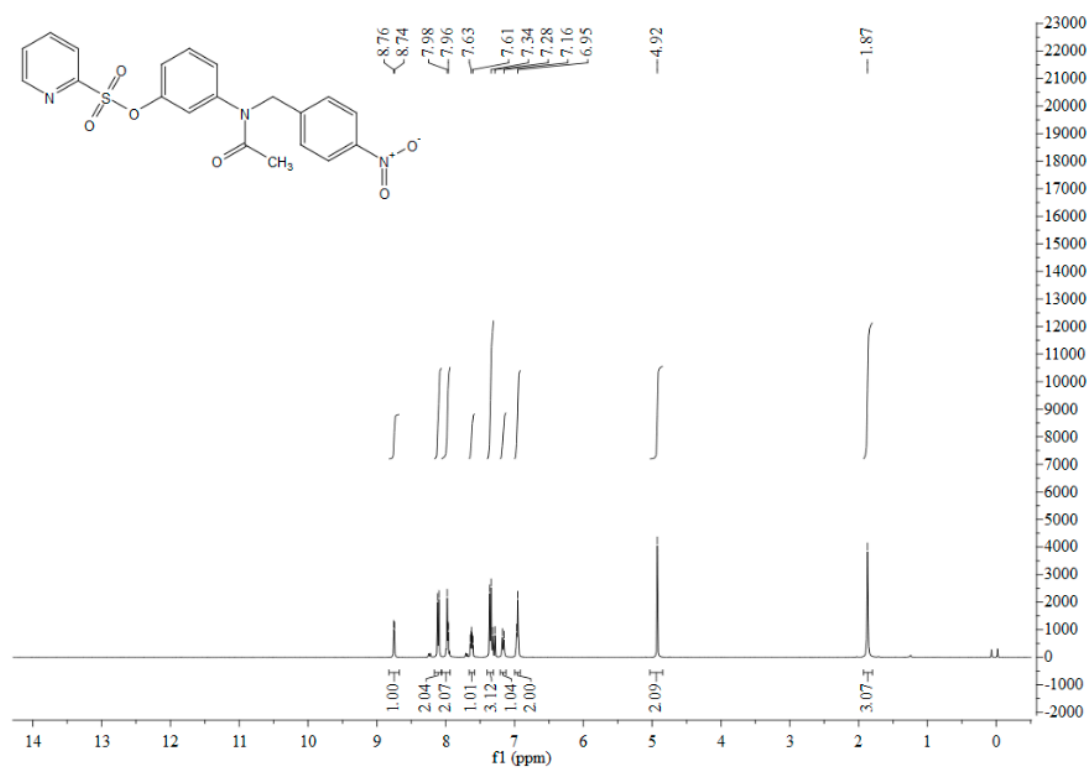

<sup>13</sup>C NMR spectra of compound **11**

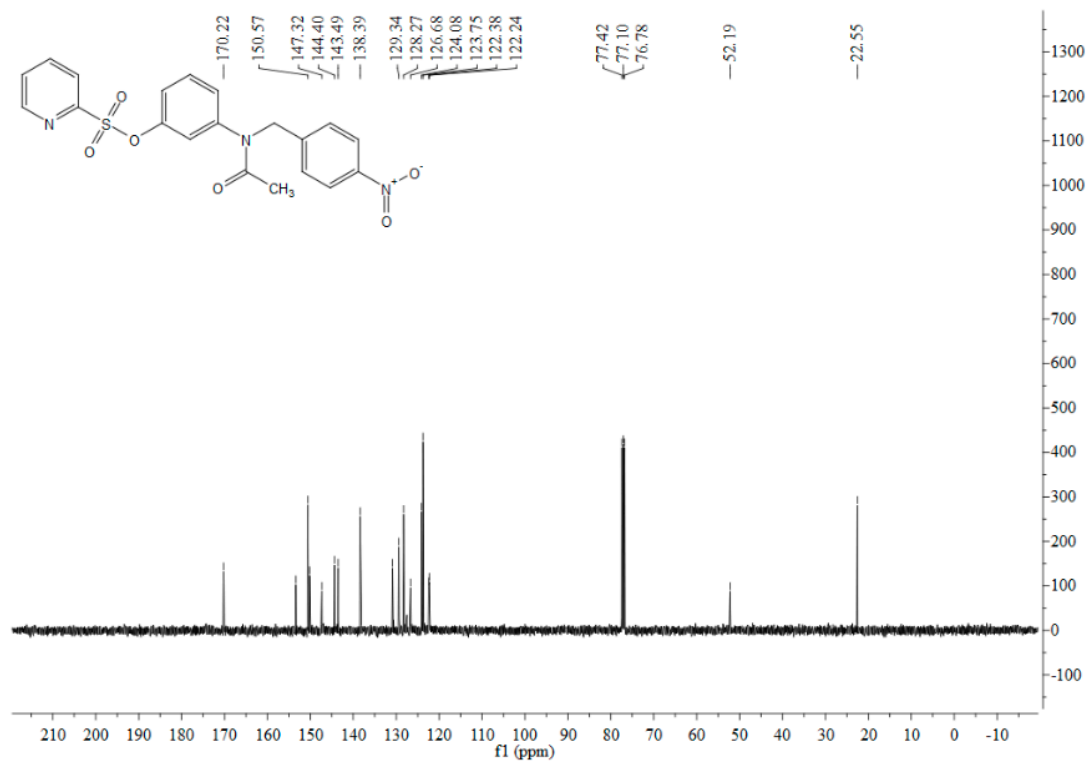

<sup>1</sup>H NMR spectra of compound **1m**

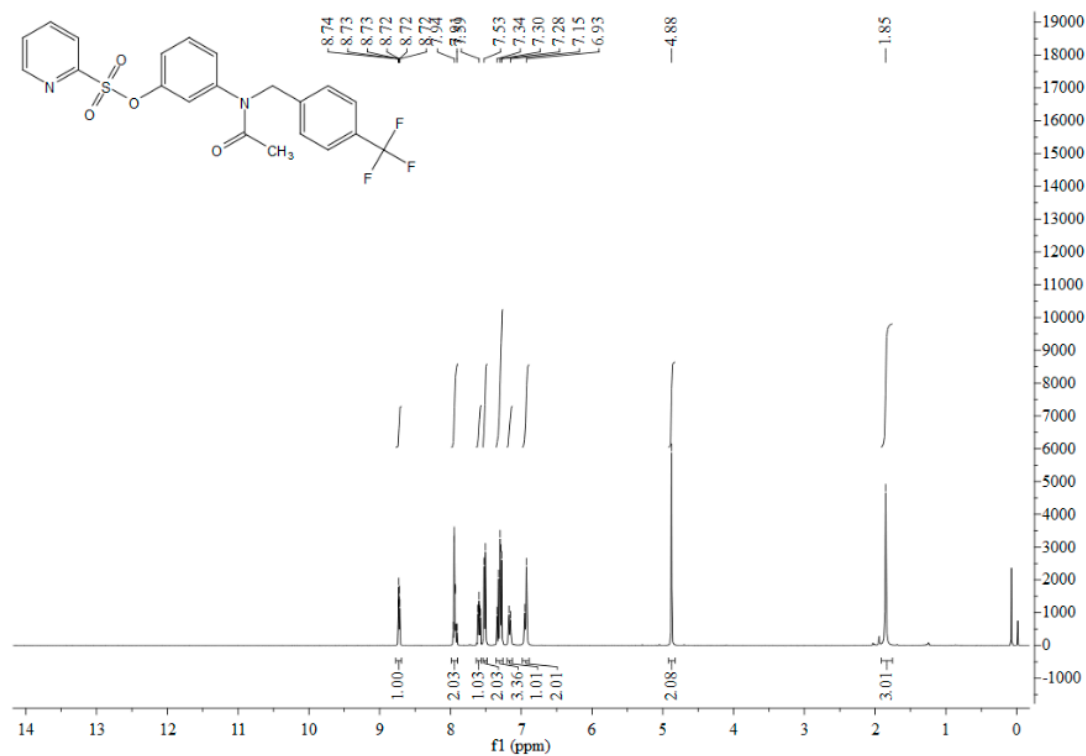

<sup>13</sup>C NMR spectra of compound **1m**

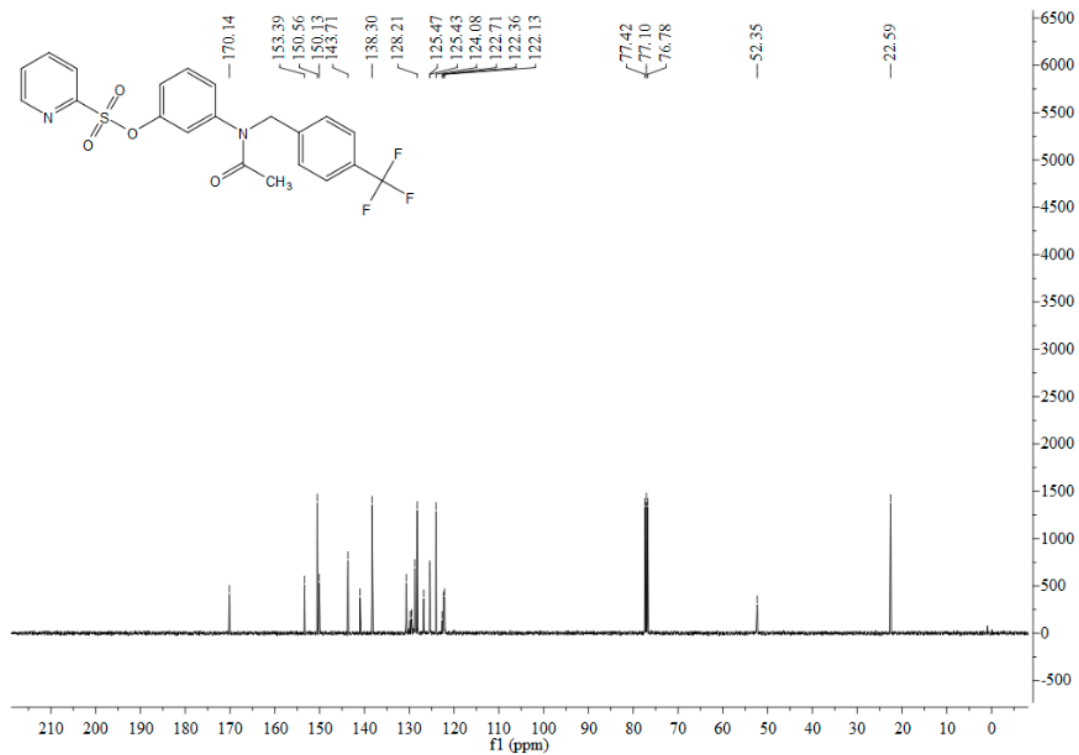

8.75  
8.74  
7.98  
7.97  
7.97  
7.96  
7.96  
7.96  
7.87  
7.85  
7.65  
7.64  
7.63  
7.62  
7.62  
7.40  
7.38  
7.35  
7.33  
7.27  
7.19  
7.17  
6.99  
6.97  
6.91  
4.93

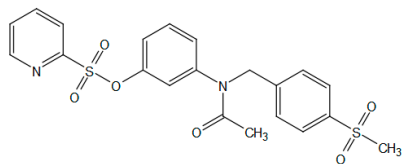

— 169.95

152.73  
150.37  
149.73  
143.24  
143.02  
139.31  
138.30  
130.64  
128.98  
128.26  
127.34  
126.48  
123.90  
122.09  
121.85

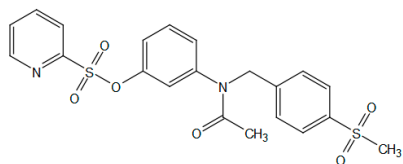

<sup>1</sup>H NMR spectra of compound **1o**

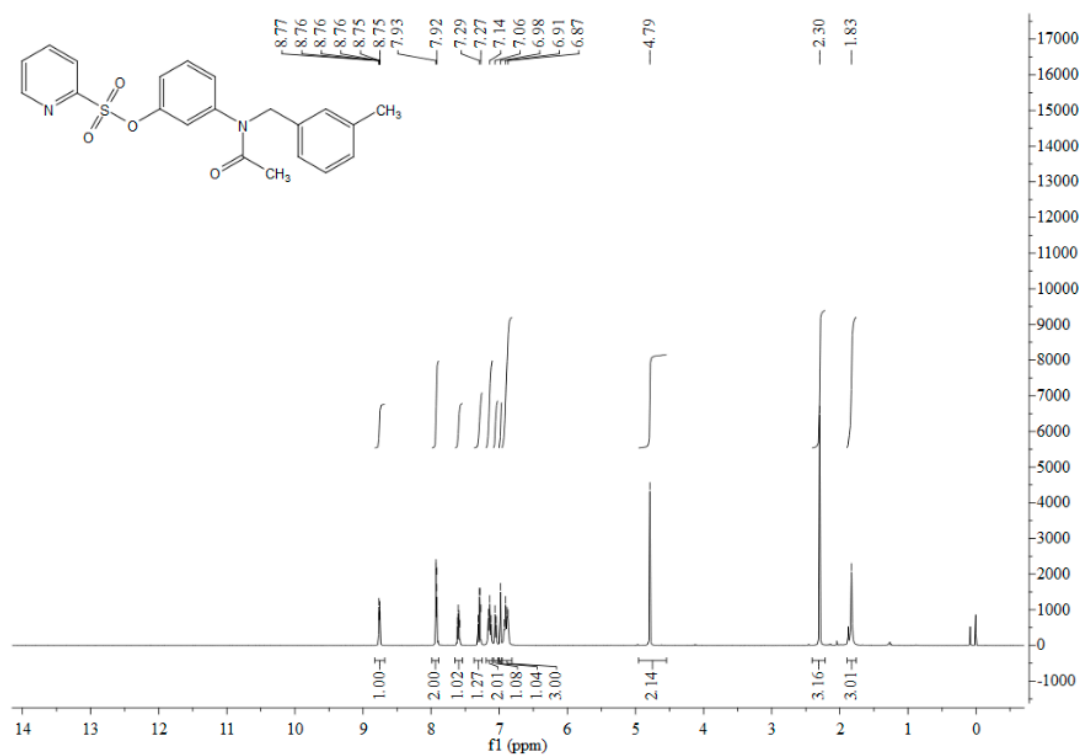

<sup>13</sup>C NMR spectra of compound **1o**

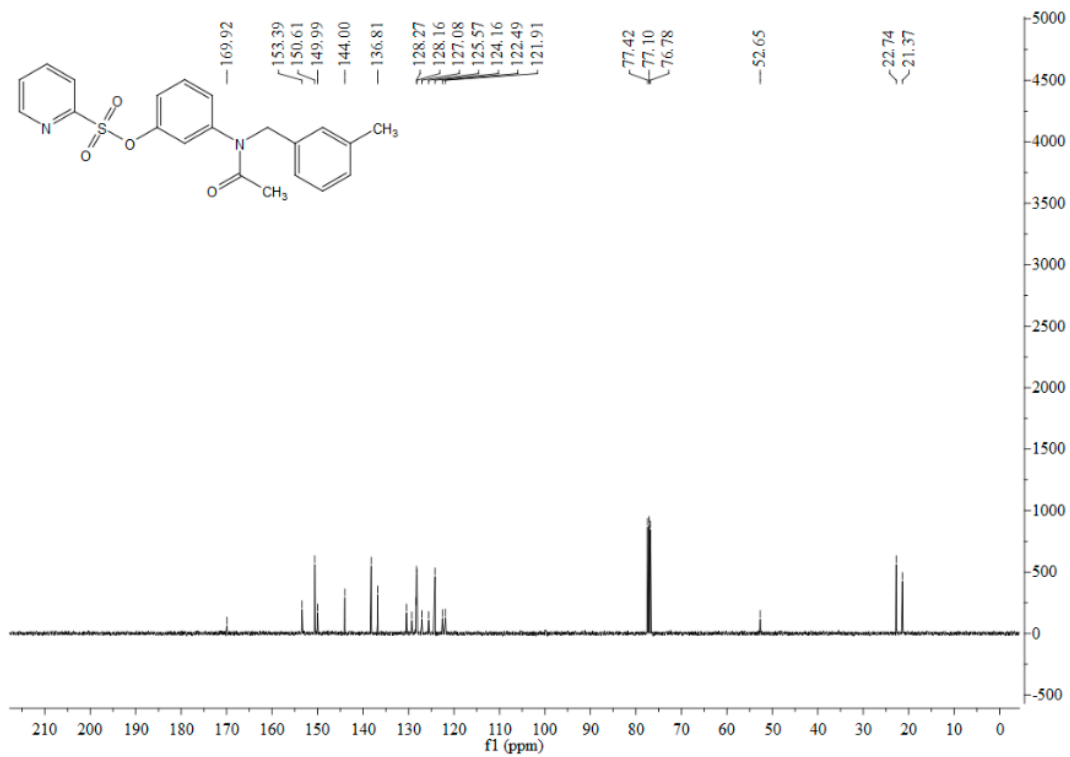

<sup>1</sup>H NMR spectra of compound **1p**

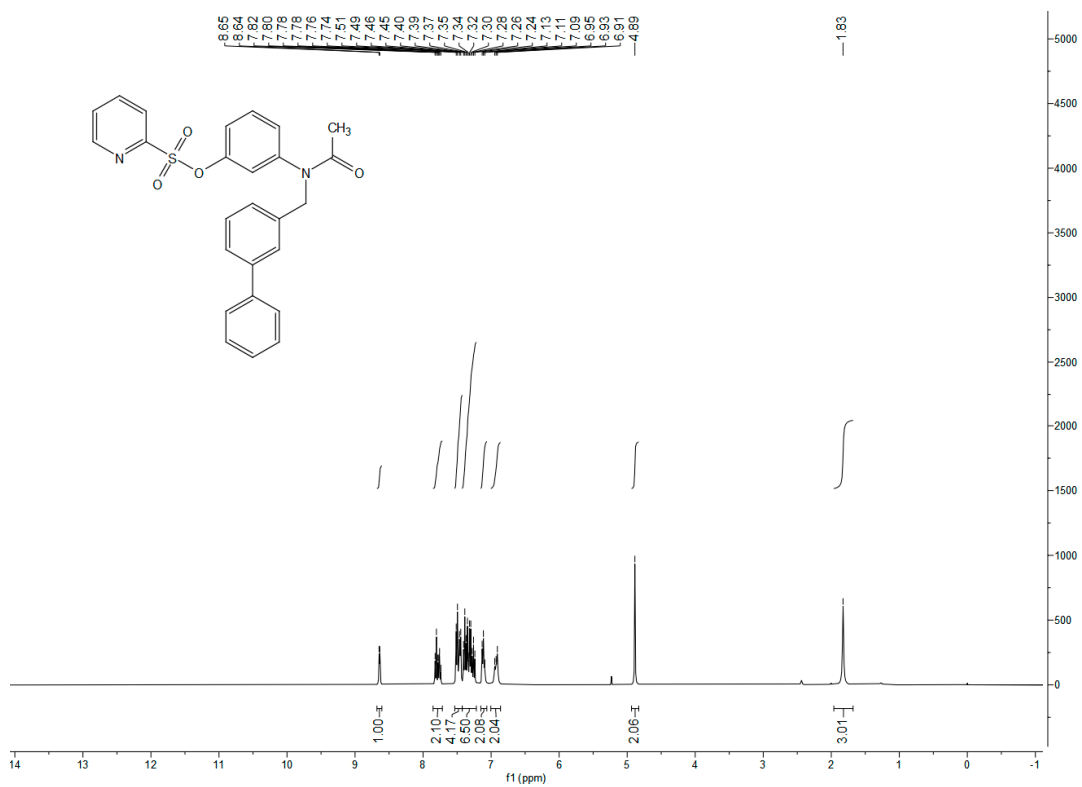

<sup>13</sup>C NMR spectra of compound **1p**

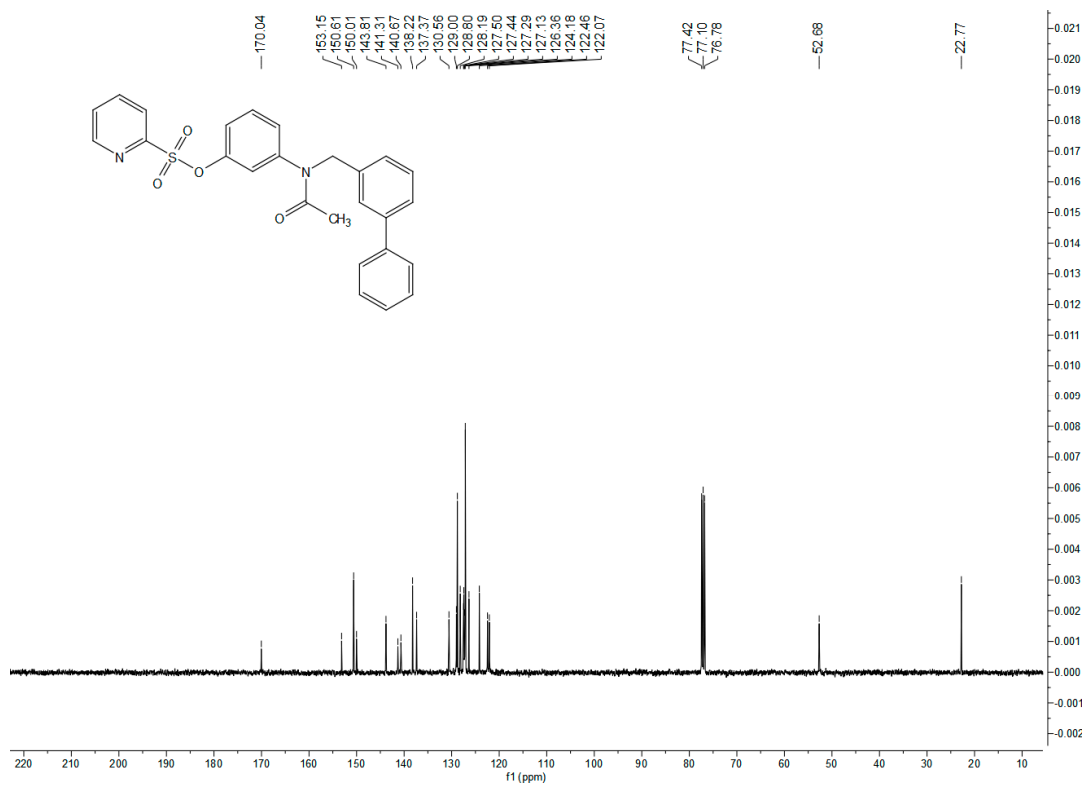

<sup>1</sup>H NMR spectra of compound **1q**

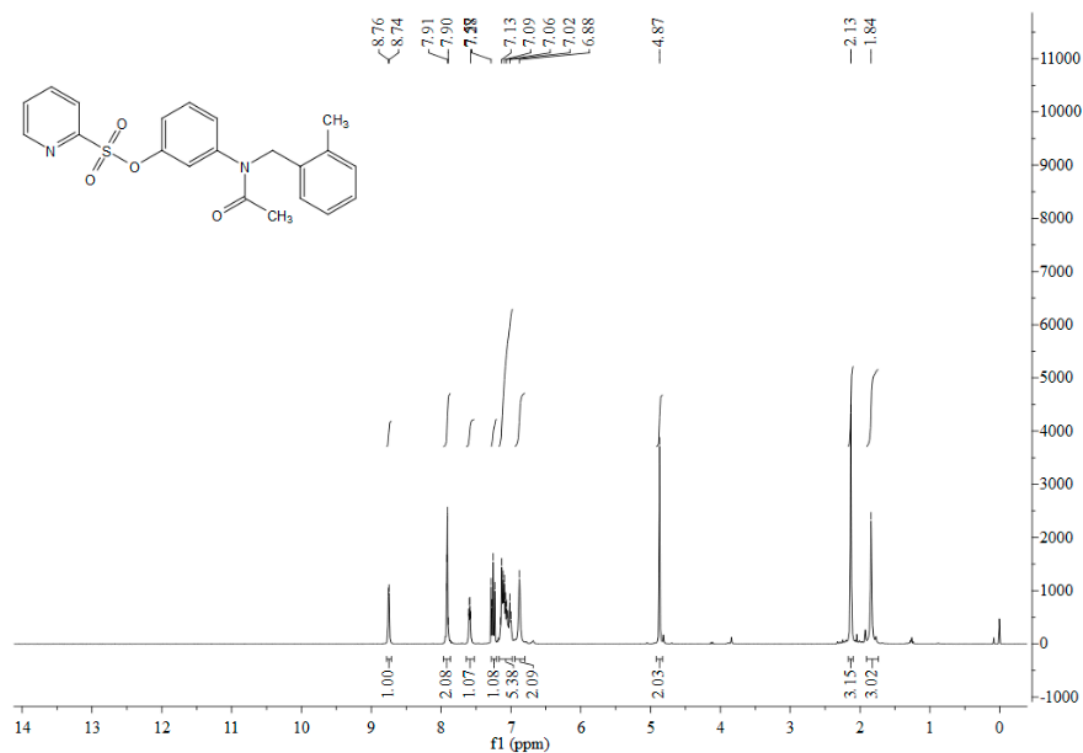

<sup>13</sup>C NMR spectra of compound **1q**

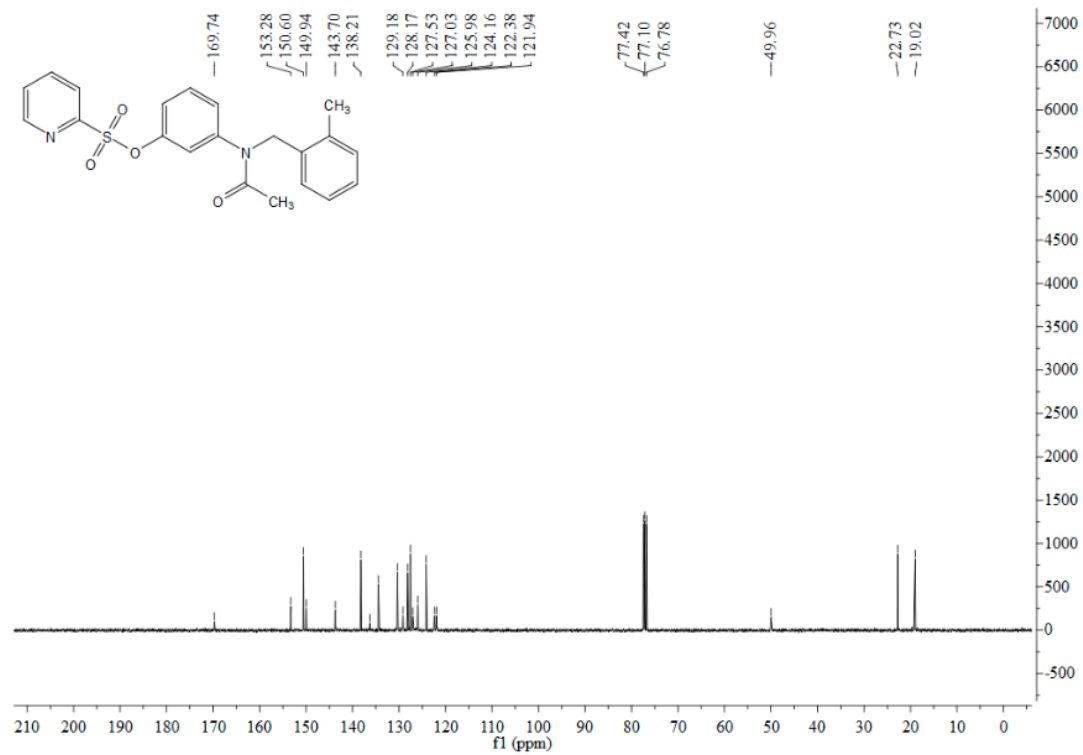

# <sup>1</sup>H NMR spectra of compound 1r

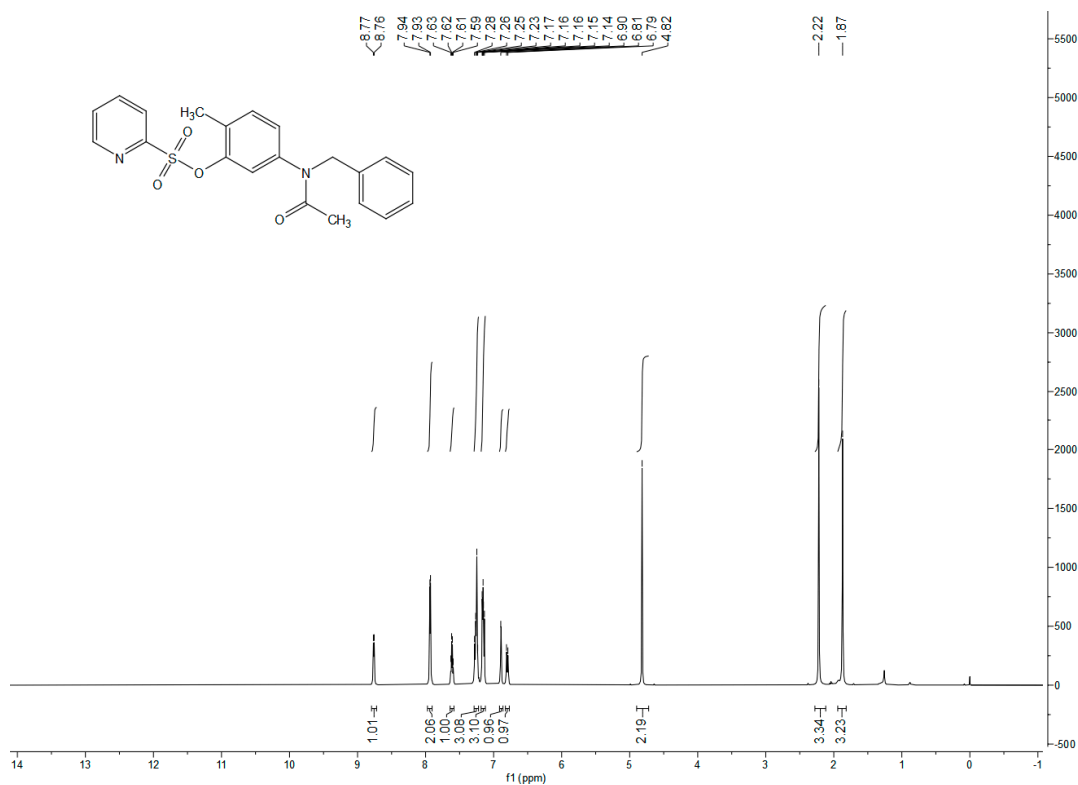

# <sup>13</sup>C NMR spectra of compound 1r

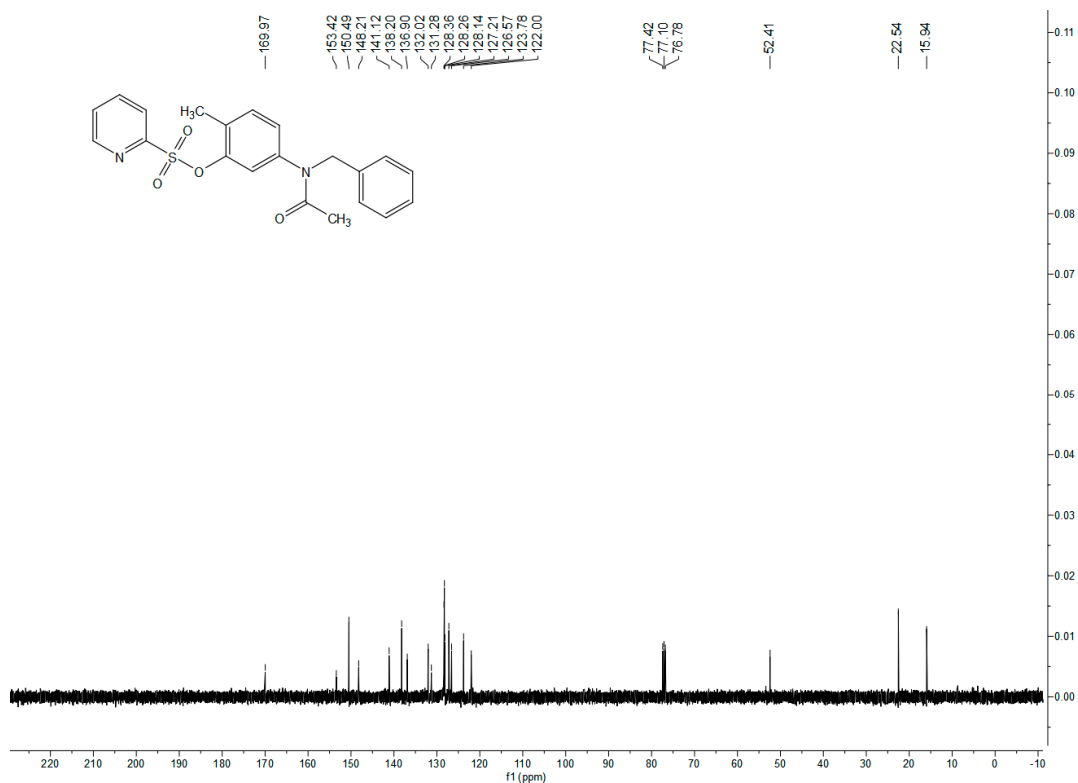

<sup>1</sup>H NMR spectra of compound **1s**

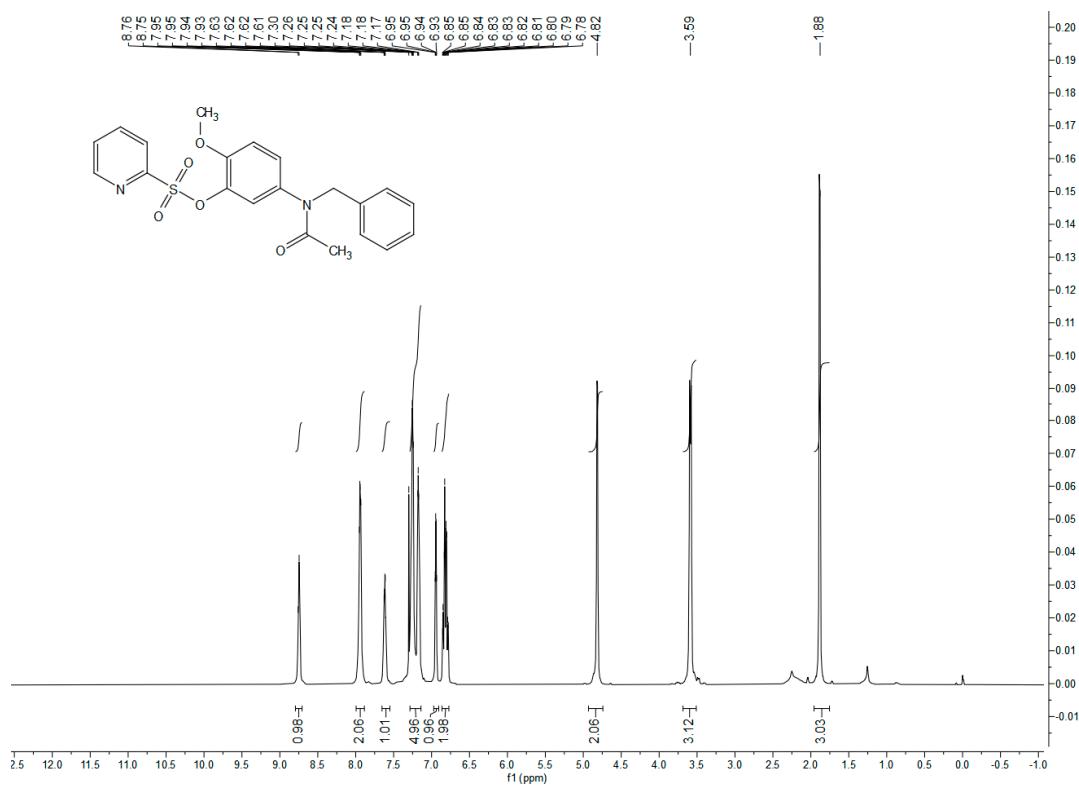

<sup>13</sup>C NMR spectra of compound **1s**

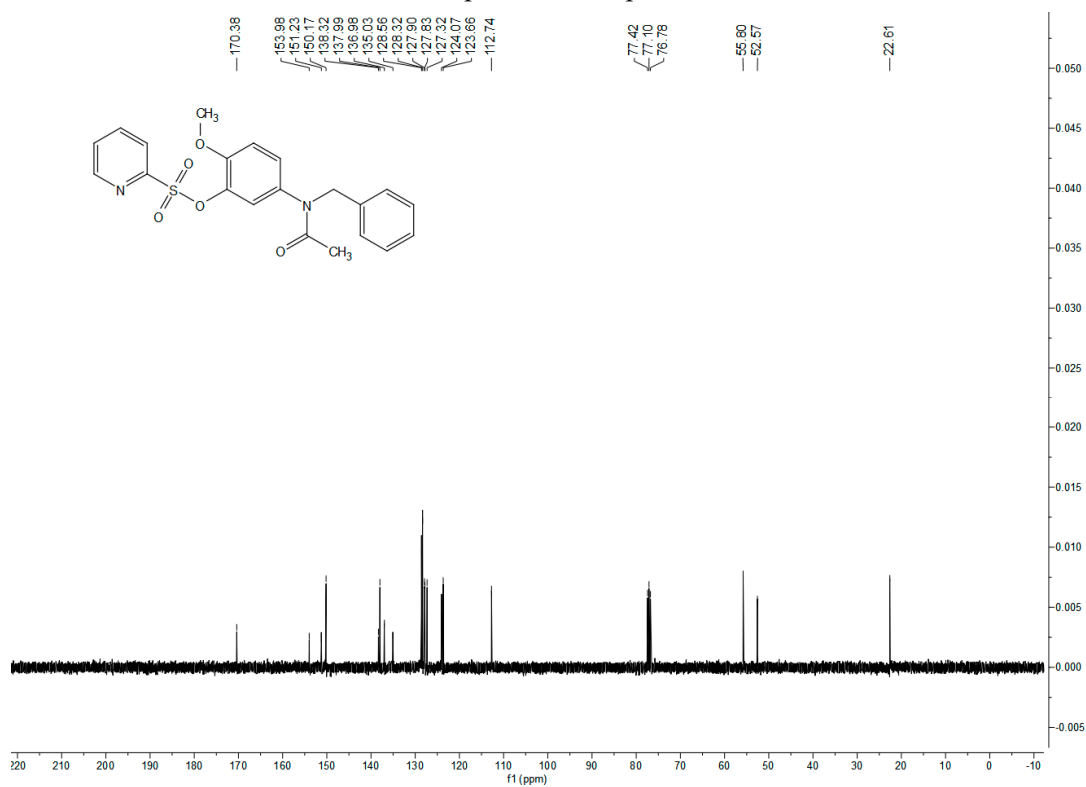



### <sup>1</sup>H NMR spectra of compound **1t**

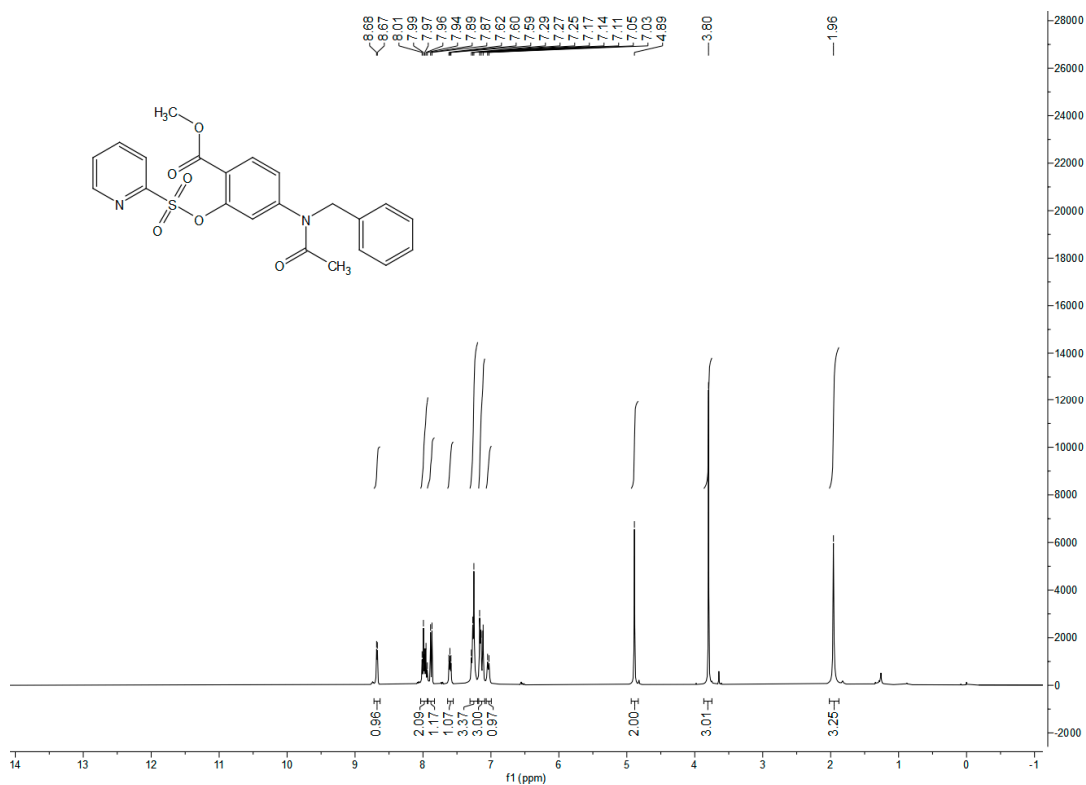<sup>13</sup>C NMR spectra of compound **1t**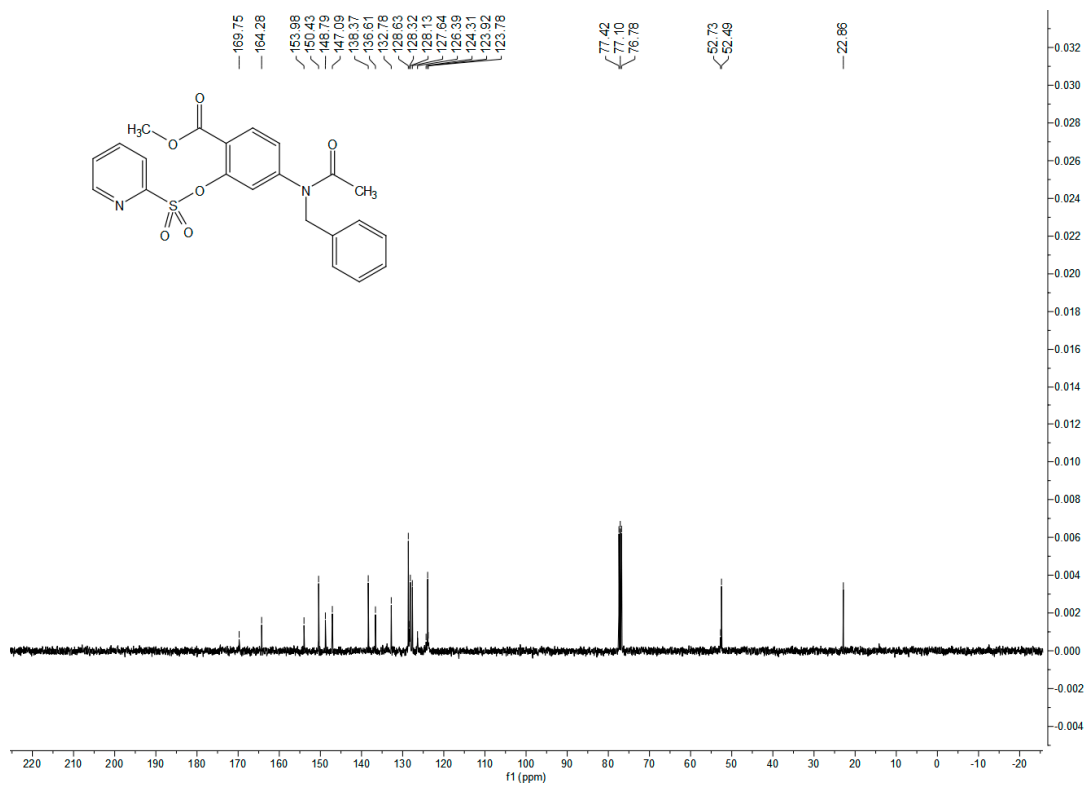

5. Spectral copies of products  $^1\text{H}$  NMR and  $^{13}\text{C}$  NMR

$^1\text{H}$  NMR spectra of compound **2a**

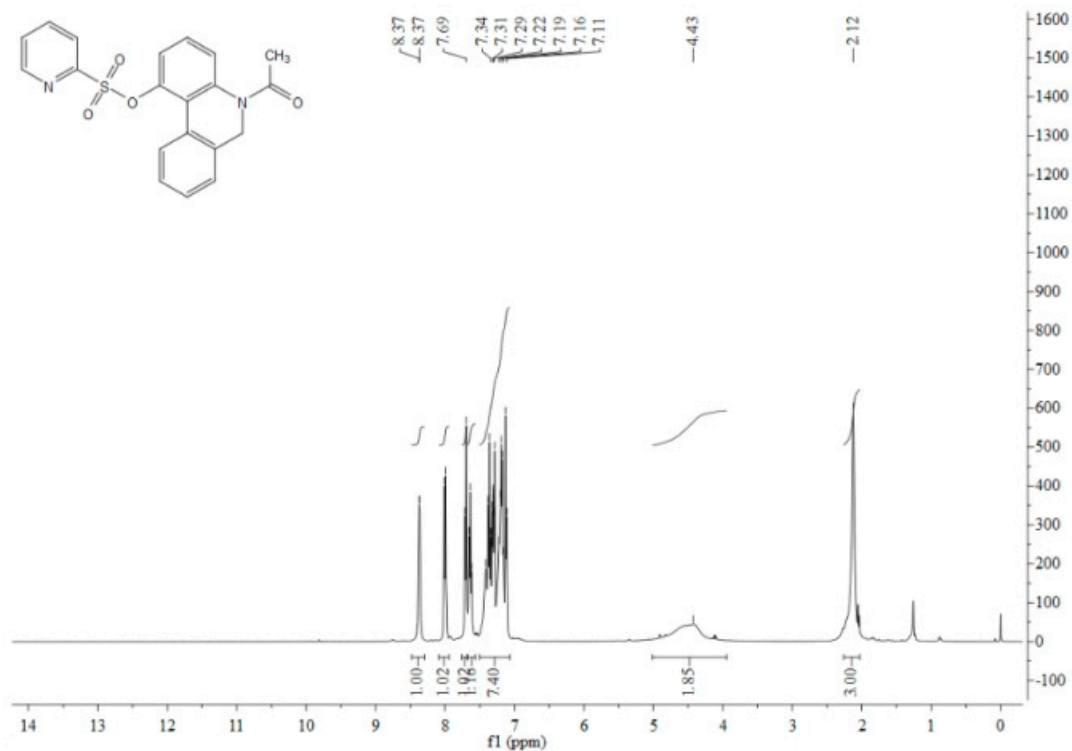

$^{13}\text{C}$  NMR spectra of compound **2a**

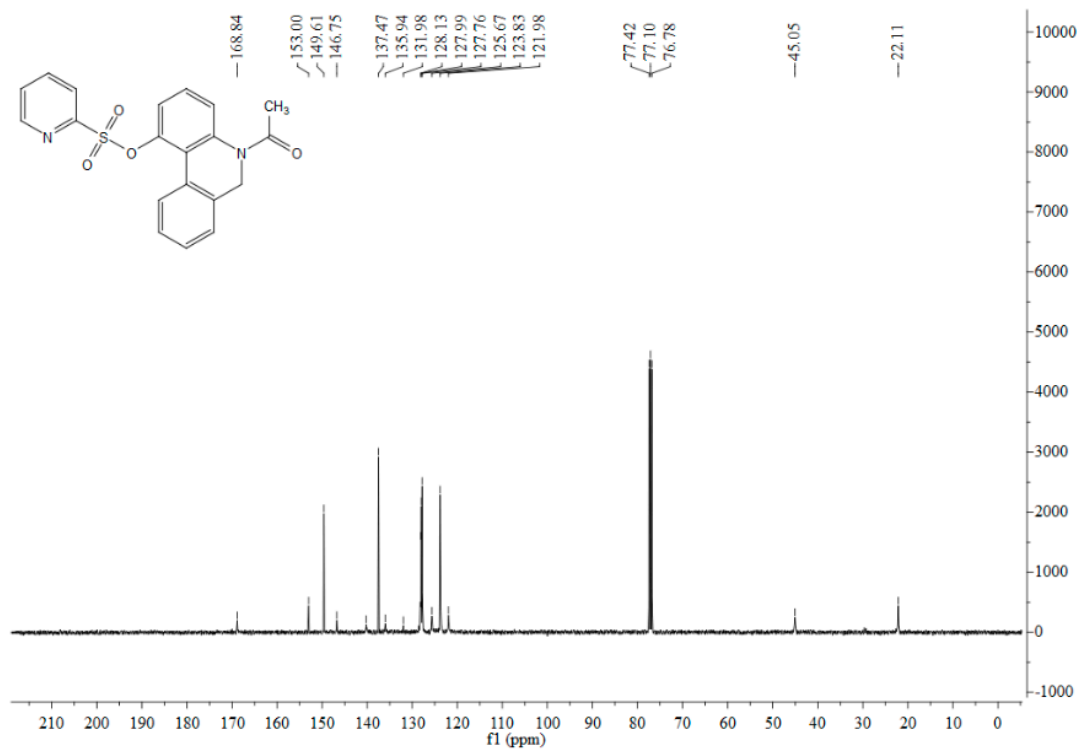

<sup>1</sup>H NMR spectra of compound **2b**

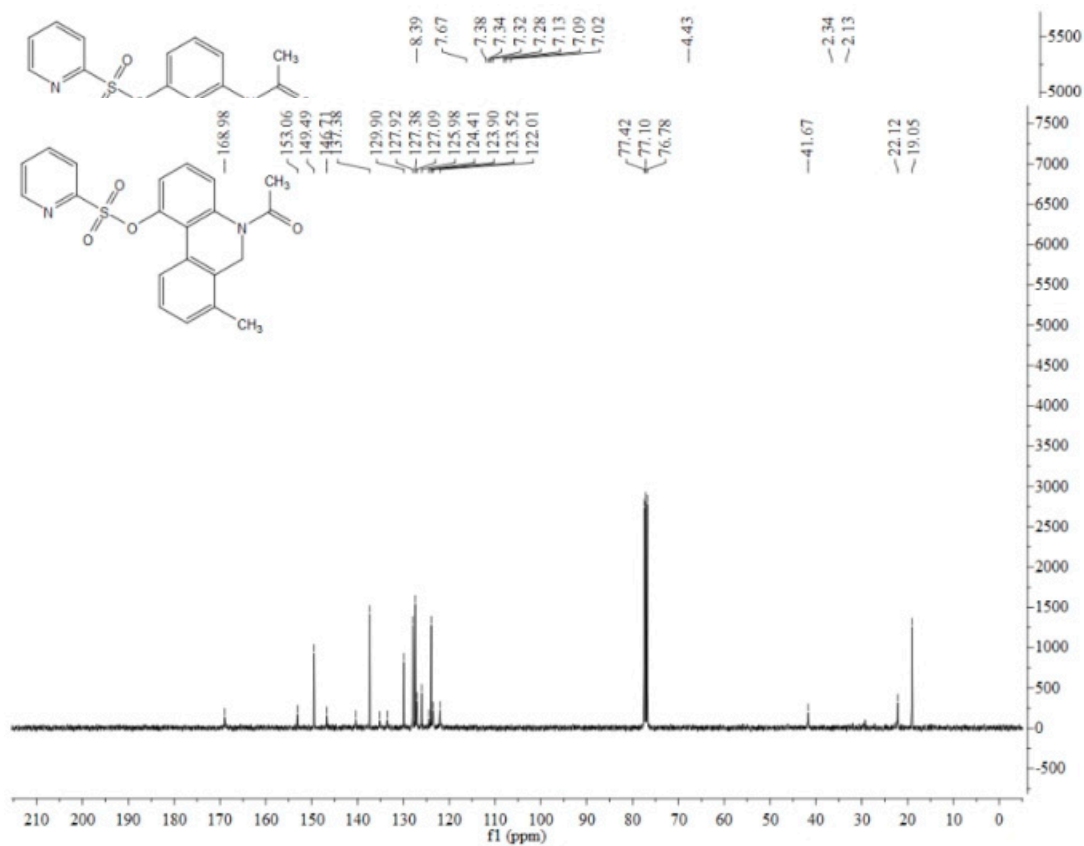

<sup>13</sup>C NMR spectra of compound **2b**

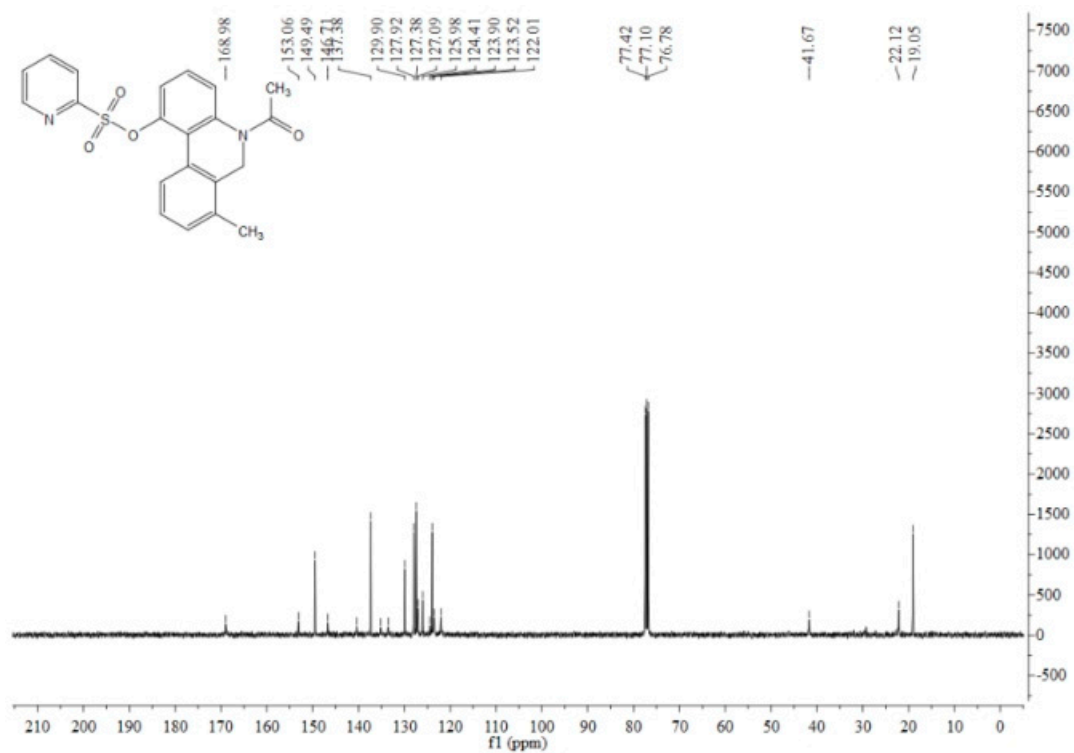

<sup>1</sup>H NMR spectra of compound **2c**

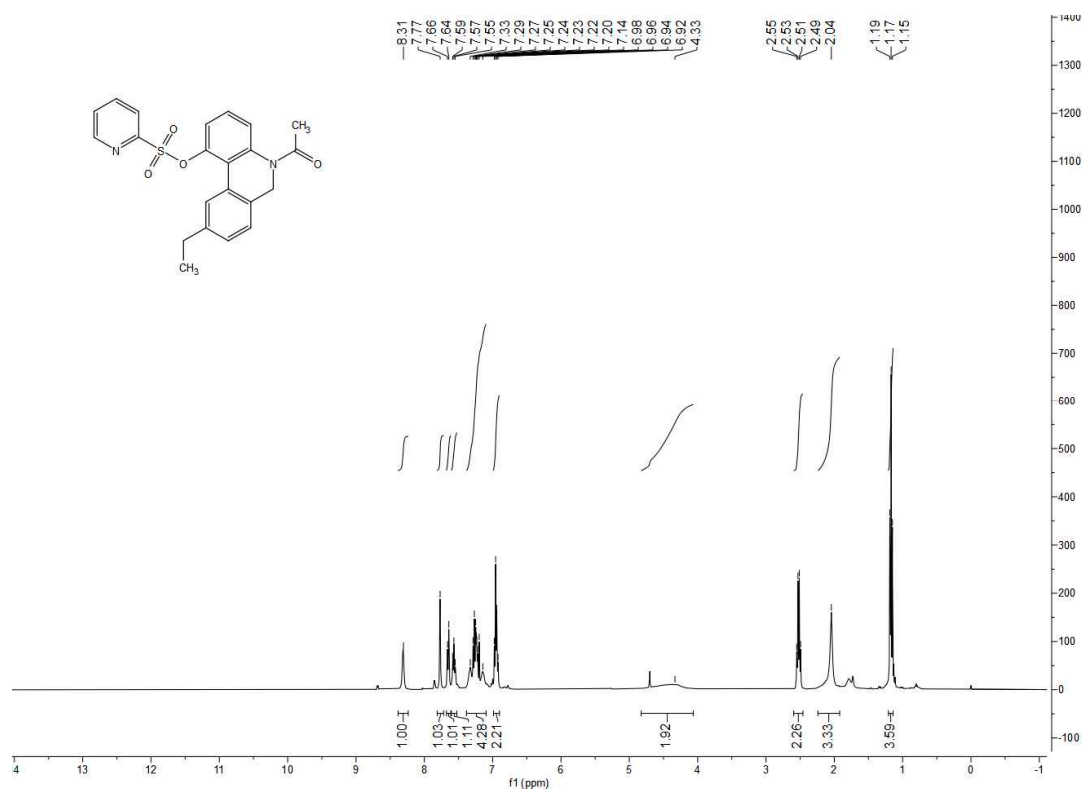

<sup>13</sup>C NMR spectra of compound **2c**

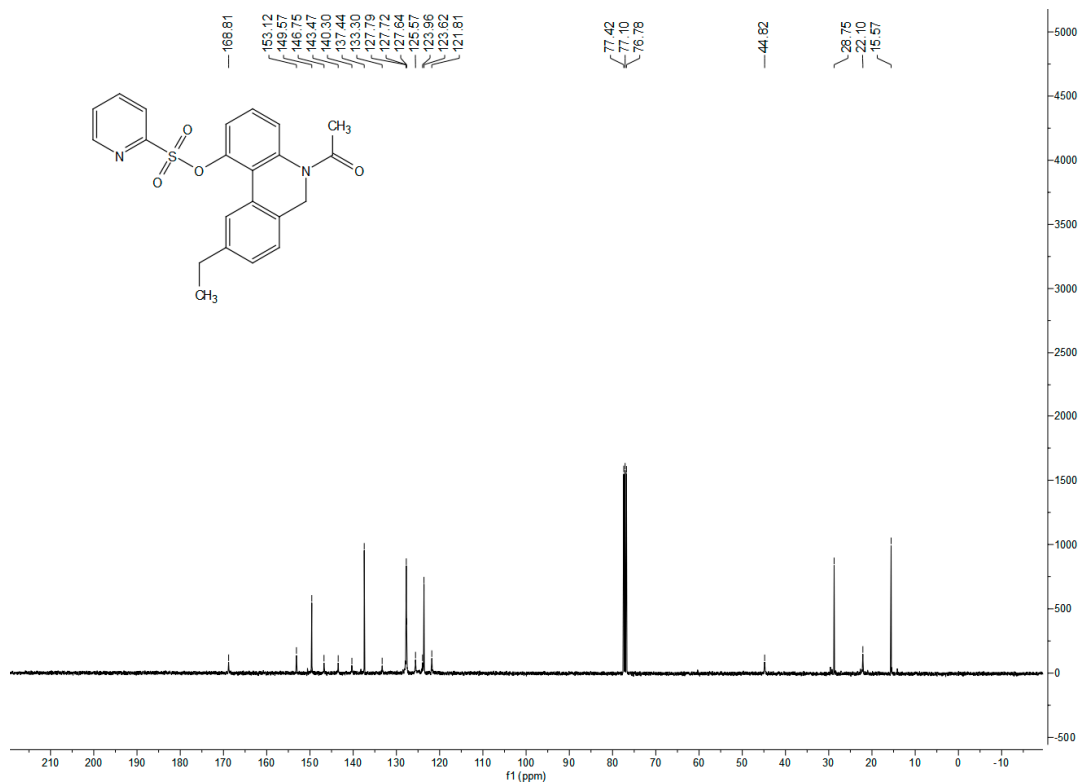

<sup>1</sup>H NMR spectra of compound **2d**

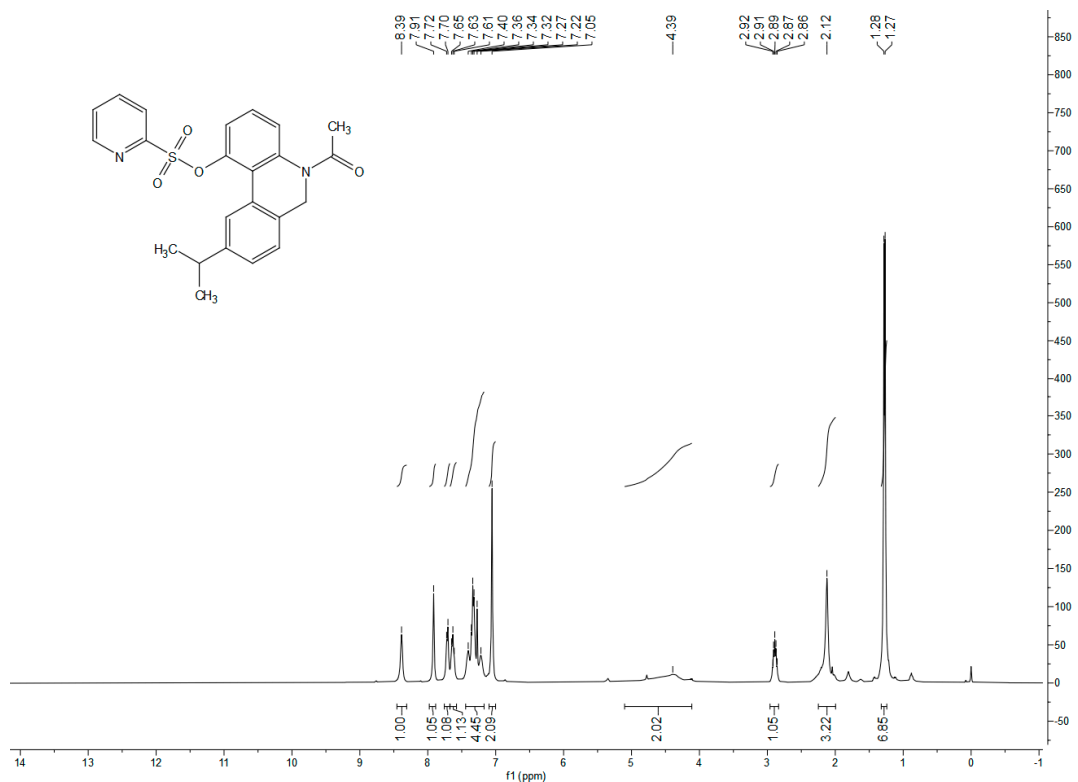

<sup>13</sup>C NMR spectra of compound **2d**

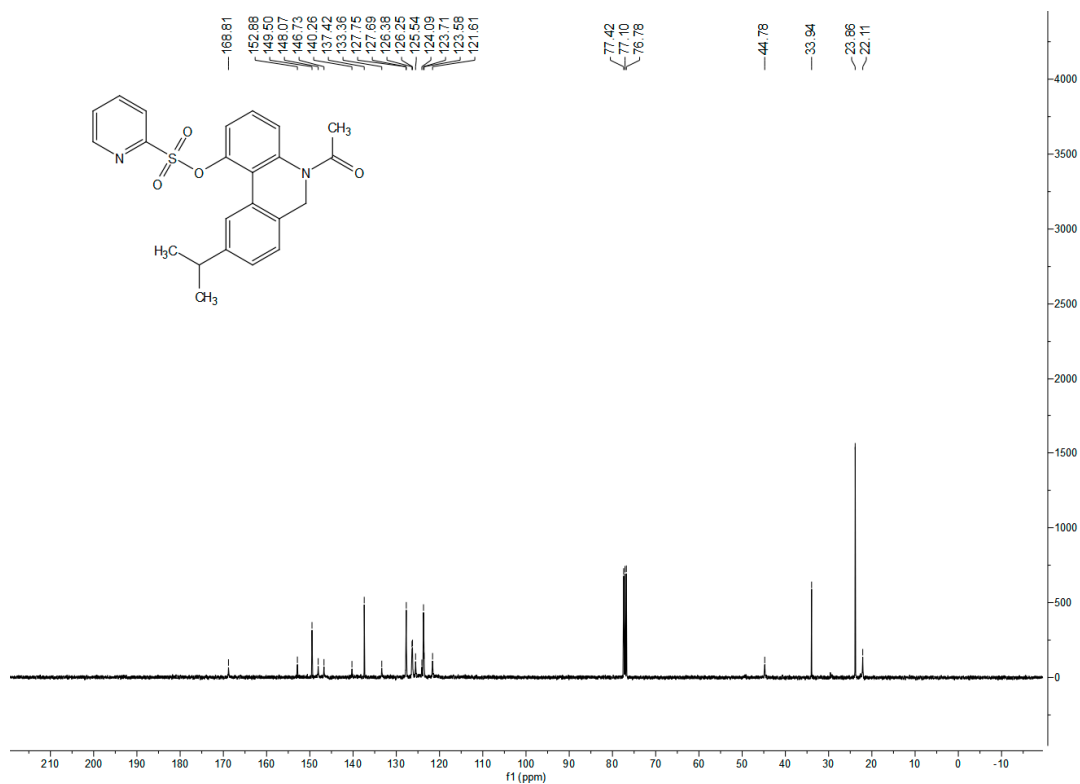

<sup>1</sup>H NMR spectra of compound 2e

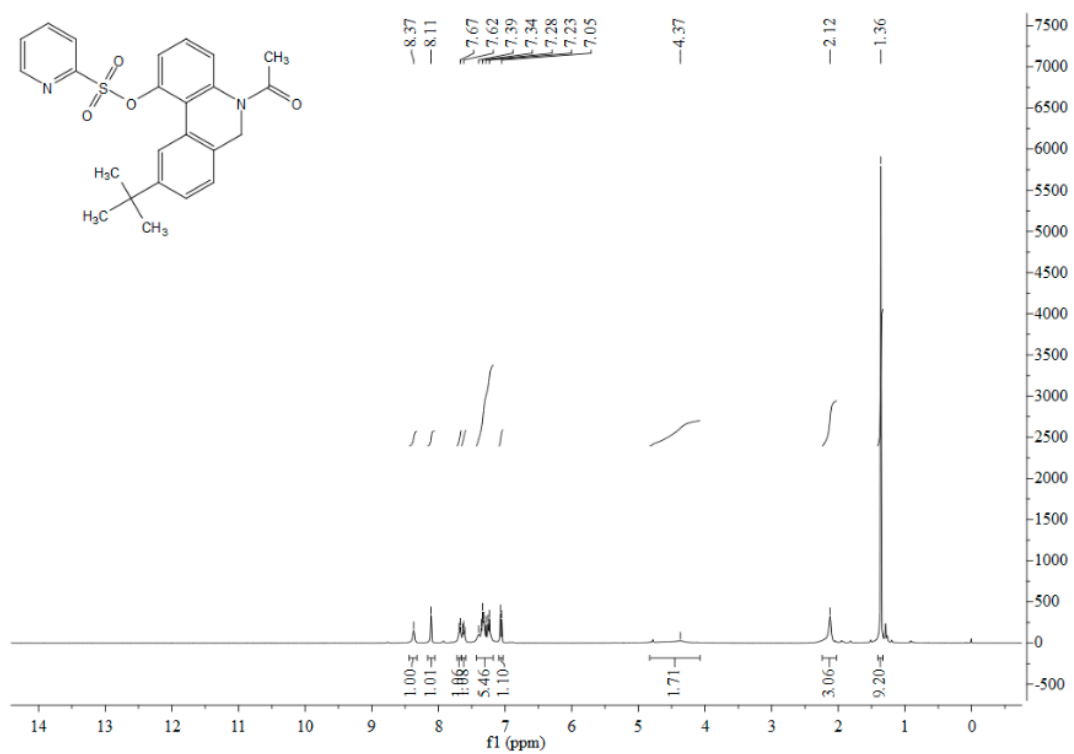

<sup>13</sup>C NMR spectra of compound 2e

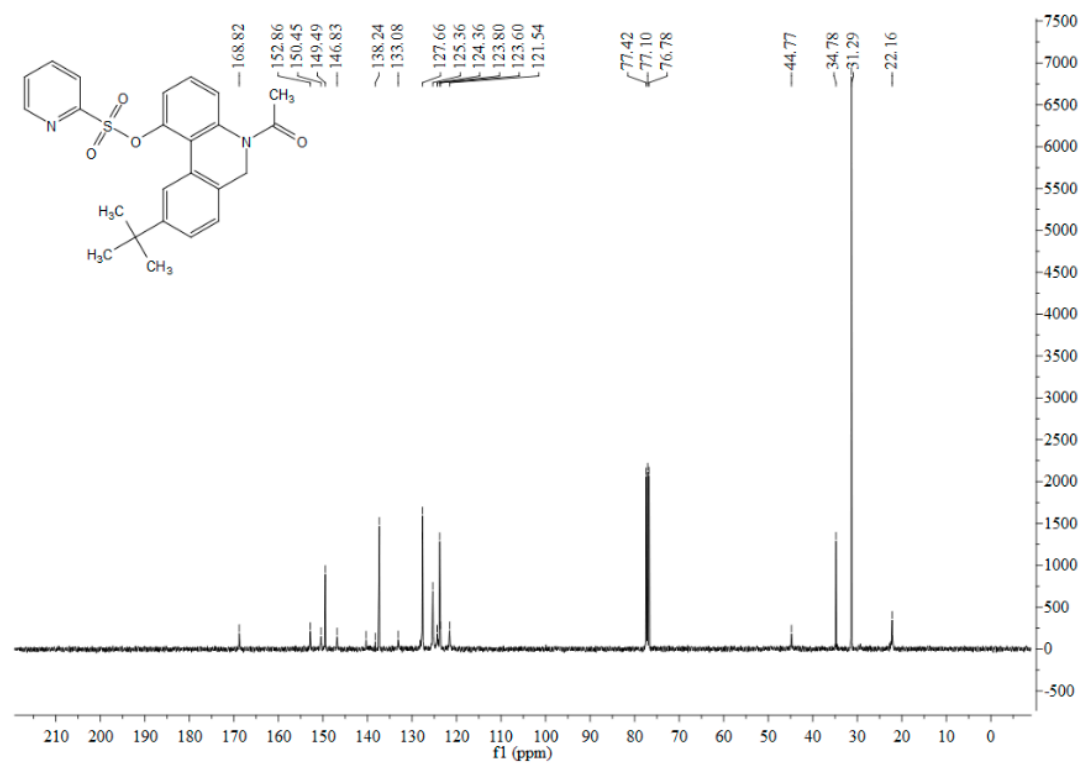

<sup>1</sup>H NMR spectra of compound **2f**

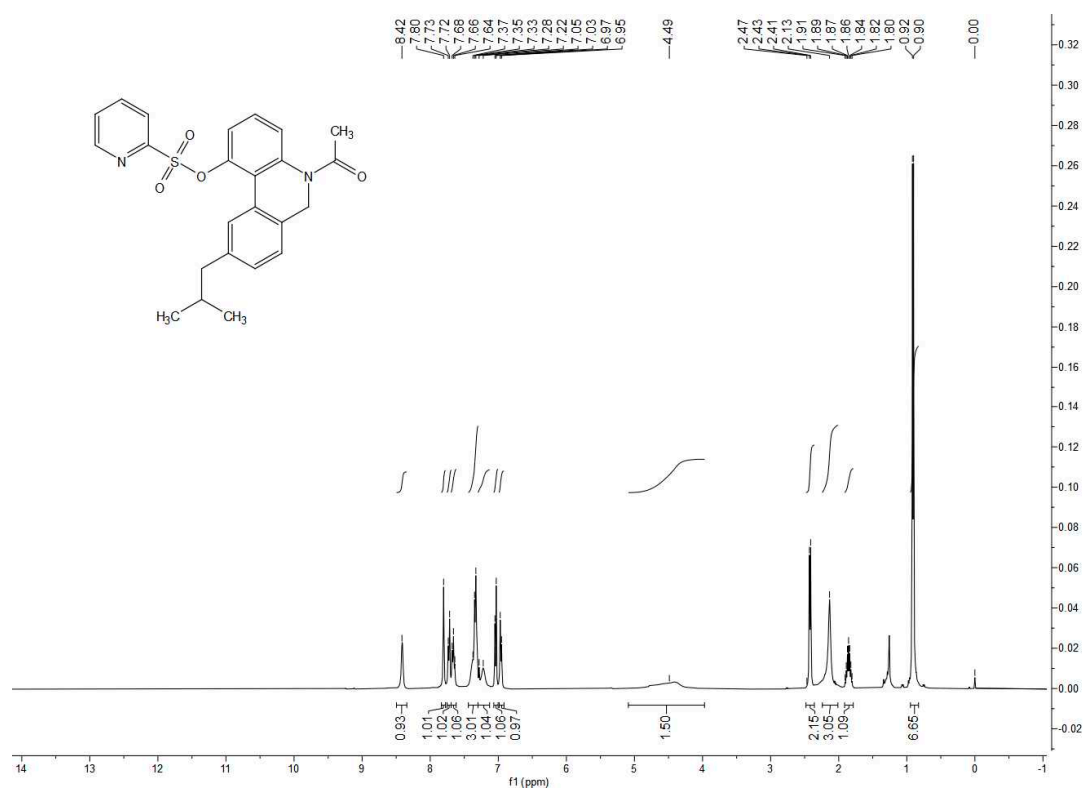

<sup>13</sup>C NMR spectra of compound **2f**

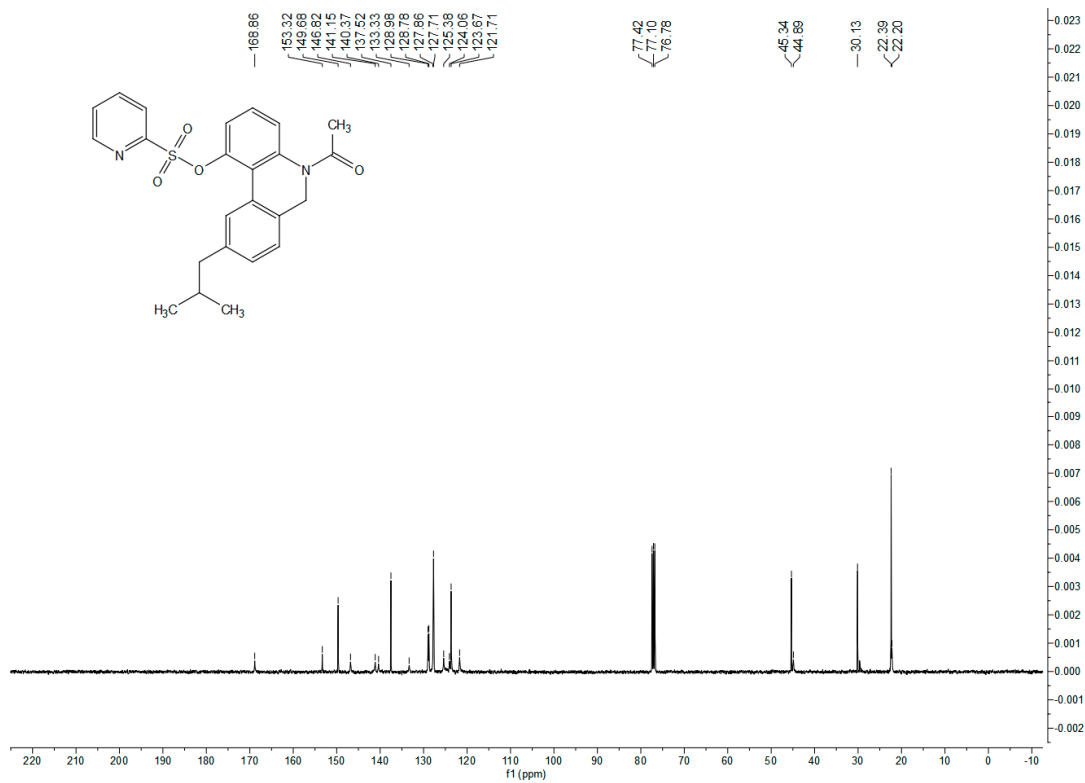

<sup>1</sup>H NMR spectra of compound **2g**

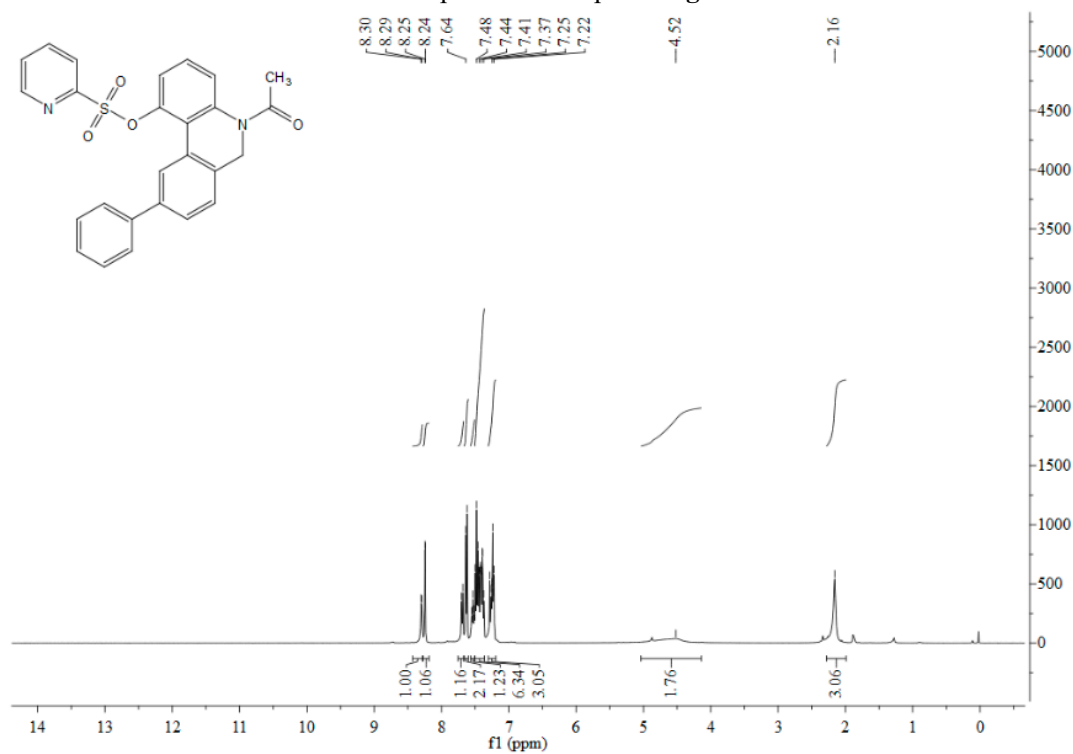

<sup>13</sup>C NMR spectra of compound **2g**

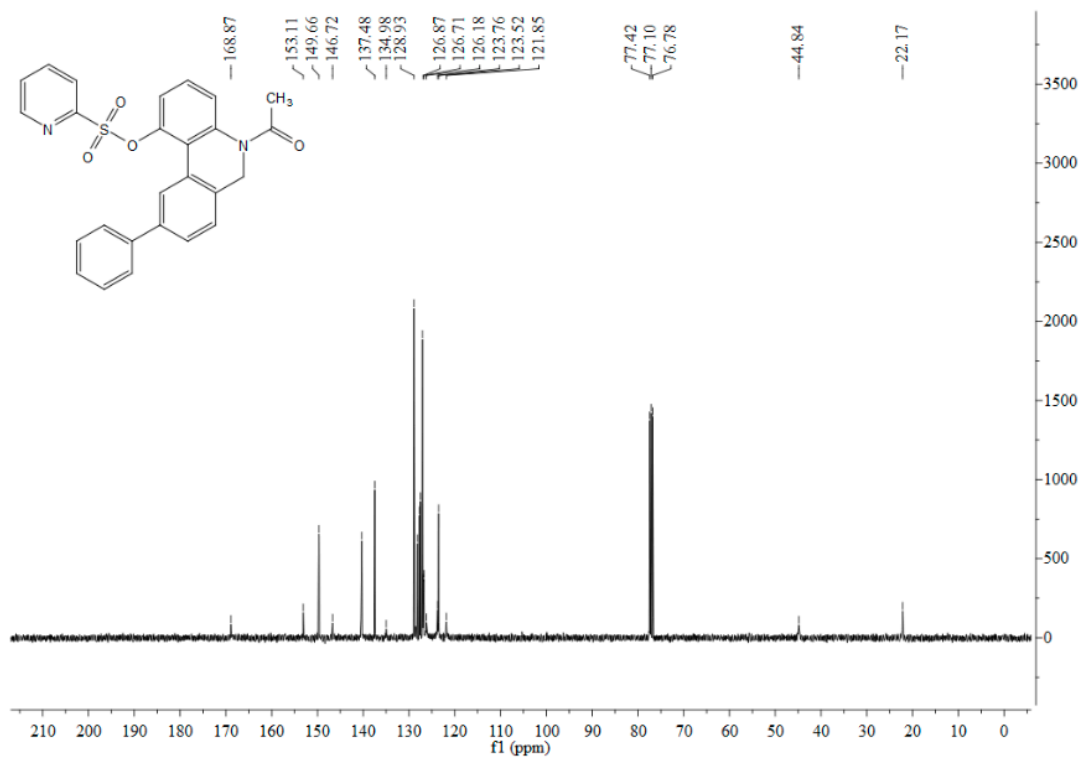



<sup>1</sup>H NMR spectra of compound **2h**

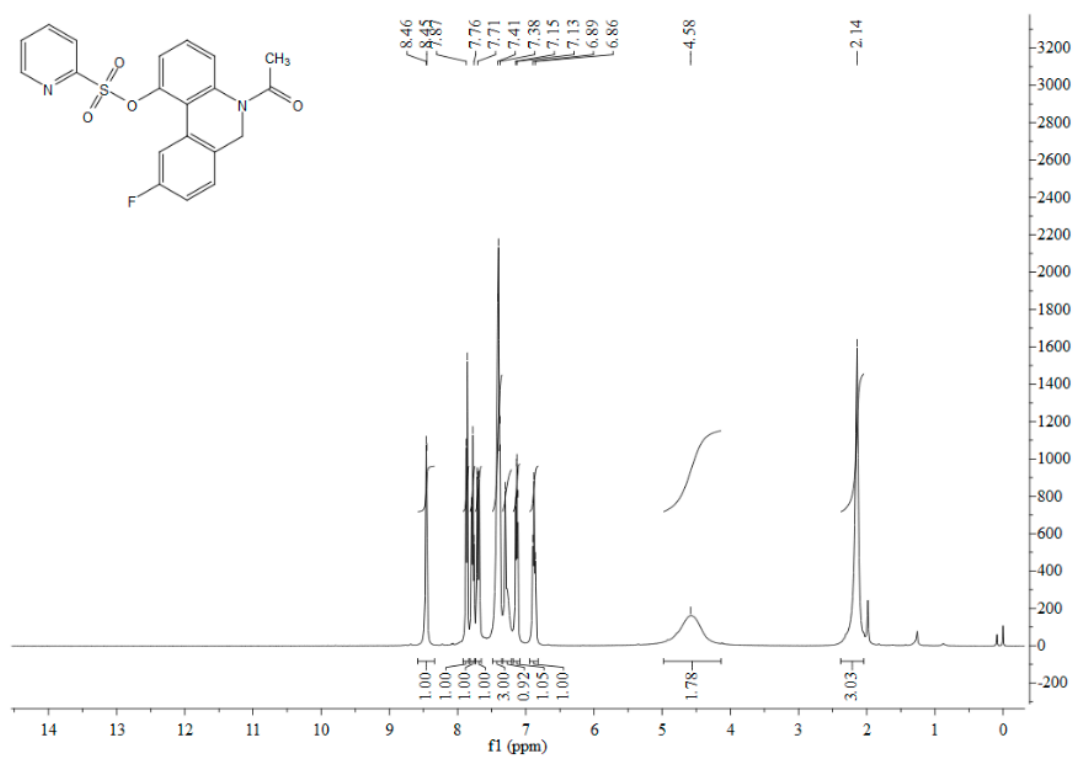

<sup>13</sup>C NMR spectra of compound **2h**

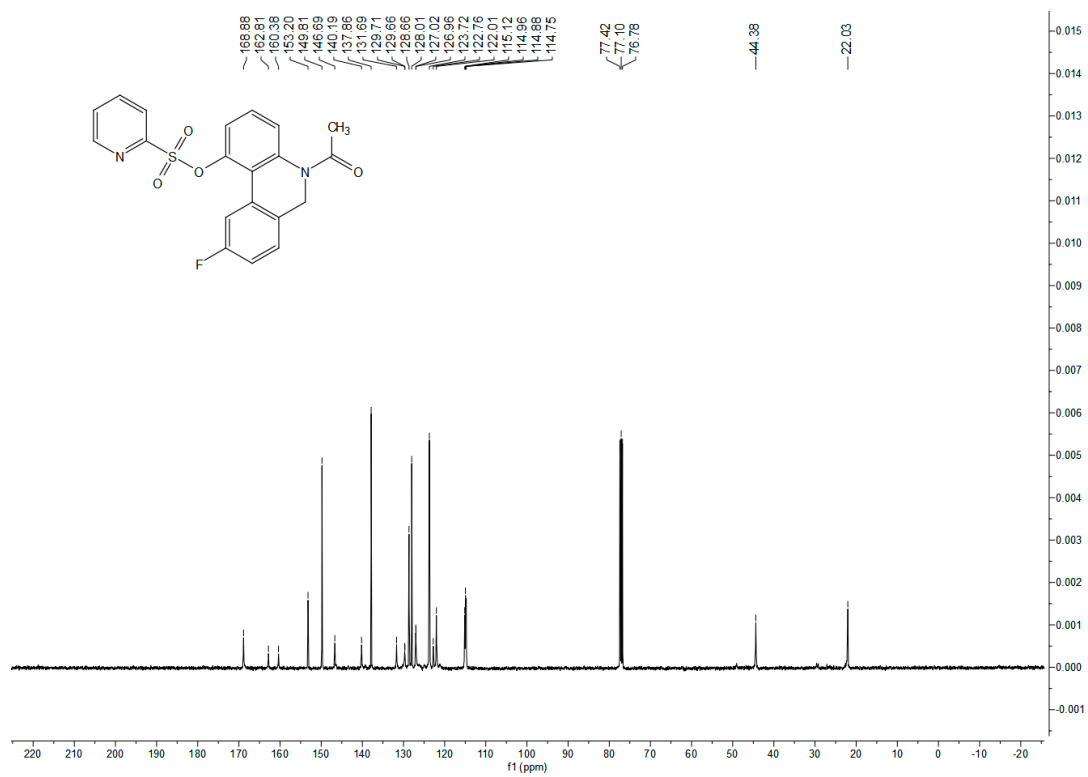

<sup>1</sup>H NMR spectra of compound **2i**

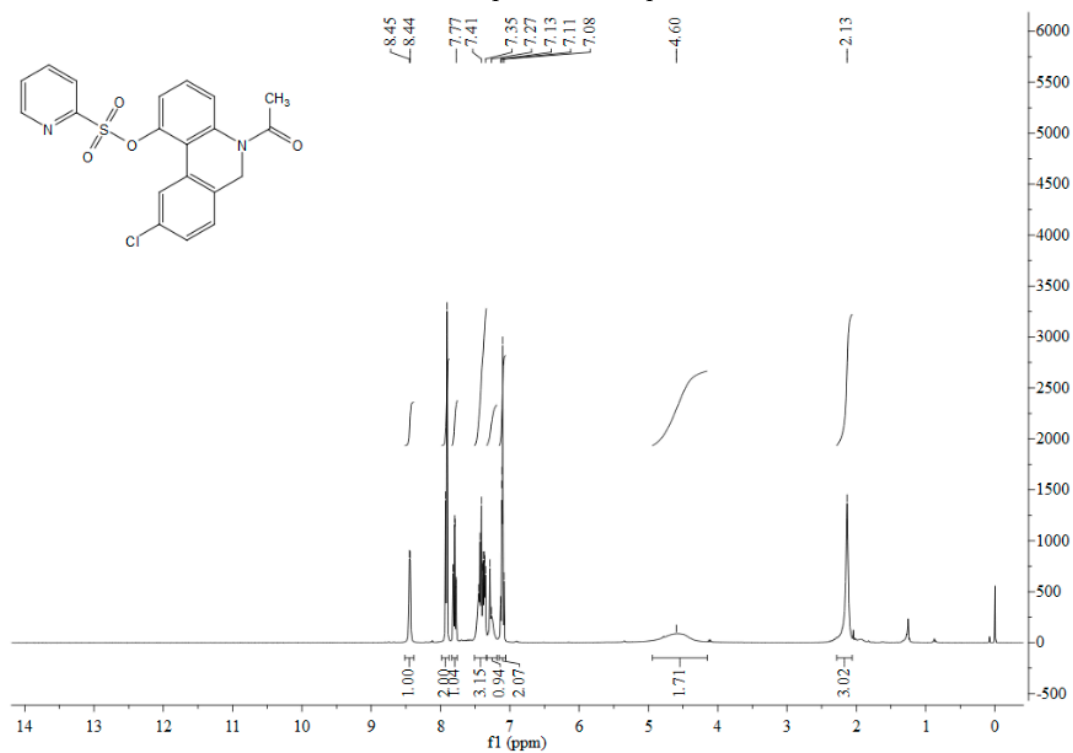

<sup>13</sup>C NMR spectra of compound **2i**

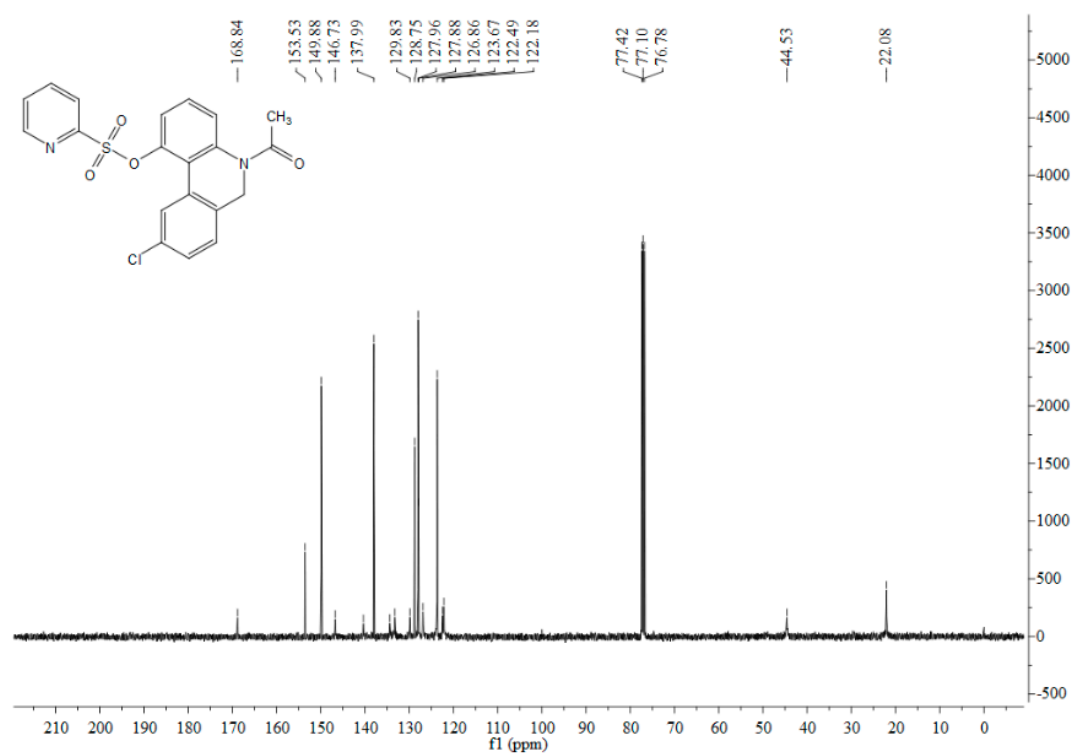

<sup>1</sup>H NMR spectra of compound **2j**

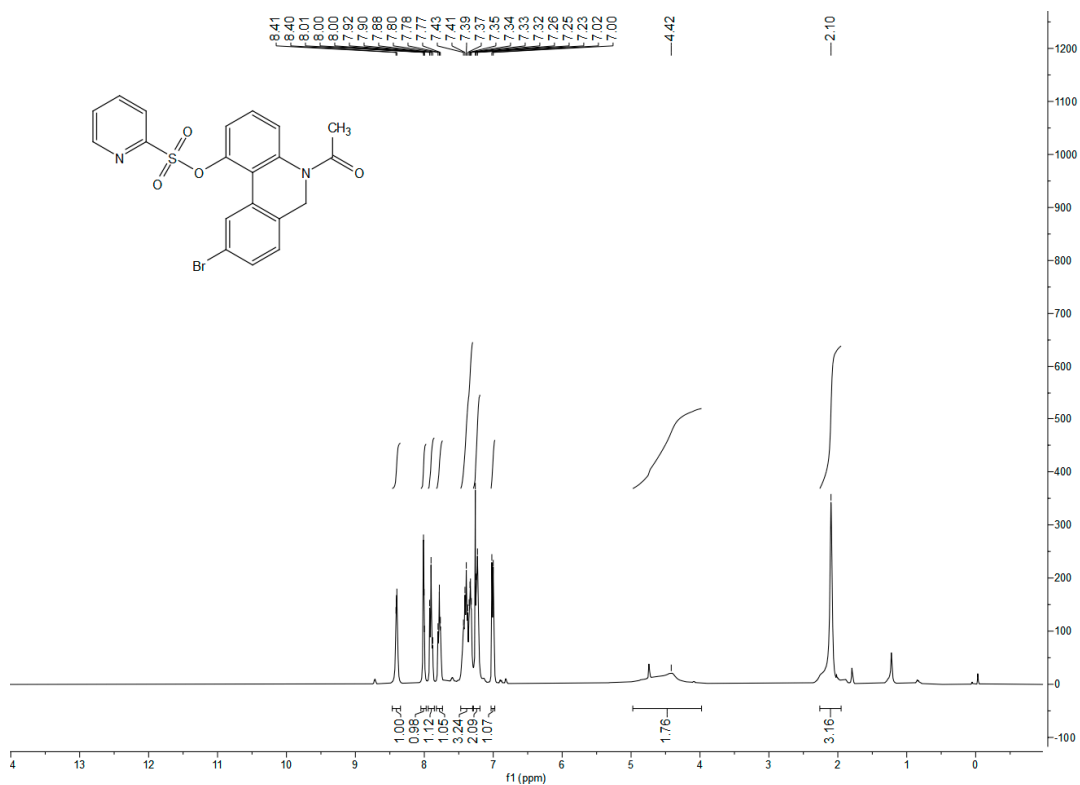

<sup>13</sup>C NMR spectra of compound **2j**

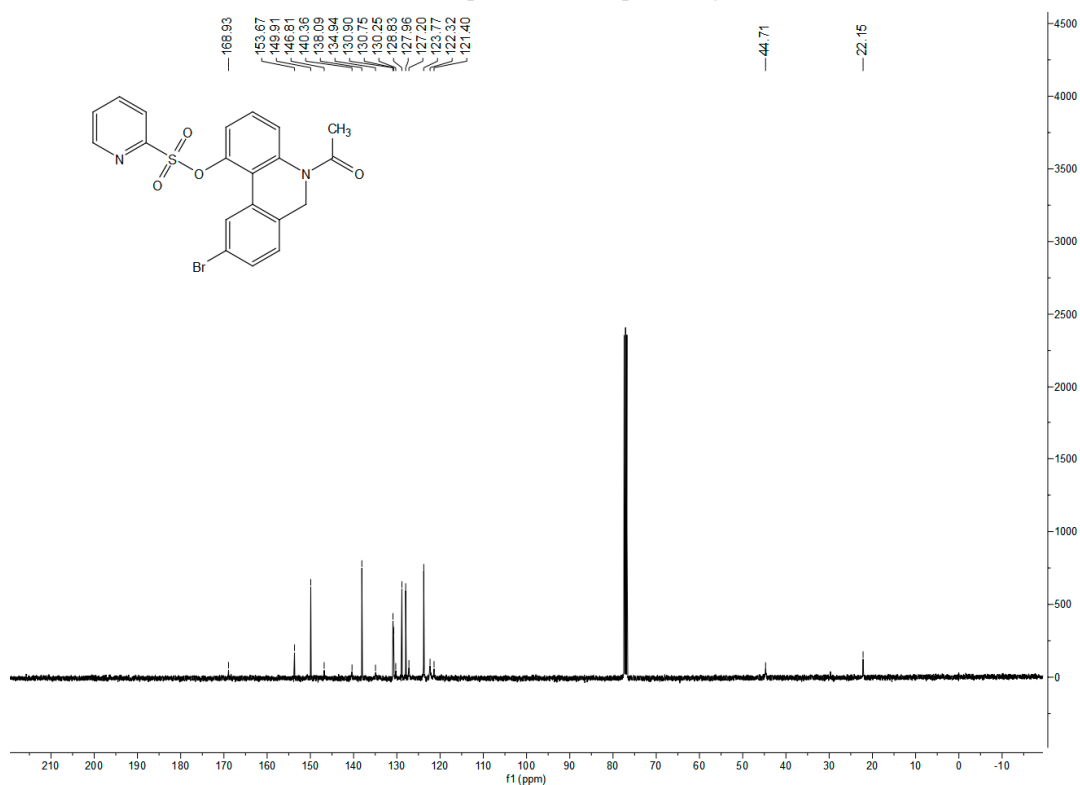

<sup>1</sup>H NMR spectra of compound **2k**

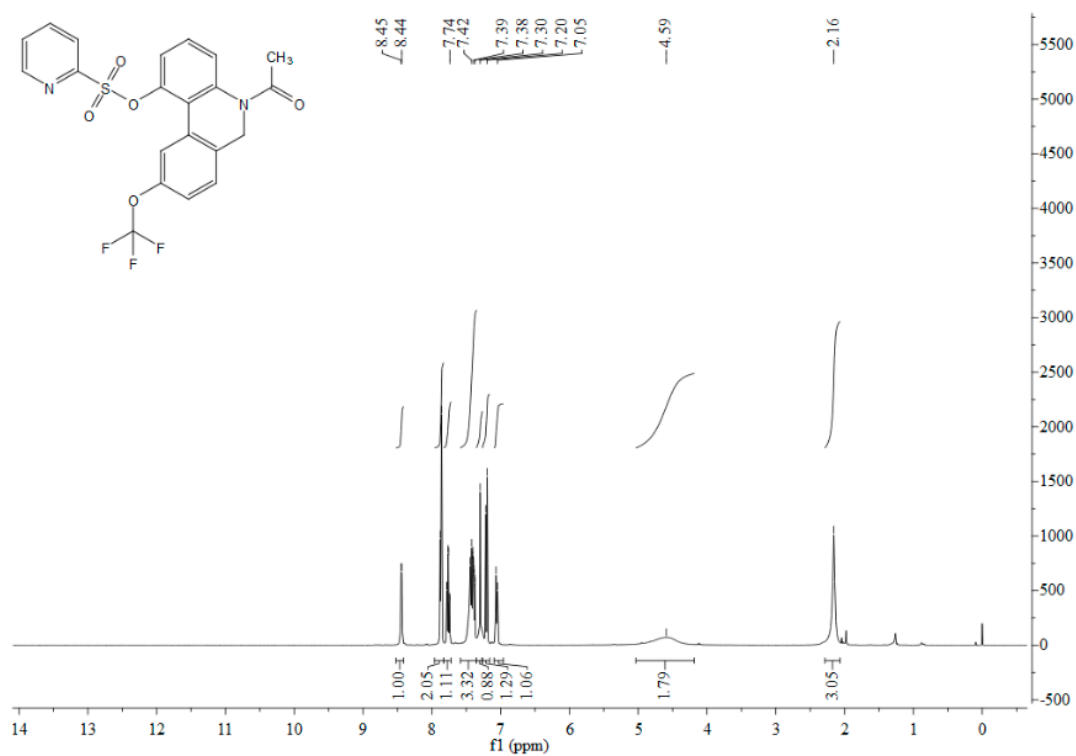

<sup>13</sup>C NMR spectra of compound **2k**

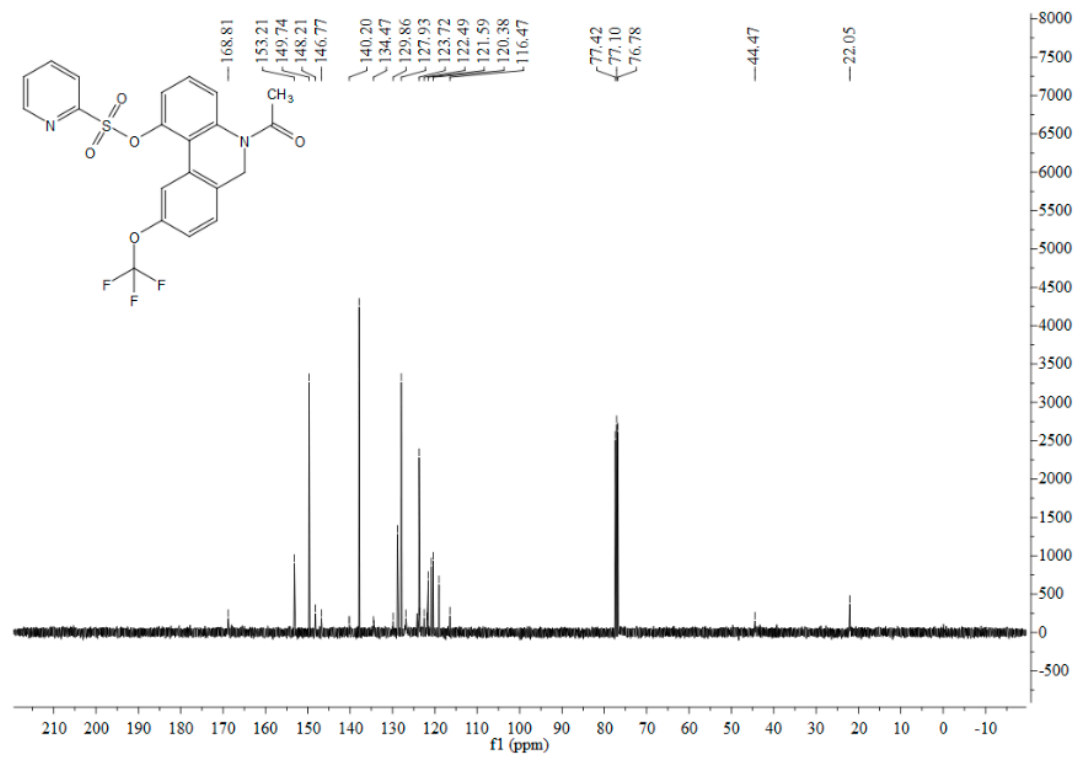

<sup>1</sup>H NMR spectra of compound **2I**

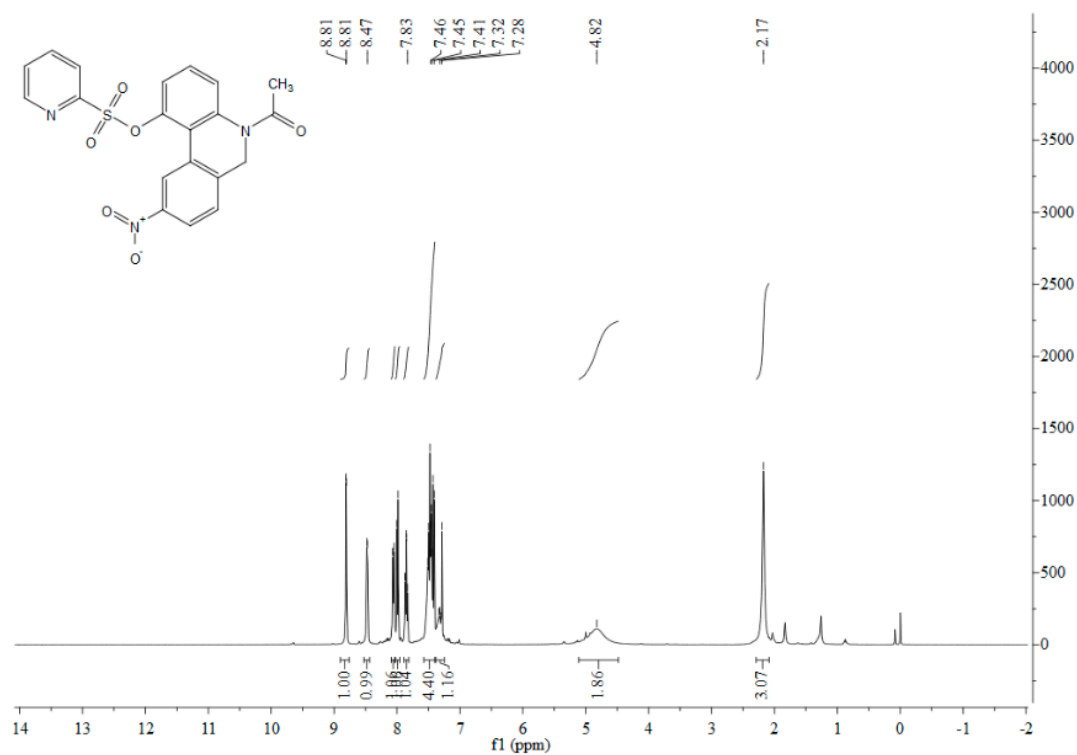

<sup>13</sup>C NMR spectra of compound **2I**

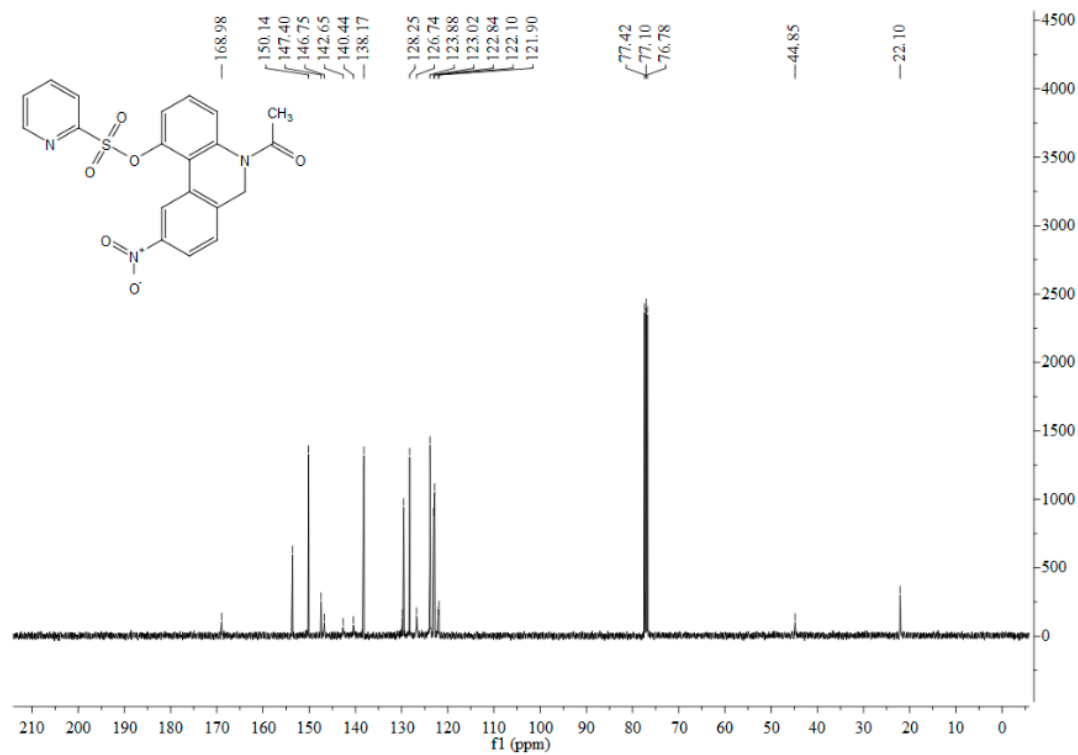

<sup>1</sup>H NMR spectra of compound **2m**

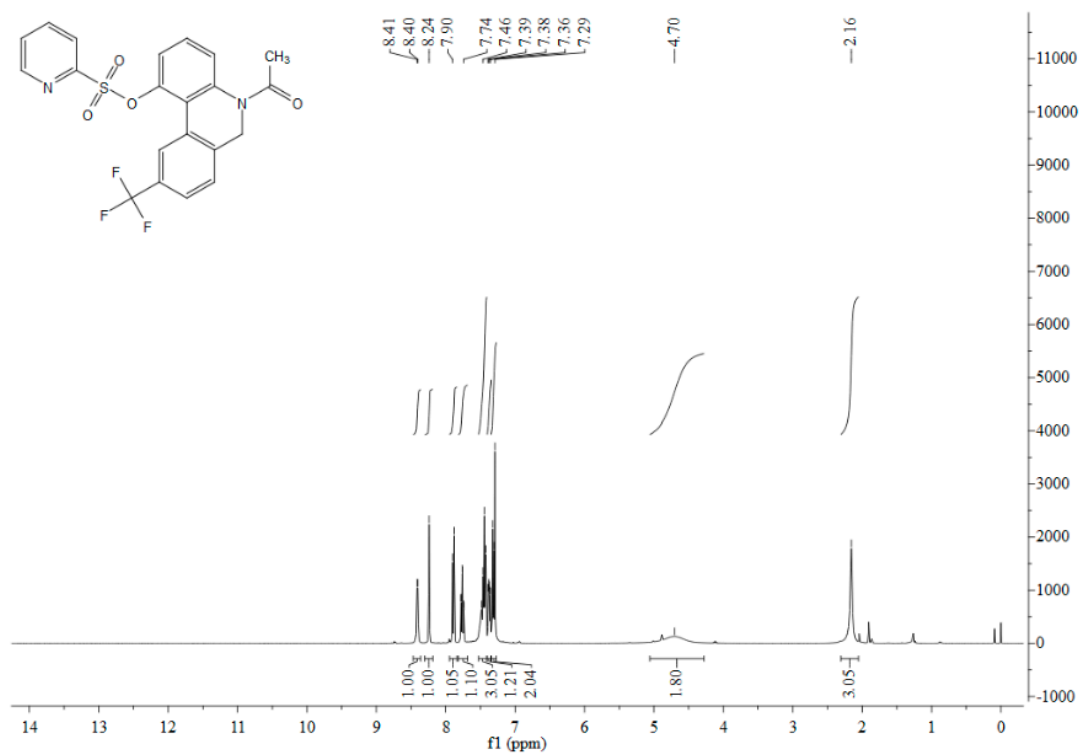

<sup>13</sup>C NMR spectra of compound **2m**

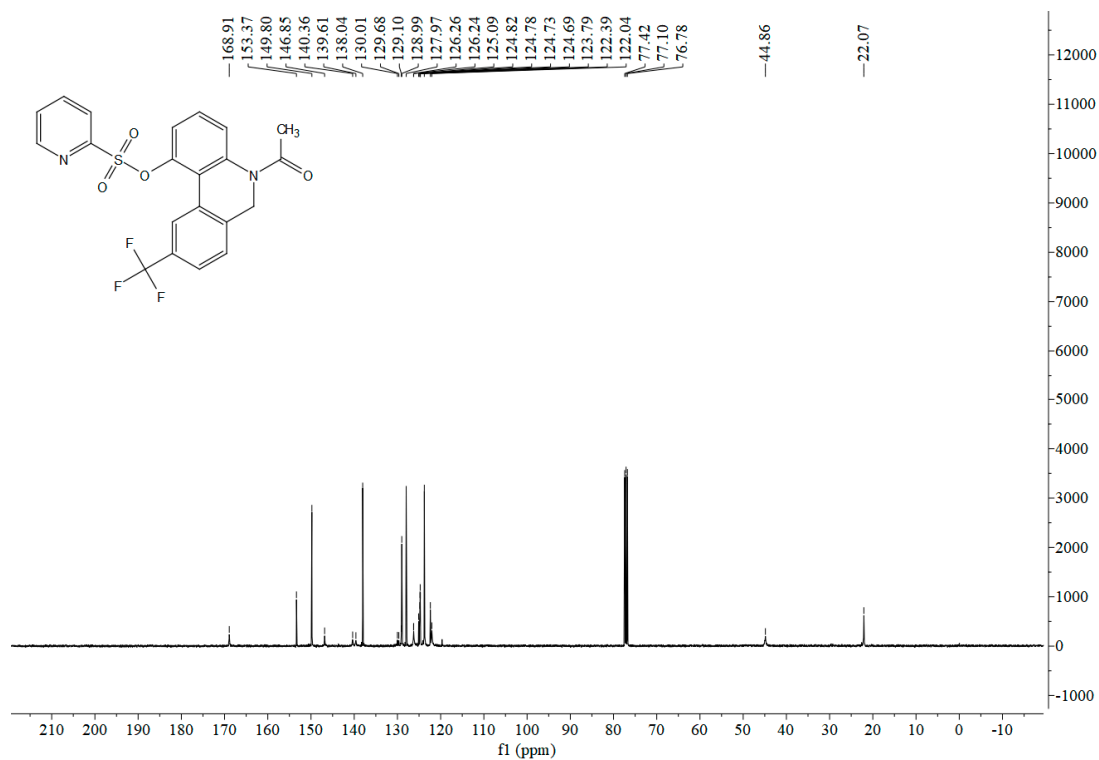

<sup>1</sup>H NMR spectra of compound **2n**

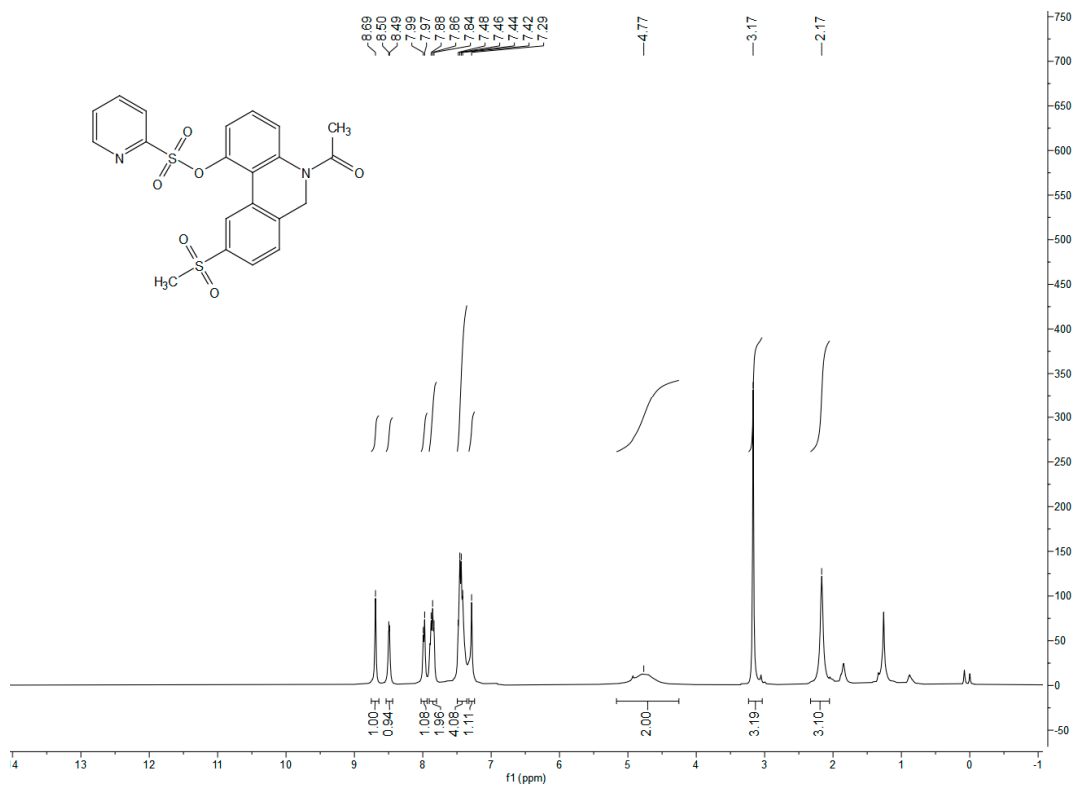

<sup>13</sup>C NMR spectra of compound **2n**

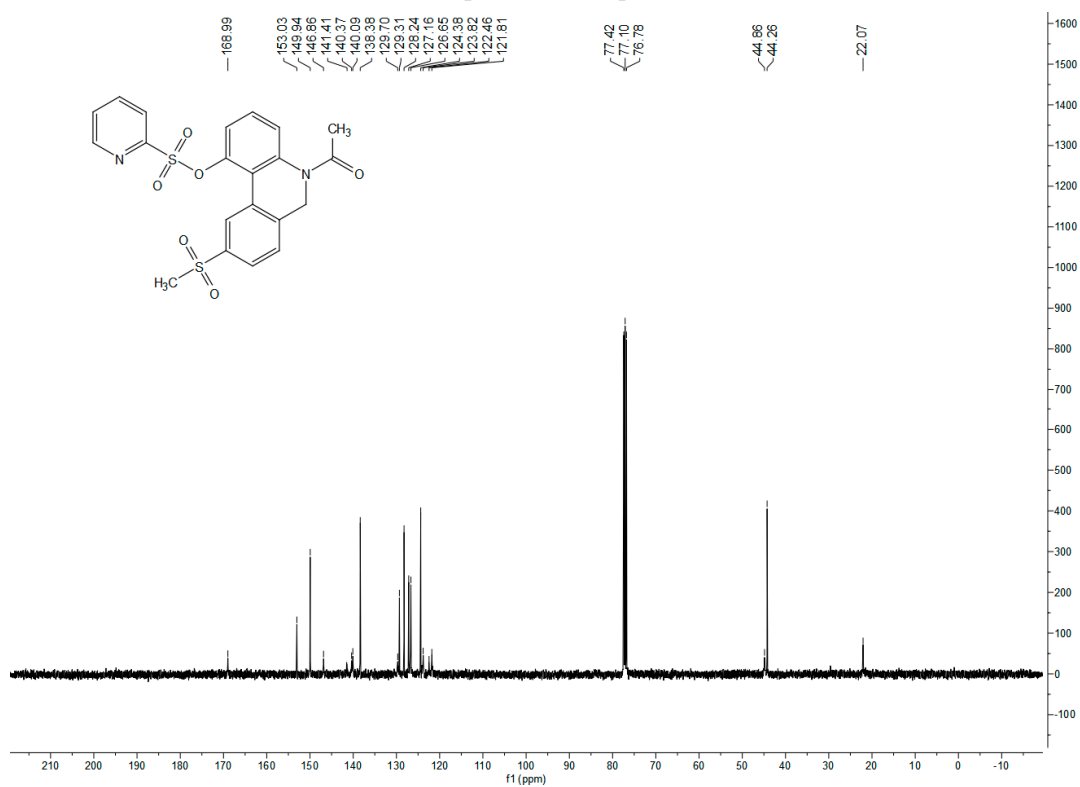

<sup>1</sup>H NMR spectra of compound **2o**

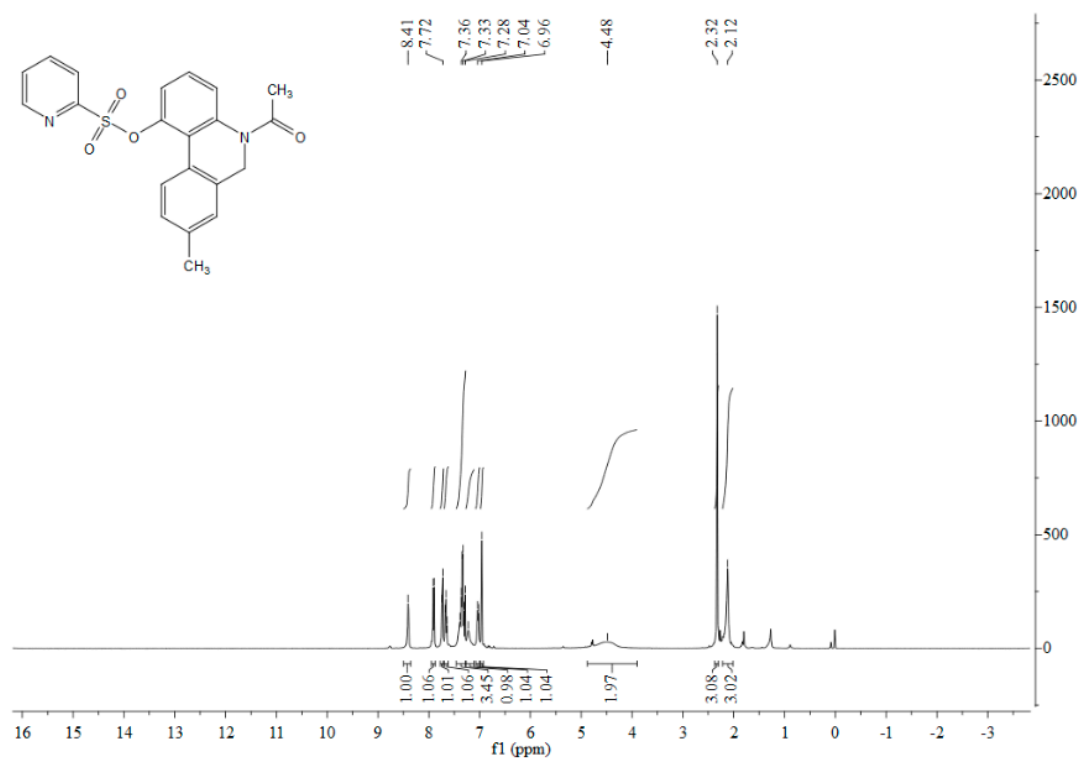

<sup>13</sup>C NMR spectra of compound **2o**

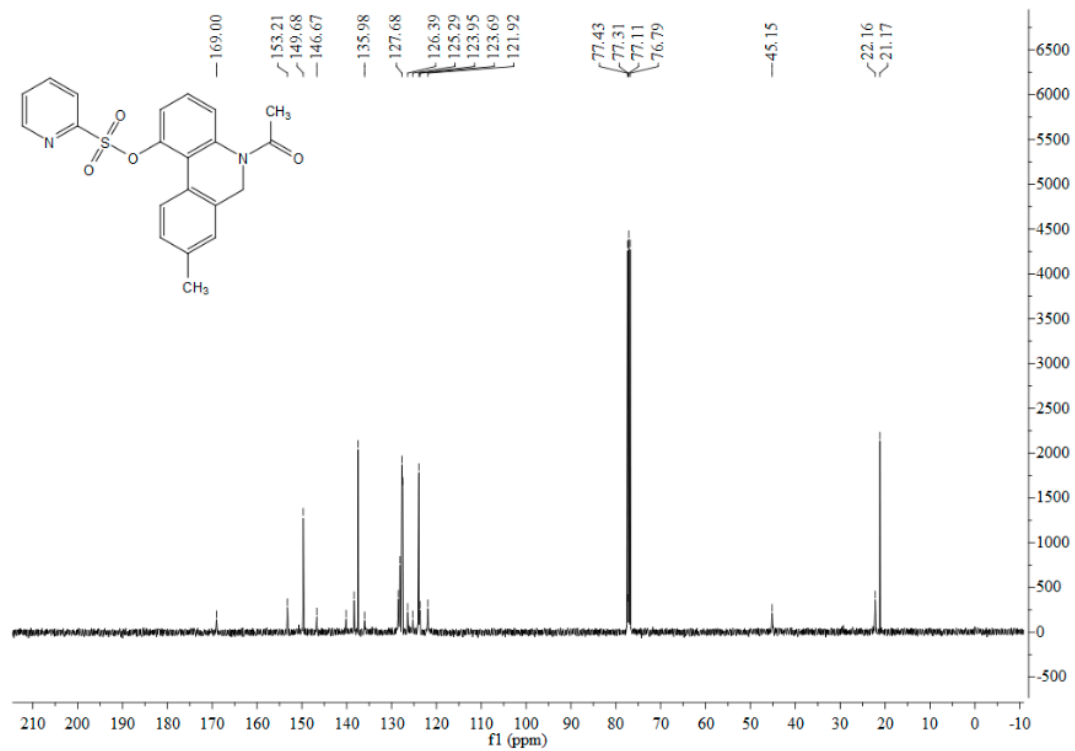



<sup>1</sup>H NMR spectra of compound **2p**

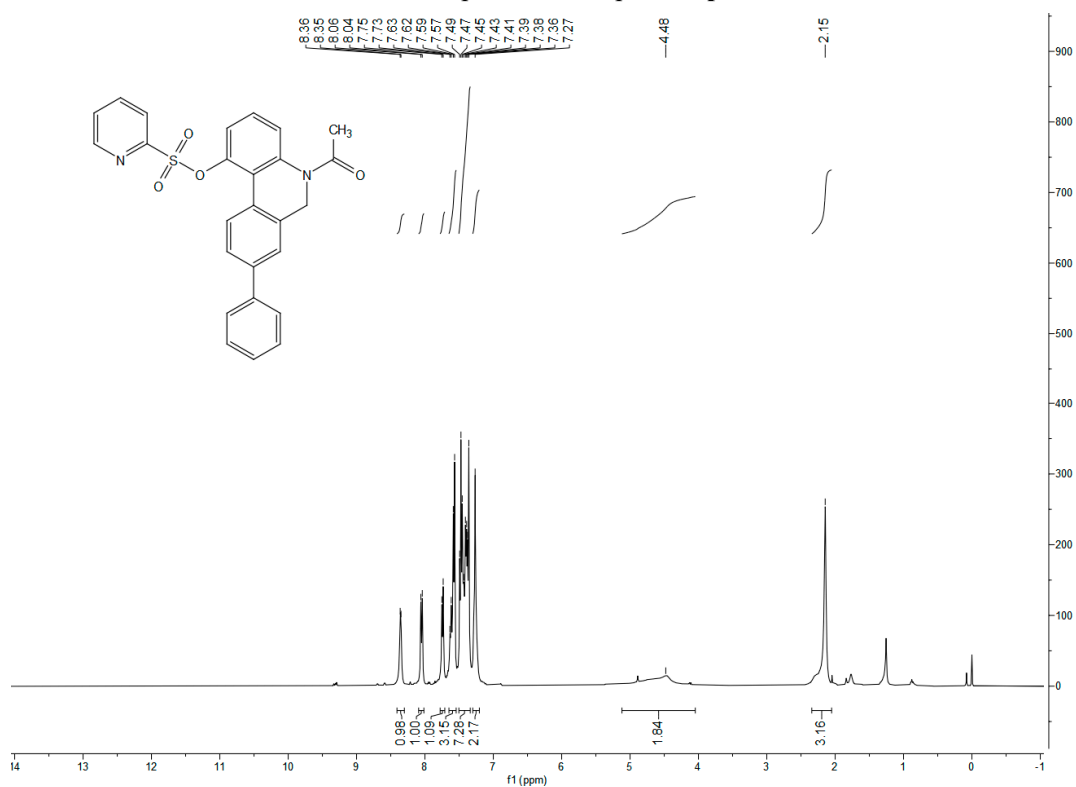

<sup>13</sup>C NMR spectra of compound **2p**

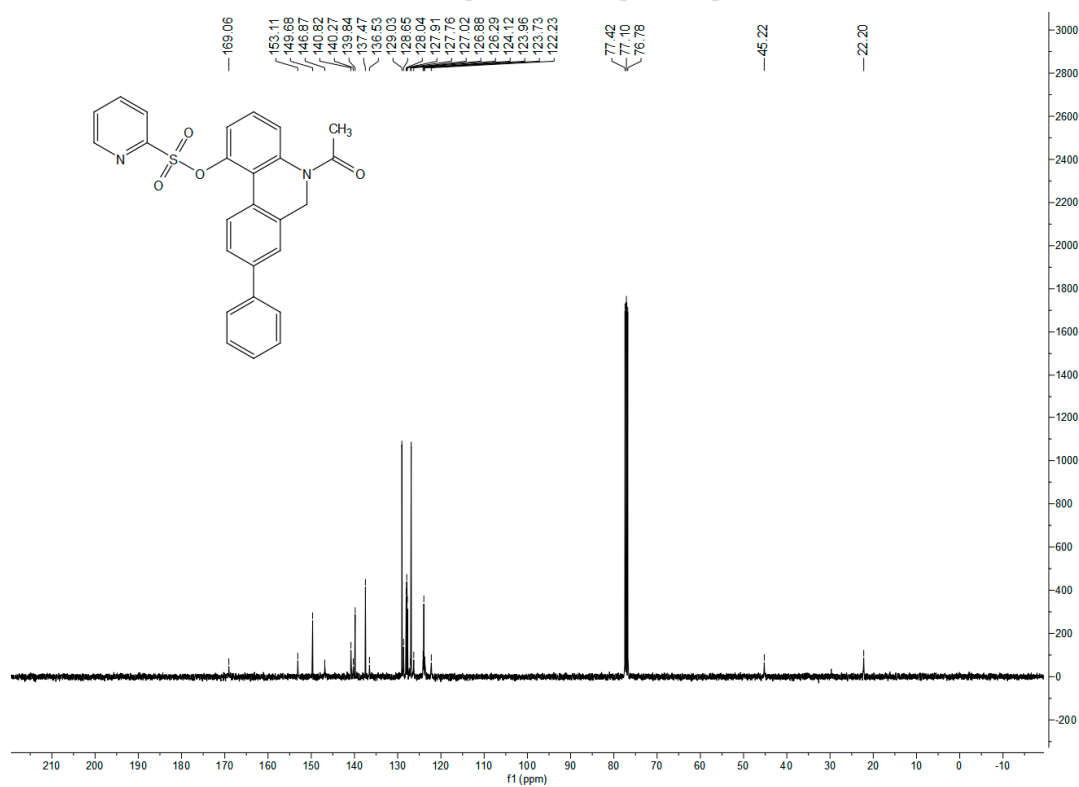

<sup>1</sup>H NMR spectra of compound **2q**

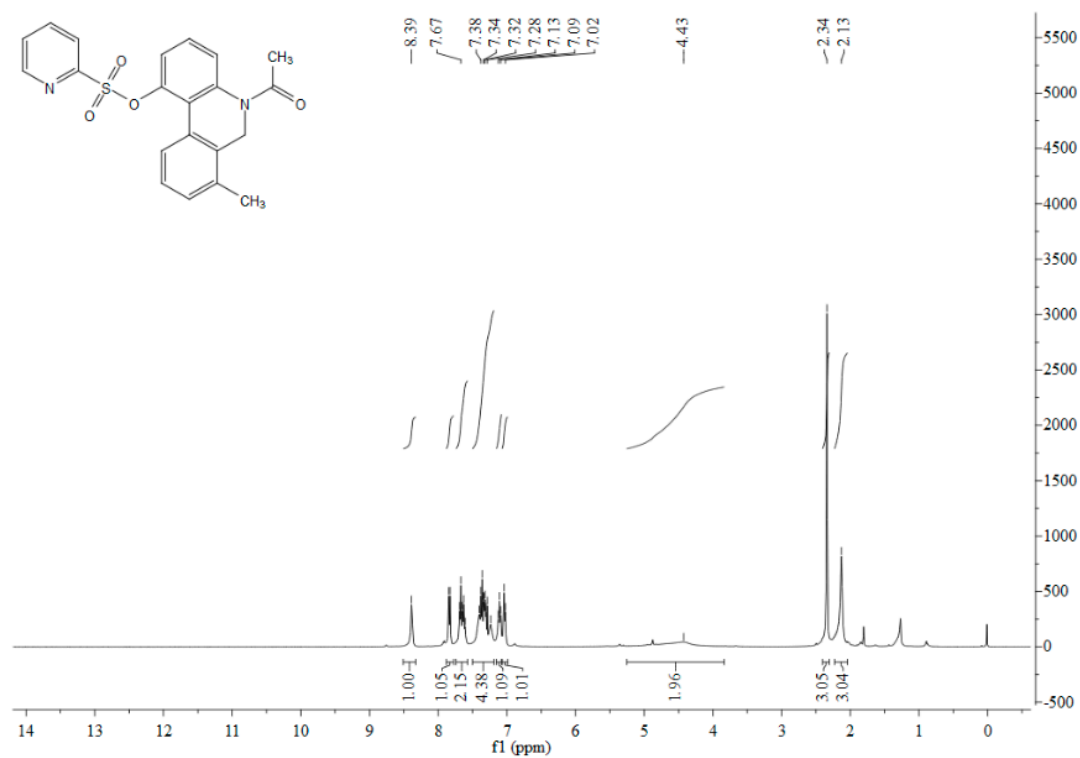

<sup>13</sup>C NMR spectra of compound **2q**

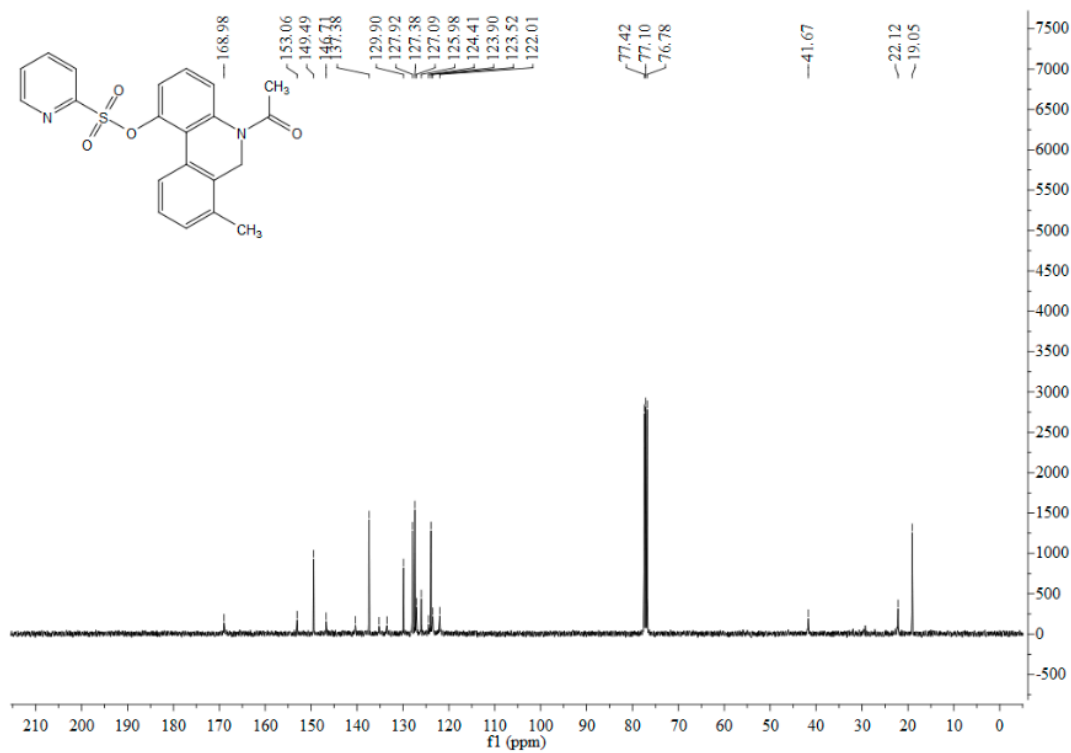

# <sup>1</sup>H NMR spectra of compound 2r

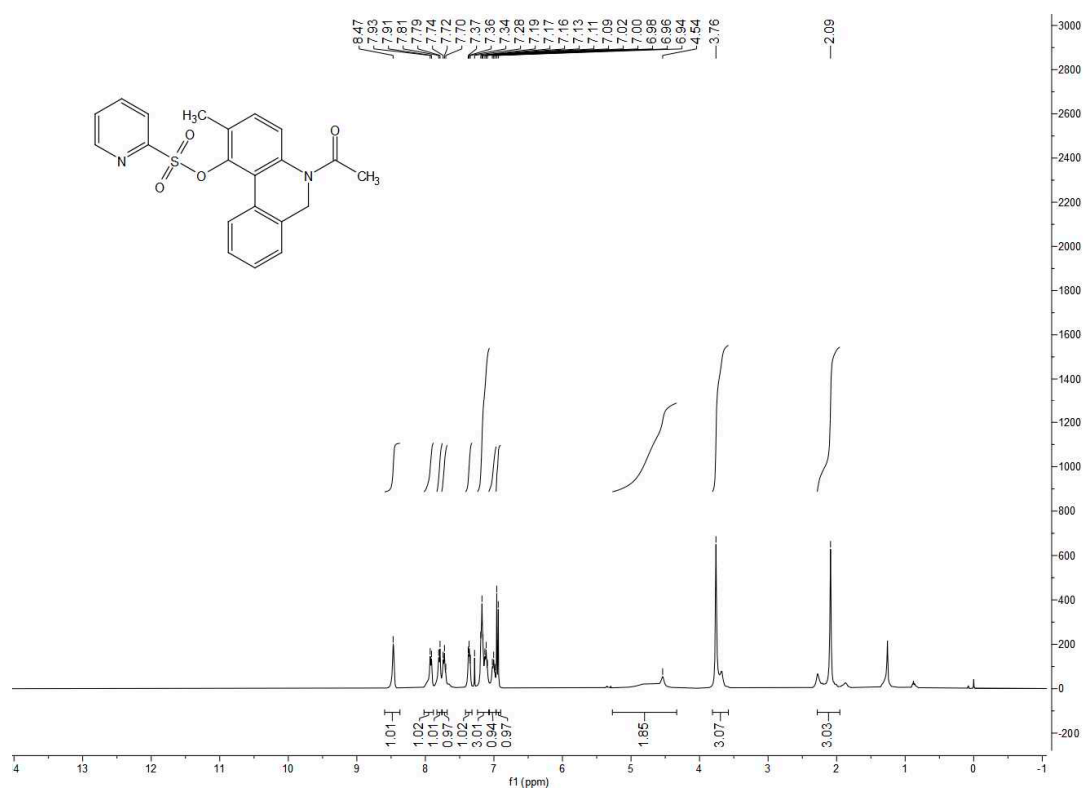

# <sup>13</sup>C NMR spectra of compound 2r

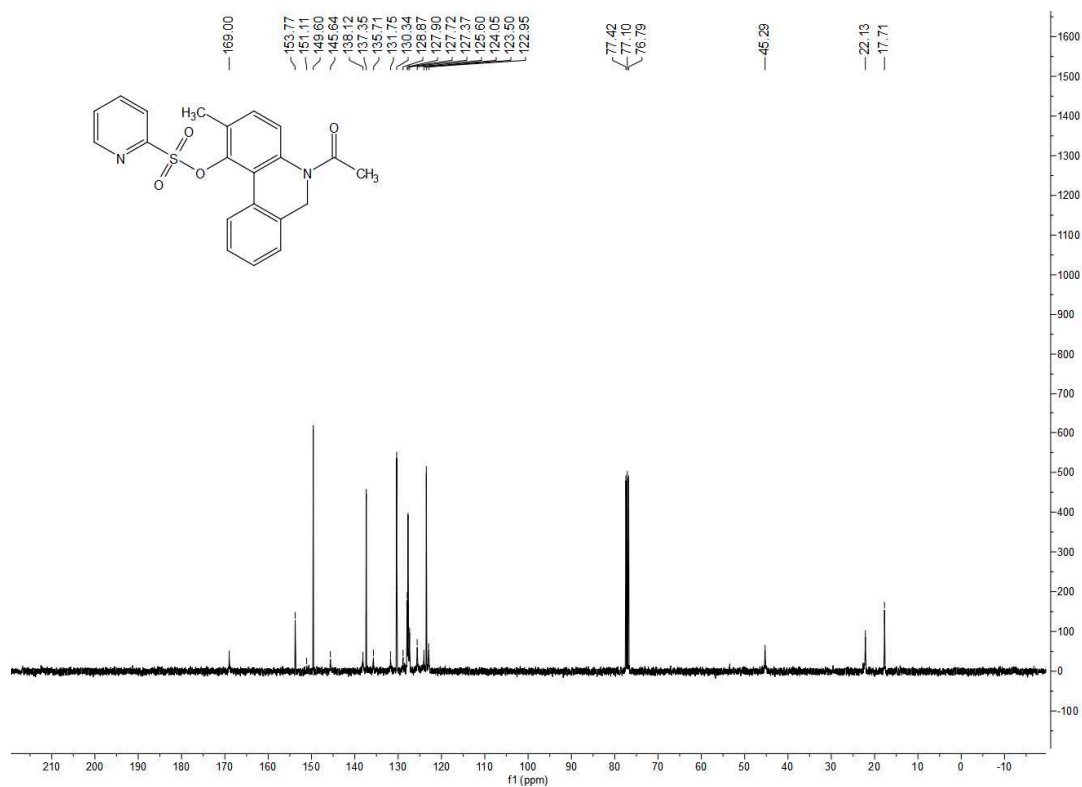

<sup>1</sup>H NMR spectra of compound 2s

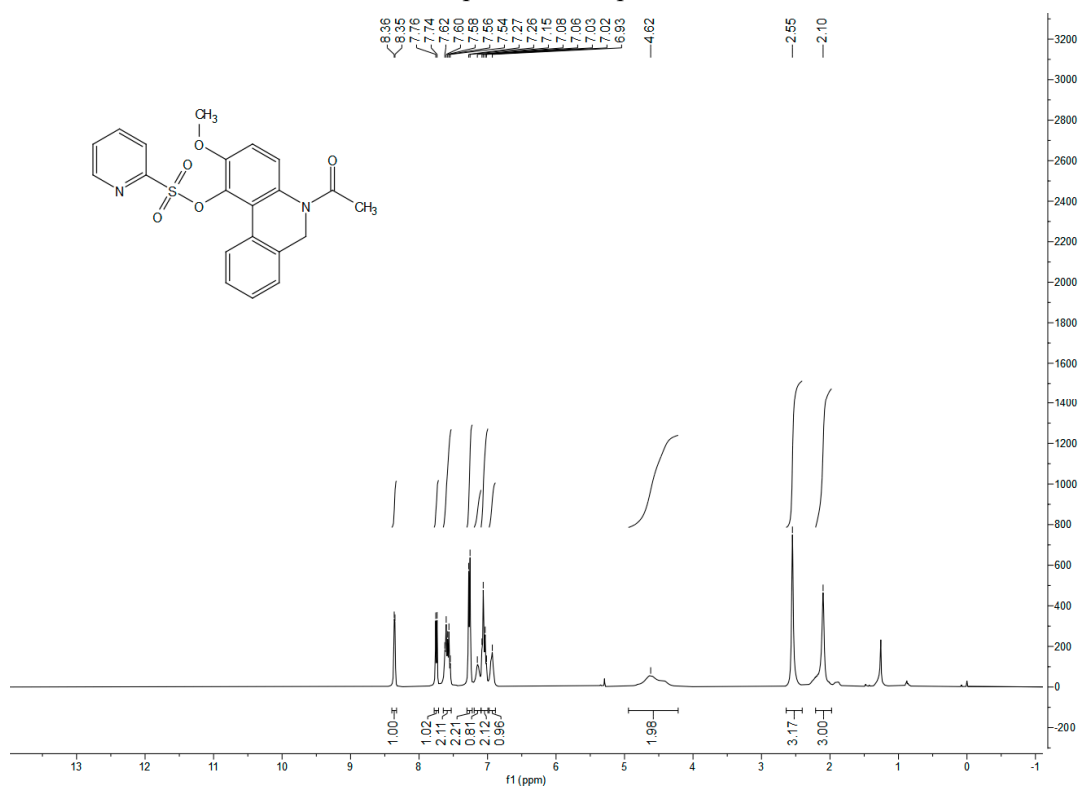

<sup>13</sup>C NMR spectra of compound 2s

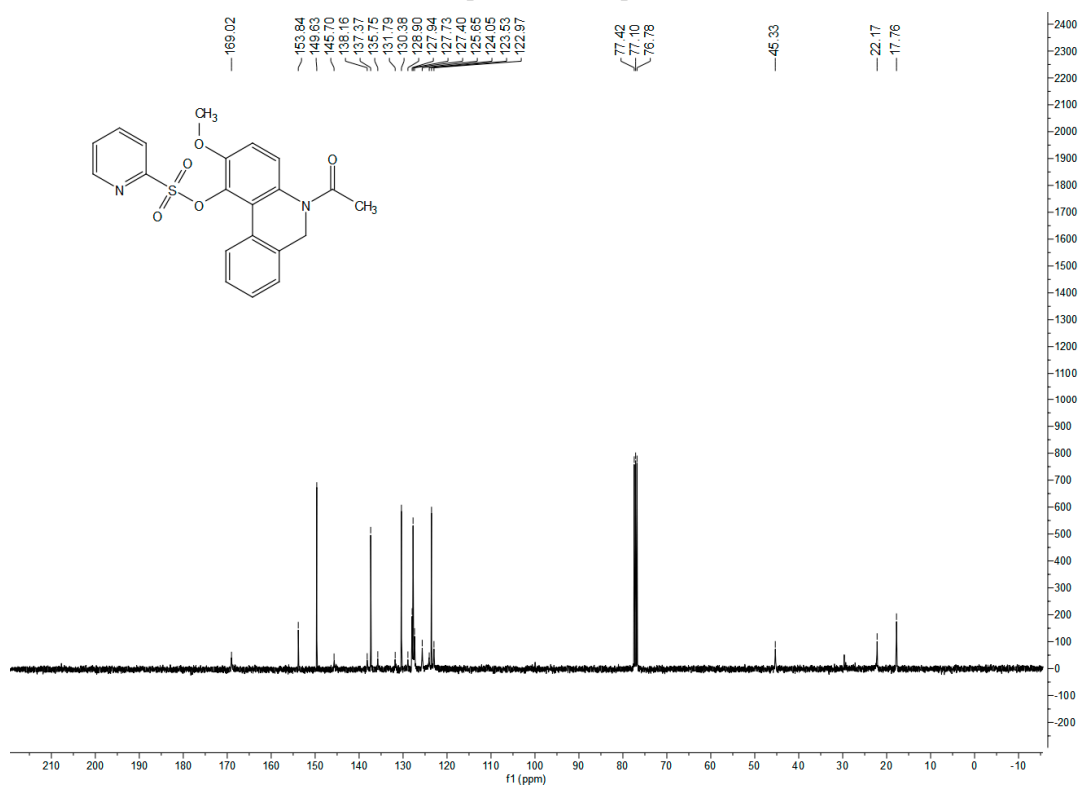

<sup>1</sup>H NMR spectra of compound 2t

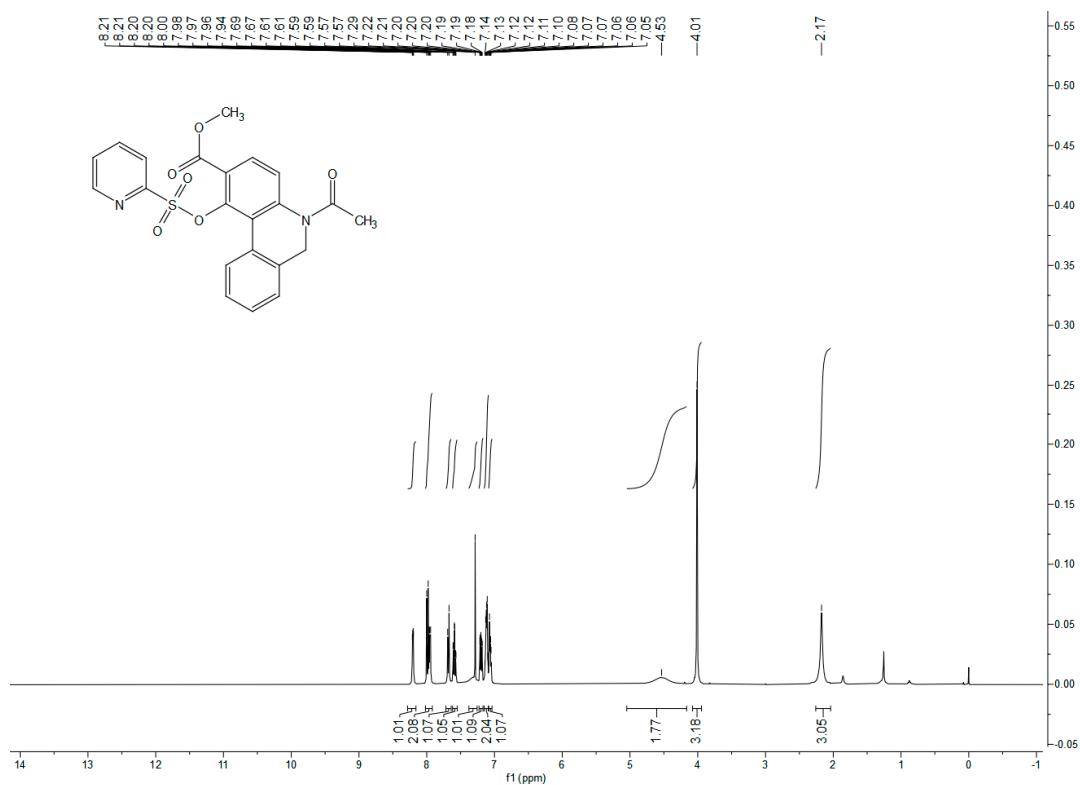

<sup>13</sup>C NMR spectra of compound 2t

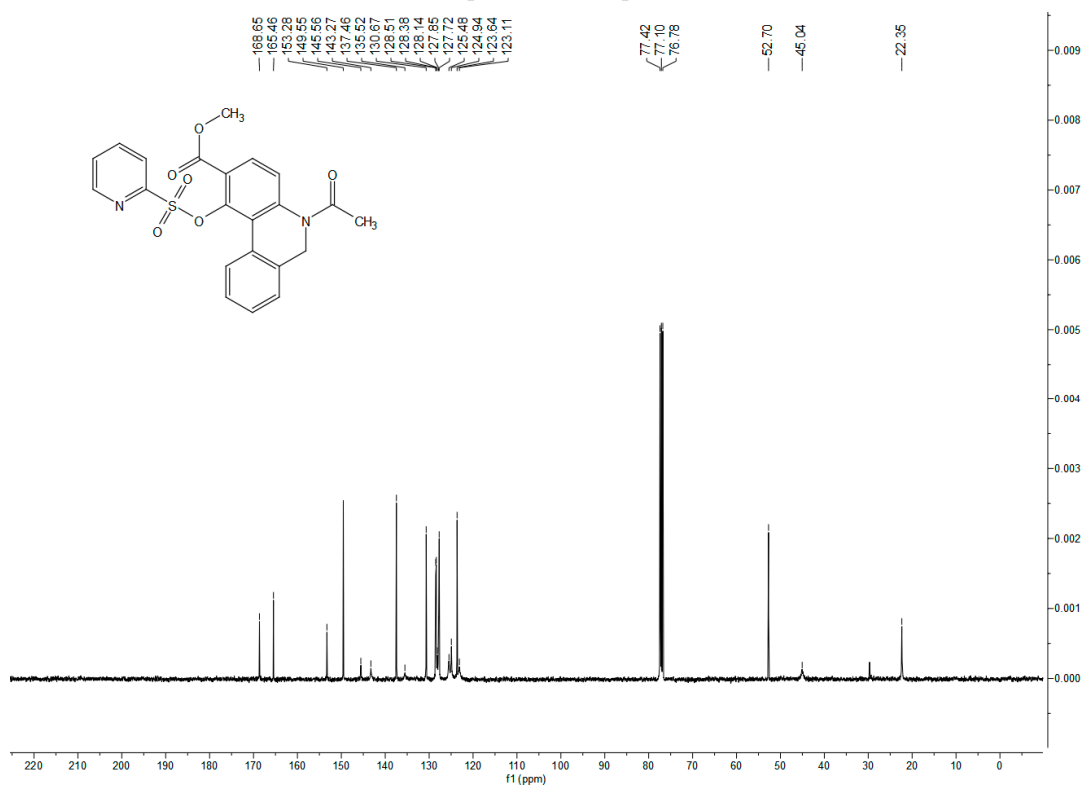

6. Spectral copies of **3-7**  $^1\text{H}$  NMR and  $^{13}\text{C}$  NMR

$^1\text{H}$  NMR spectra of compound **3**

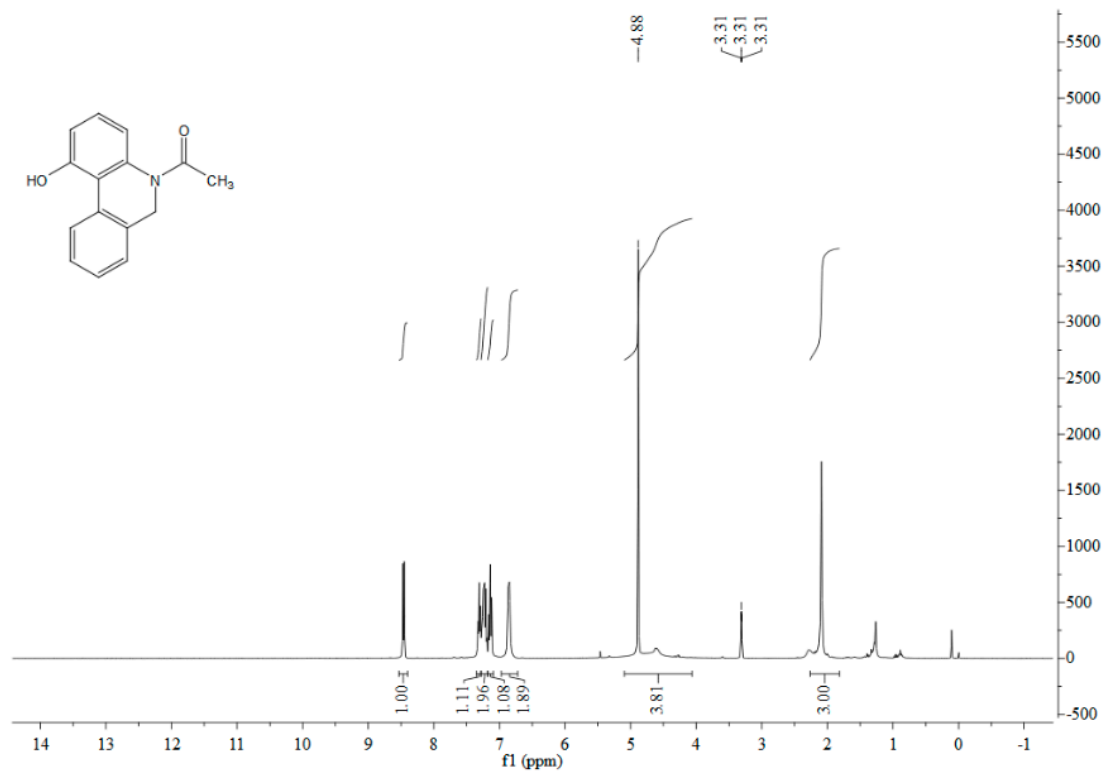

$^{13}\text{C}$  NMR spectra of compound **3**

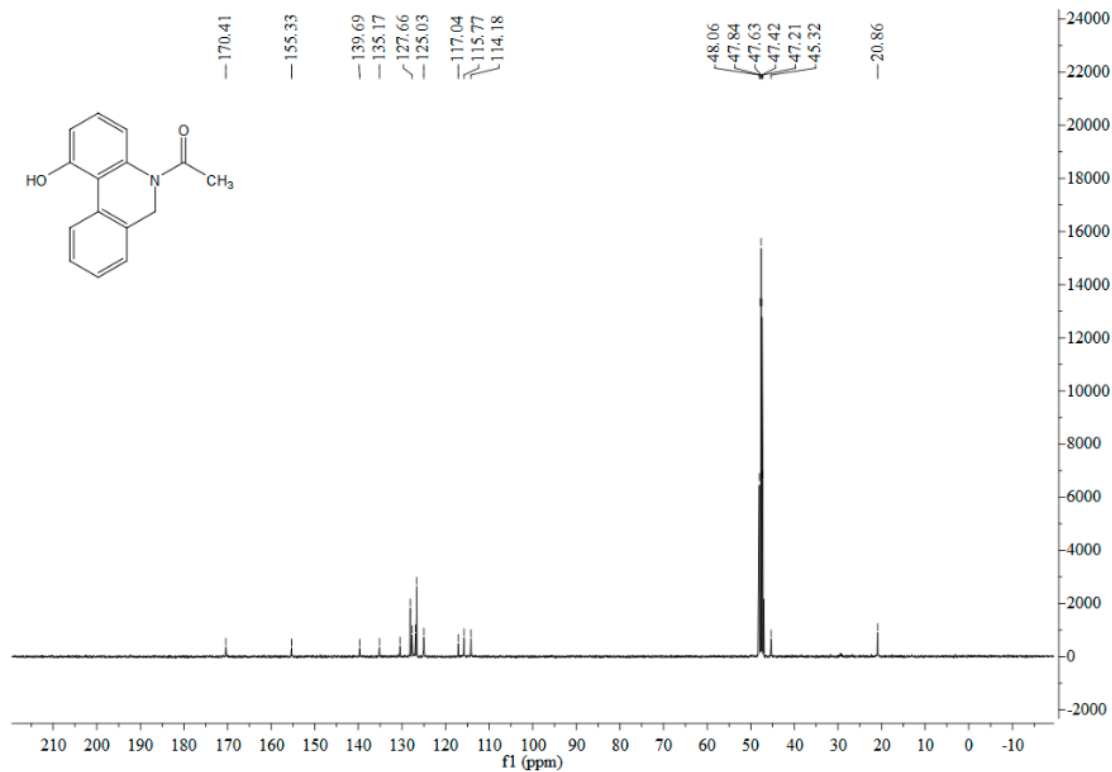

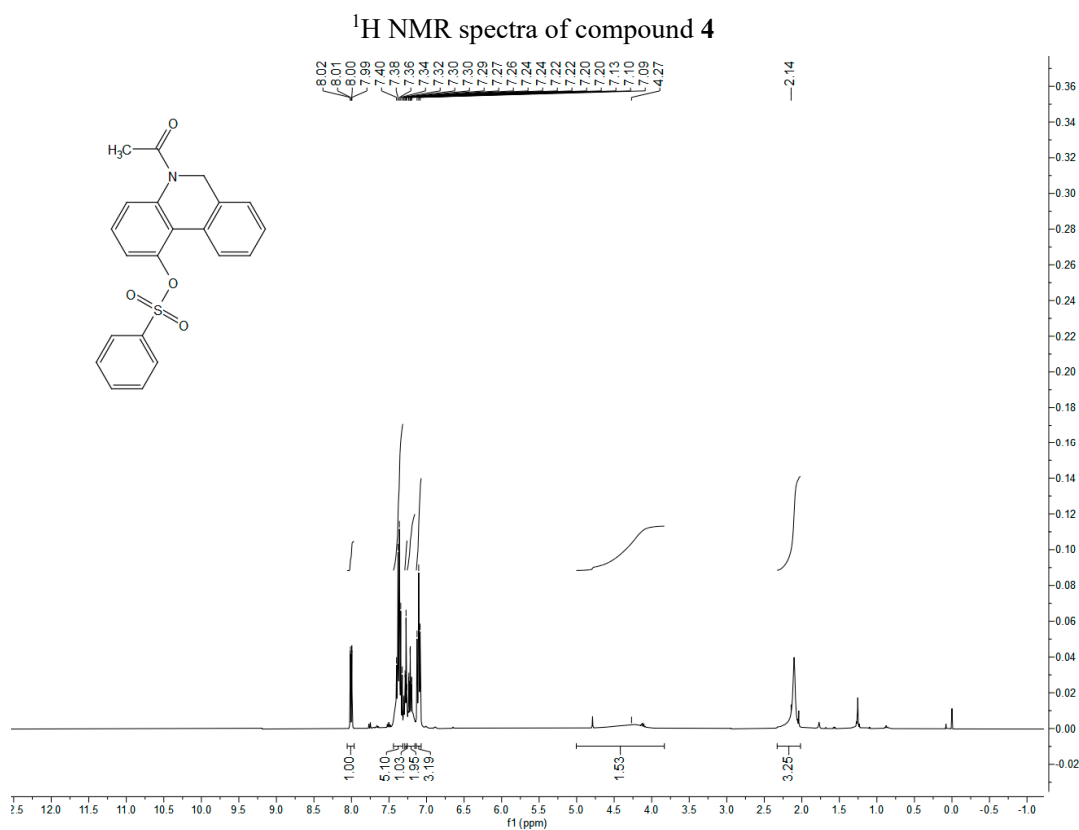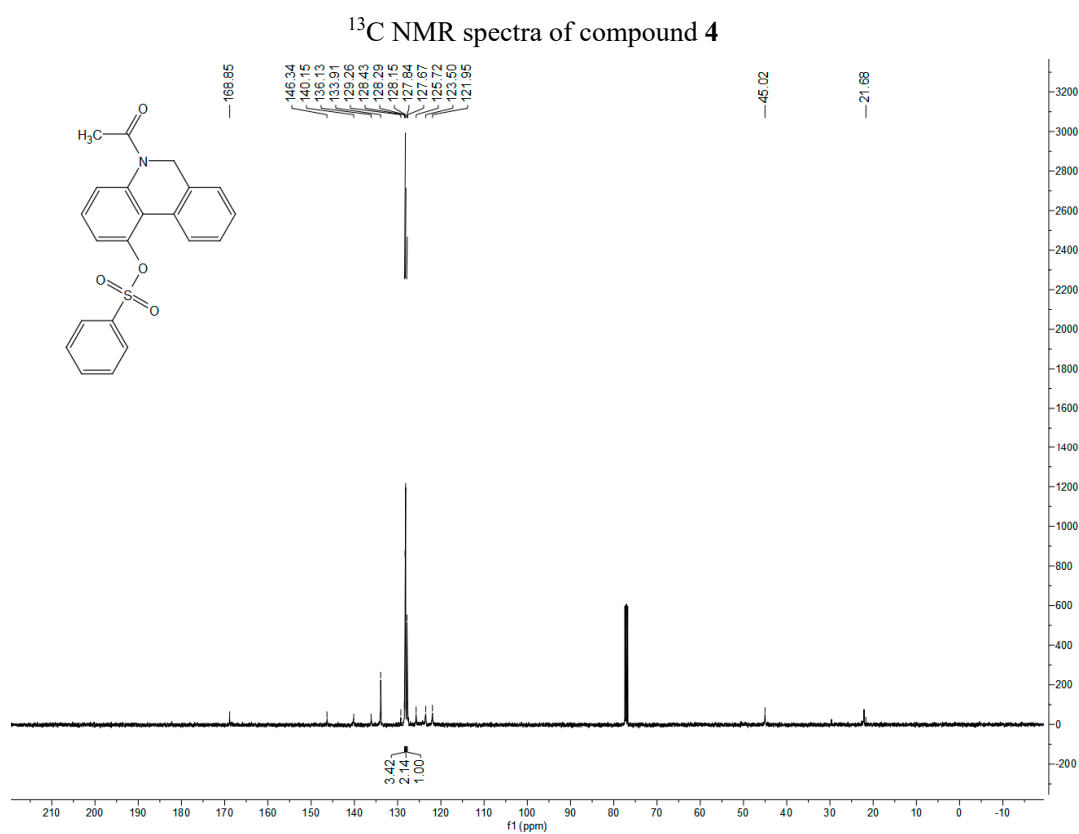

<sup>1</sup>H NMR spectra of compound **5**

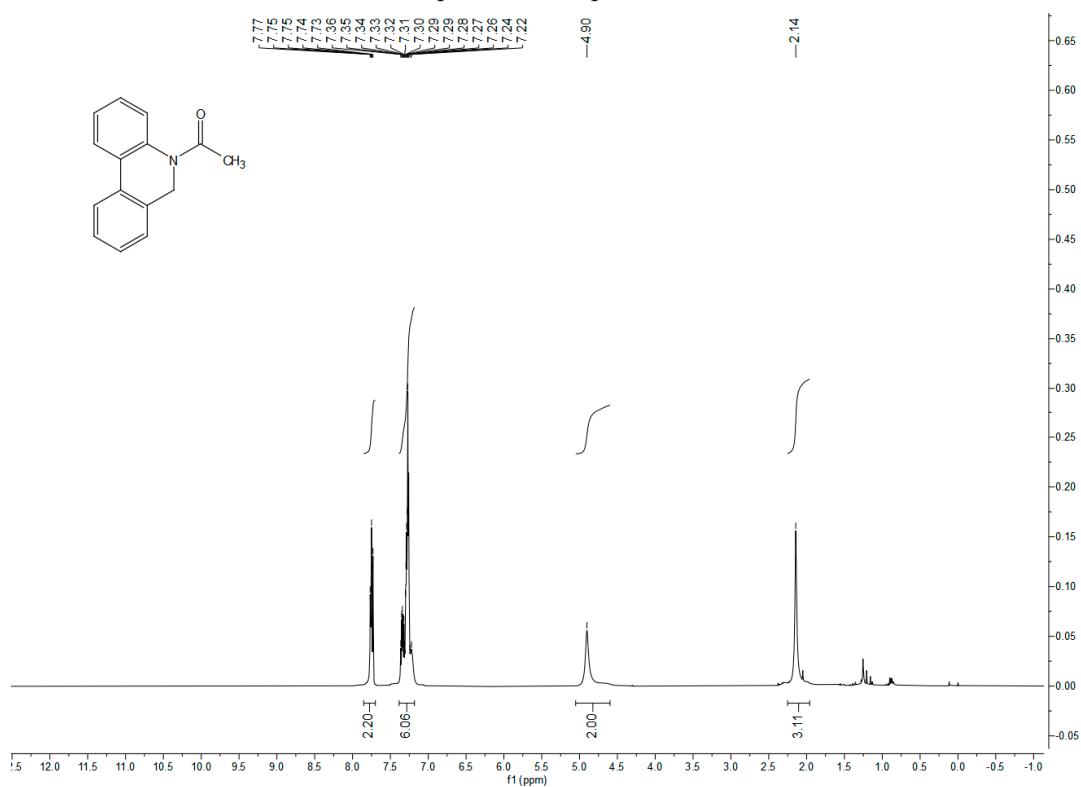

<sup>13</sup>C NMR spectra of compound **5**

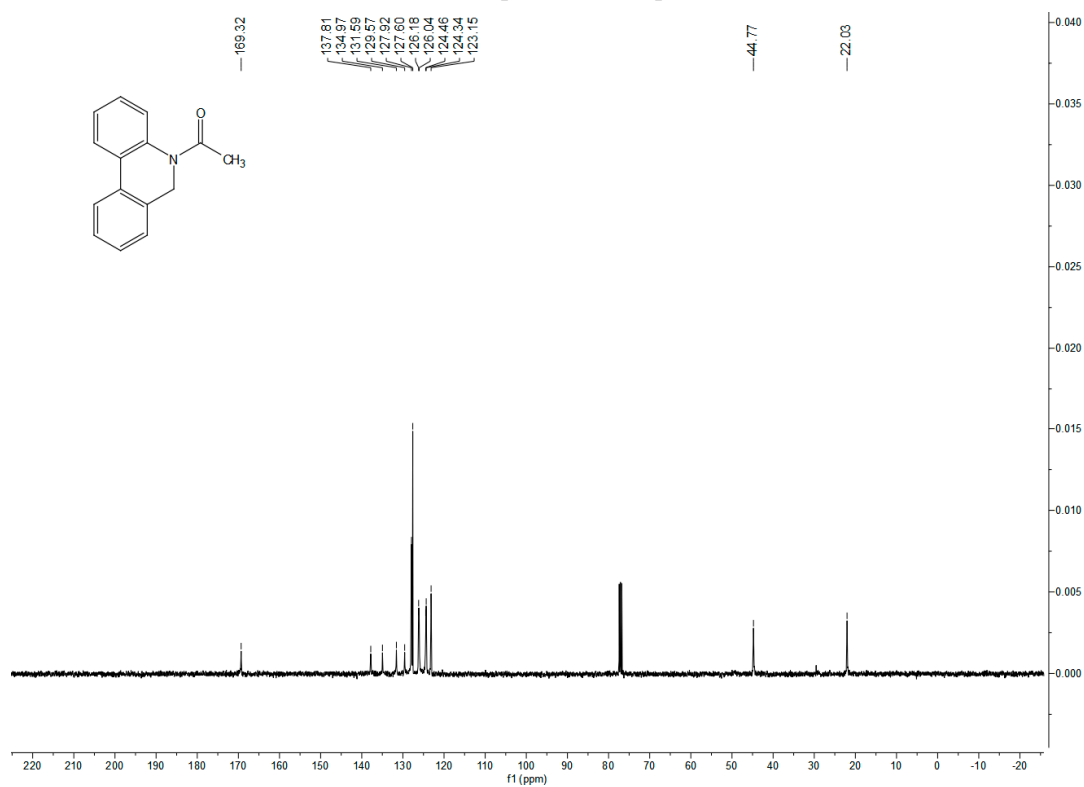



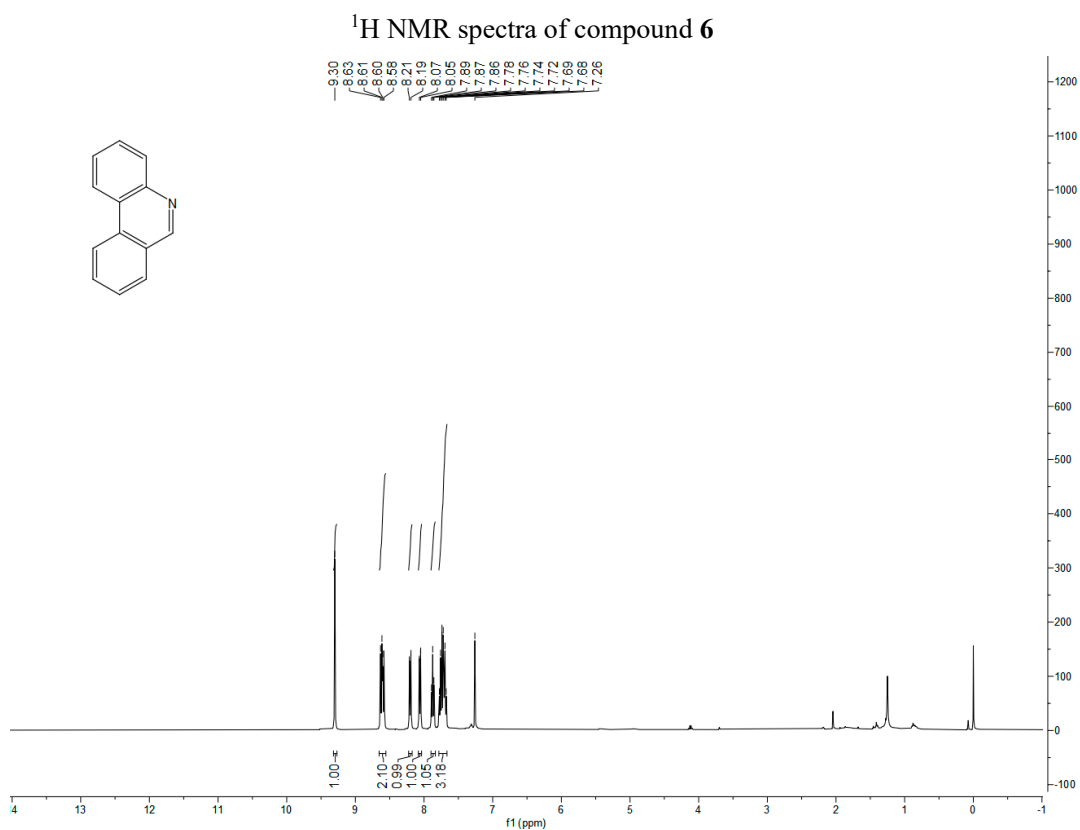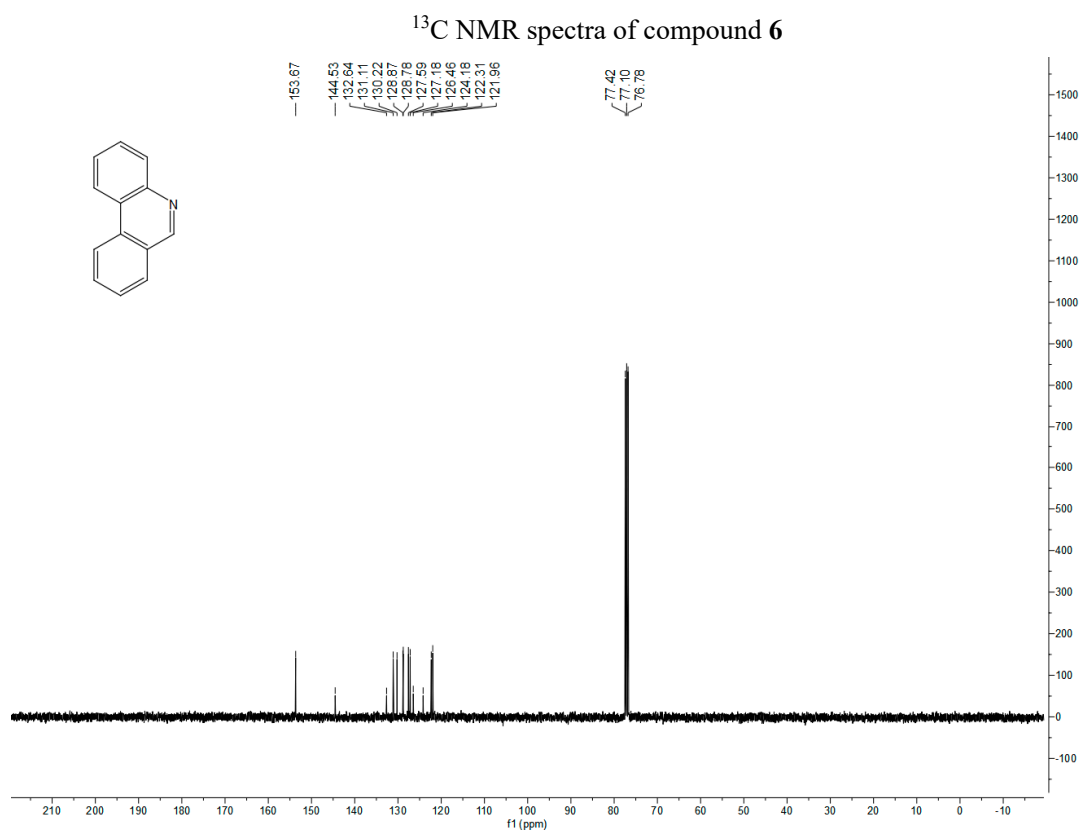

<sup>1</sup>H NMR spectra of compound 7

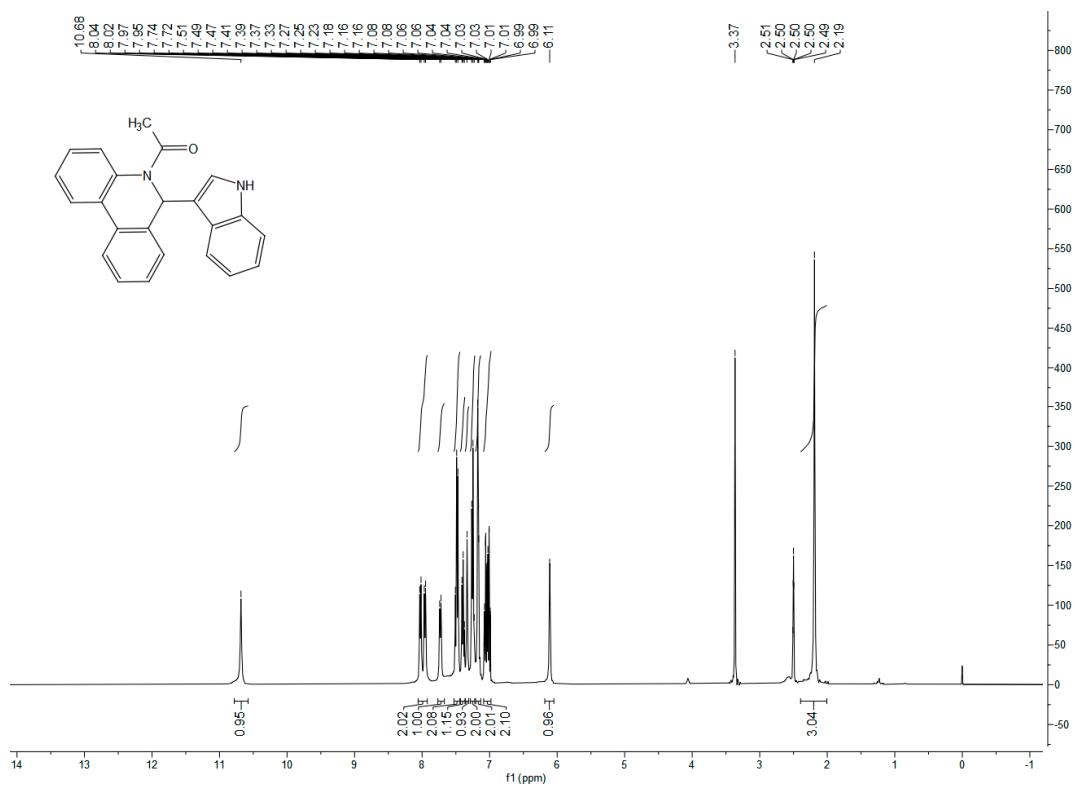

<sup>13</sup>C NMR spectra of compound 7

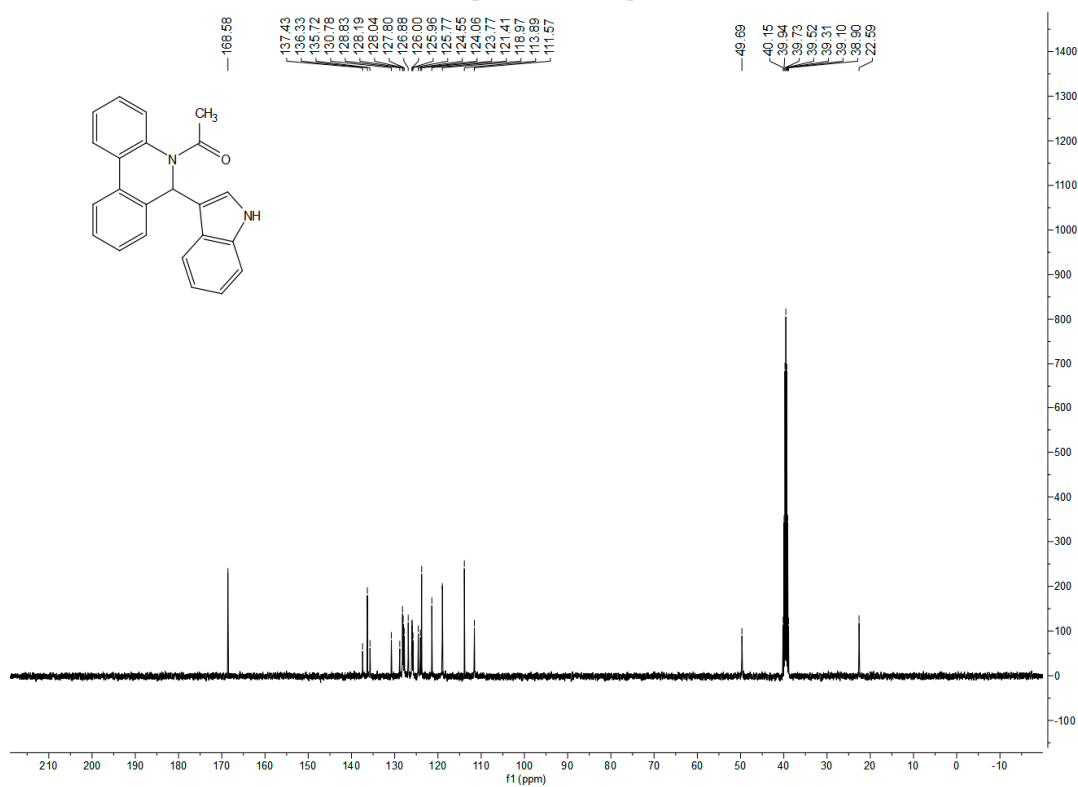

7. X-ray Crystal Structure of Compounds **2a** (CCDC: 1985688)

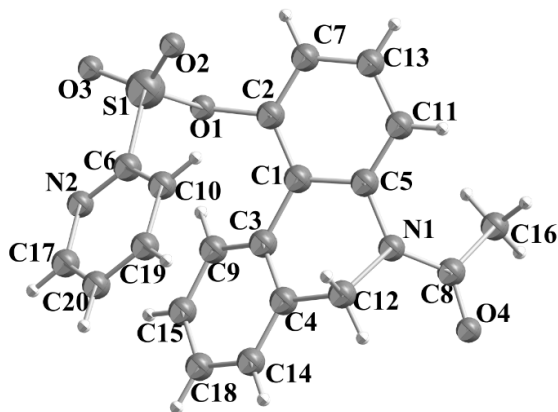

**Figure S2. Crystallographic structure data parameters of 2a**

|                                 |                                                                                                                       |
|---------------------------------|-----------------------------------------------------------------------------------------------------------------------|
| Identification code             | <b>2a</b>                                                                                                             |
| Empirical formula               | C <sub>20</sub> H <sub>16</sub> N <sub>2</sub> O <sub>4</sub> S                                                       |
| Formula weight                  | 380.41                                                                                                                |
| Temperature                     | 296.15 K                                                                                                              |
| Wavelength                      | 0.71073 Å                                                                                                             |
| Crystal system, space group     | Monoclinic, P 1 2 <sub>1</sub> /c 1                                                                                   |
| Unit cell dimensions            | a = 7.5334(15) Å    alpha = 90 deg.<br>b = 20.396(4) Å    beta = 105.500(4) deg<br>c = 12.054(2) Å    gamma = 90 deg. |
| Volume                          | 1784.8(6) Å <sup>3</sup>                                                                                              |
| Z, Calculated density           | 4, 1.416 Mg/m <sup>3</sup>                                                                                            |
| Absorption coefficient          | 0.211 mm <sup>-1</sup>                                                                                                |
| F(000)                          | 792                                                                                                                   |
| Crystal size                    | 0.52 x 0.43 x 0.40 mm                                                                                                 |
| Theta range for data collection | 1.997 to 25.497 deg.                                                                                                  |
| Limiting indices                | -9 ≤ h ≤ 8, -22 ≤ k ≤ 24, -11 ≤ l ≤ 14                                                                                |
| Reflections collected / unique  | 9383 / 3308 [R(int) = 0.1193]                                                                                         |
| Completeness to theta = 25.242  | 99.7 %                                                                                                                |
| Absorption correction           | None                                                                                                                  |
| Refinement method               | Full-matrix least-squares on F <sup>2</sup>                                                                           |

|                                      |                                       |
|--------------------------------------|---------------------------------------|
| Data / restraints / parameters       | 3308 / 0 / 245                        |
| Goodness-of-fit on $F^2$             | 0.918                                 |
| Final R indices [ $I > 2\sigma(I)$ ] | $R_1 = 0.0558$ , $wR_2 = 0.1340$      |
| R indices (all data)                 | $R_1 = 0.0915$ , $wR_2 = 0.1526$      |
| Largest diff. peak and hole          | 0.789 and -0.372 e. $\text{\AA}^{-3}$ |
